# Supplementary material for: Nanobodies combined with DNA-PAINT super-resolution reveal a staggered titin nanoarchitecture in flight muscles
Source: eLife journal article supplement (doi:10.7554/elife.79344), 2022-12-13
Supplement: supp [file elife-79344-supp-v1.zip]

Archive with 9 entries (9 files):
- elife_poa_e79344_Figure_1_figure_supplement_1.pdf
- elife_poa_e79344_Figure_3_figure_supplement_1.pdf
- elife_poa_e79344_Figure_3_figure_supplement_2.pdf
- elife_poa_e79344_Figure_5_figure_supplement_1.pdf
- elife_poa_e79344_Figure_6_figure_supplement_1.pdf
- elife_poa_e79344_Figure_3_source_data_1.xlsx
- elife_poa_e79344_Figure_4_source_data_1.xlsx
- elife_poa_e79344_Figure_5_source_data_1.xlsx
- elife_poa_e79344_Figure_6_source_data_1.xlsx
