# Supplementary material for: Nanobodies combined with DNA-PAINT super-resolution reveal a staggered titin nanoarchitecture in flight muscles
Source: eLife journal article supplement (doi:10.7554/elife.79344), 2022-12-13
Supplement: supp [file elife-79344-supp-v1.zip]

A

Sample preparation

- 1. Thorax isolation by cutting head, wings and abdomen
- 2. Thorax fixation
- 3. Hemi-thorax isolation by cutting with microtome knife
- 4. Staining with nanobodies
- 5. Mounting on sample chamber

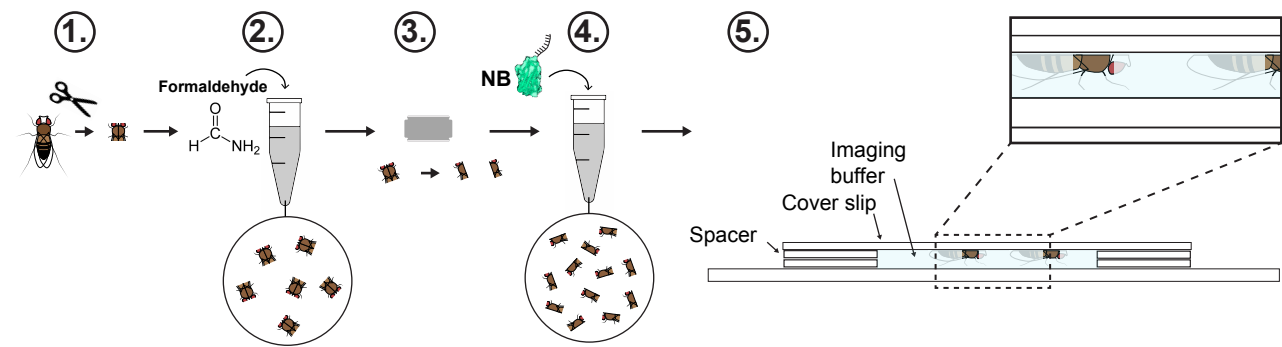

B

Super-resolution microscopy imaging & post processing

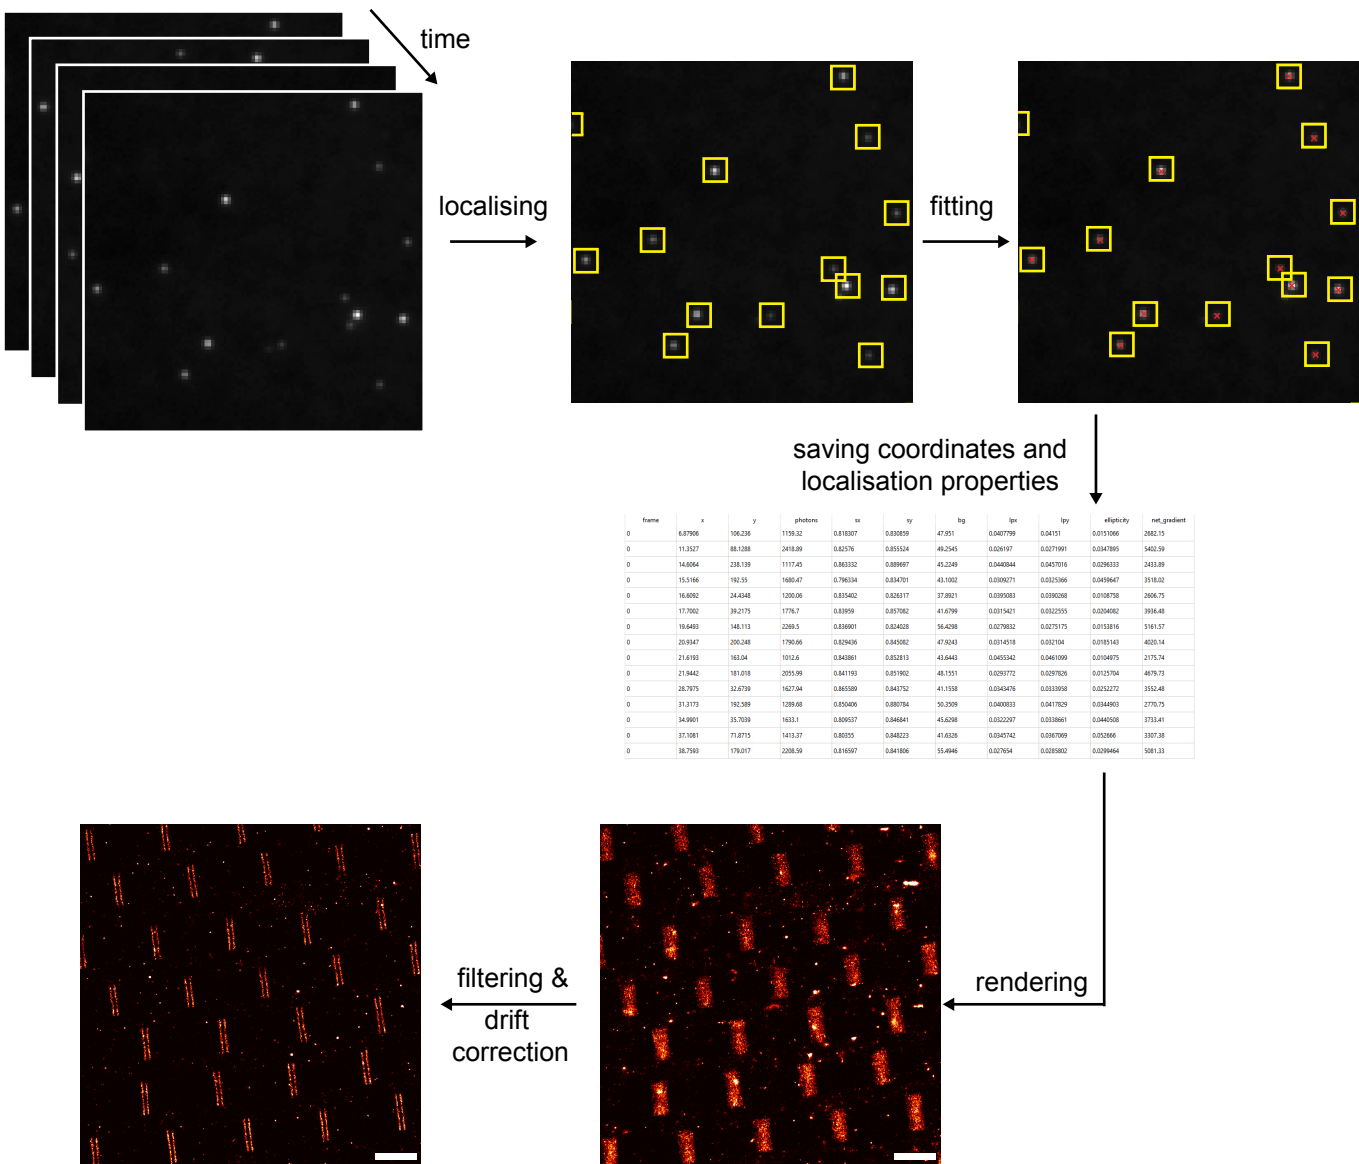

Figure 3 - figure supplement 1
