# Supplementary material for: Nanobodies combined with DNA-PAINT super-resolution reveal a staggered titin nanoarchitecture in flight muscles
Source: eLife journal article supplement (doi:10.7554/elife.79344), 2022-12-13
Supplement: supp [file elife-79344-supp-v1.zip › elife_poa_e79344_Figure_1_figure_supplement_1.pdf]

## A Sallimus genome locus and flight muscle protein isoform

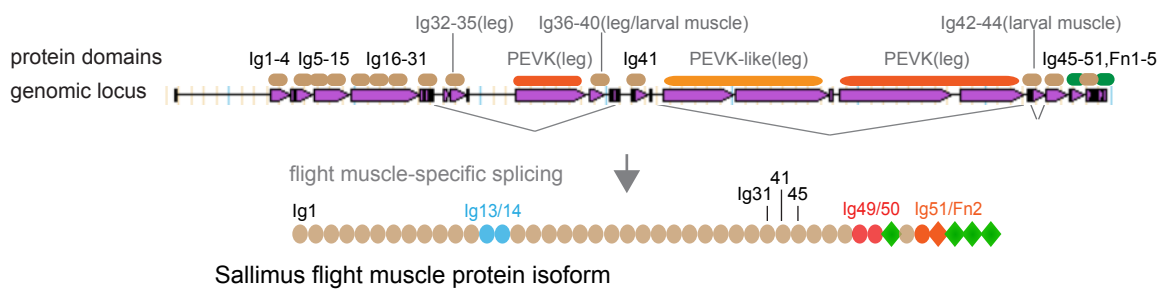

## B Projectin genome locus and flight muscle protein isoform

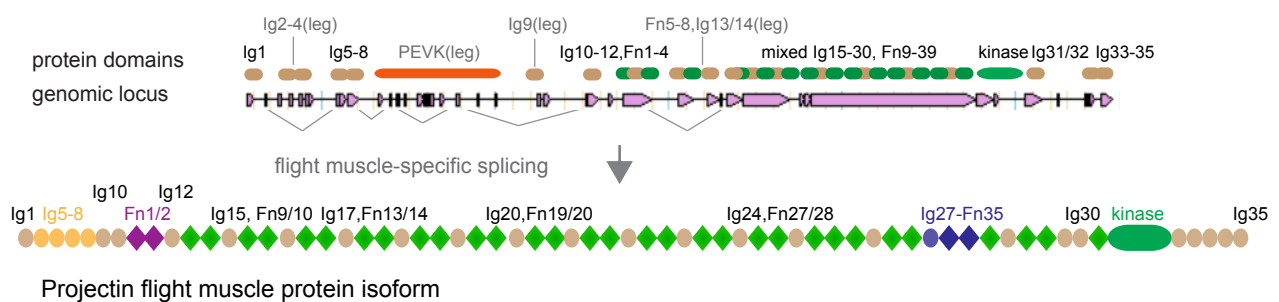

Figure 1 - figure supplement 1
