# Supplementary material for: Nanobodies combined with DNA-PAINT super-resolution reveal a staggered titin nanoarchitecture in flight muscles
Source: eLife journal article supplement (doi:10.7554/elife.79344), 2022-12-13
Supplement: supp [file elife-79344-supp-v1.zip › elife_poa_e79344_Figure_3_source_data_1.xlsx]

## Sheet: Fig_3
sample 7			band_distance
FOV 1			236.25767803634983
nanobody Nano 29			222.78740584874103
			220.97081477740002
			257.6232157381037
			222.6945525395832
			216.09539984913087
			218.196106088655
			231.7132165599884
			227.4893749546487
			227.5075924783613
			228.85542435019943
			236.3989802349343
			221.6572978123554
			225.90368200865157
			220.04012065527263
			240.8196521189535
			234.53013975132416
			227.41332343108863
			229.32517597912124
			253.57800450144737
			218.5306186745008
			225.79763928955558
			235.7212309219276
			222.17694155596212
			229.8551892916507
			232.0938513942312
			215.68070055142186
			212.7518195905504
			226.69350444729787
			224.07129132261448
			223.55178019476799
			217.011910954646
			217.86269197400017
			227.22433347092502
			238.94151475326882
			216.55451654641013
			239.4729021184085
			227.24651818790002
			223.19137566701042
			232.3339249103444
			220.525364445688
			211.820996571058
			222.7204670159847
			232.09943658757481
			222.20228509271183
			218.29451495093338
			220.68190215810432
			204.84218993453862
			228.00421594776833
			207.1537195792532
			230.9102928240641
			208.7866238512904
			225.24909350935872
			211.60197853931263
			220.73091136482788
			220.2386877127989
			214.92128309602487
			220.8941246487251
			226.2868143895577
			232.9031263108561
			231.8670439145706
			221.2486994233916
			224.3210971974108
			223.14408388054028
			232.87235271560348
			234.5655614772528
			233.93047003861312
			209.1752507014101
			232.4667306337133
			231.51793782527562
			211.04494738498488
			211.83241772791973
			218.4245610989754
			228.48156340010604
			225.9176585261315
			222.54598992058246
			222.5619019029446
			216.2776321832053
			224.5697686143706
			223.12338725214985
			214.15480683594063
			226.8165782396219
			216.71538177982958
			225.57172336906262
			238.3276740543937
			218.3551533424909
			221.70150183718727
			229.46011067048119
			218.29023752761657
			231.6554860760686
			232.3454381263696
			224.348783222689
			224.2726344047031
			229.26490446537812
			208.23669674543999
			227.99068777568425
			213.14918024724307
			210.10771081824143
			214.01268684908985
			214.4251250994176
			215.86296494641832
			219.02026836141945
			230.19034896559617
			216.28287114116856
			223.8994768120148
			212.8377334552147
			212.66877172238307
			208.80079970473045
			210.439251894295
			211.258461165362
			219.46574038243256
			205.5490907473328
			215.3275589205097
			219.50027161818127
			213.52501807821625
			206.48091408358937
			206.38407441378087
			210.7538514780549
			215.67309074248212
			224.881558619148
			220.77729632541957
			218.41478149510704
			220.01735887528545
			228.4722318770797
			217.75322303825104
			205.13299006769557
			222.67278115316208
			217.4898046571231
			221.48484048509124
			224.2612449430761
			222.48437273430085
			214.93789166387901
			203.83833723331009
			223.14986610469163
			224.07490981858103
			222.01820290271598
			212.97170320598184
			228.46029817756573
			222.59717757087685
			226.04664181279247
			228.30047822447509
			222.23392992137008
			220.48429175547653
			223.52594914547436
			220.5225295160584
			214.61749184673081
			209.94913518526843
			220.25183027433744
			216.59026301055974
			223.515882489775
			223.75160398338159
			219.98296701565394
			218.8779859012928
			221.50742776723462
			218.4399677771211
			224.98867185385086
			220.51066724182306
			226.13973358357015
			222.69152549753102
			213.362773388692
			227.18328906627733
			214.76206021891244
			218.59717749902646
			217.53879558223758
			221.11670034844195
			211.7925011253584
			211.75507912985242
			216.5291283975418
			220.1650372284314
			207.84221233639187
			216.32104119068921
			214.05843188308208
			220.58749121436162
			223.3881352386419
			212.48645412064602
			204.89145674637143
			233.9271543946485
			219.1482365529297
			216.2361355183017
			213.3573701422337
			214.37086314644299
			222.37946133314185
			216.14330032564223
			215.16080081959475
			218.18984519466167
			218.04853916361594
			210.03478495477168
			204.32095873346069
			219.85802780625176
			207.61100672532365
			225.8023972585045
			215.9255012775341
			231.24795090936658
			208.37758871791402
			219.5219065342649
			211.79485400831825
			217.4586130781303
			226.956047362546
			206.8611030545153
			220.44034895072602
			218.50003335524207
			235.41973604948532
			232.50026482018433
			229.7365214911628
			221.6100393637646
			219.88562494289397
			212.05655502601925
			212.6661266052018
			211.49565479620412
			210.24913816529812
			232.69195478476175
			204.99635117755557
			198.67192376455952
			205.84283334382042
			204.86834265959538
			228.53437165428392
			221.23854163521102
			215.11541299826263
			216.821560163398
			204.95234422651606
			222.95534400779331
