# Supplementary material for: Nanobodies combined with DNA-PAINT super-resolution reveal a staggered titin nanoarchitecture in flight muscles
Source: eLife journal article supplement (doi:10.7554/elife.79344), 2022-12-13
Supplement: supp [file elife-79344-supp-v1.zip › elife_poa_e79344_Figure_4_source_data_1.xlsx]

## Sheet: Fig_4
sample	year	FOV	nanobody_inner	nanobody_outer		fly_sample	fly_number	selection	zdisk	nanobody	band_distance		Imaging conditions:
5	2019	FOV1	Nano2	Nano35		5	1	1	3	Nano 2	123.725405673219		Sample	Nb inner	Nb outer	Power	Imager	Exposure	# Frames	Dye
4	2019	FOV2	Nano2	Nano33		5	1	1	4	Nano 2	115.50659049305452		1	Nano2	Nano28	58 mW	P3 2 nM	100 ms	15000	Cy3B
17	2019	FOV2	Nano39	Nano35		5	1	1	5	Nano 2	108.5865387144574		4	Nano2	Nano33	58 mW	P3 2 nM	100 ms	15000	Cy3B
9	2019	FOV2	Nano29	Nano33		5	1	1	6	Nano 2	110.05885802343272		5	Nano2	Nano35	58 mW	P3 2 nM	100 ms	15000	Cy3B
11	2019	FOV2	Nano29	Nano37		5	1	1	7	Nano 2	126.68553142508812		7	Nano2	Nano39	58 mW	P3 2 nM	100 ms	15000	Cy3B
13	2019	FOV1	Nano30	Nano33		5	1	1	8	Nano 2	120.37970555534031		9	Nano29	Nano33	58 mW	P3 2 nM	100 ms	15000	Cy3B
15	2019	FOV1	Nano30	Nano37		5	1	2	1	Nano 2	113.83693402202309		11	Nano29	Nano37	58 mW	P3 2 nM	100 ms	15000	Cy3B
						5	1	2	2	Nano 2	100.56664412835943		13	Nano30	Nano33	58 mW	P3 2 nM	100 ms	15000	Cy3B
						5	1	2	3	Nano 2	134.57002687939578		15	Nano30	Nano37	58 mW	P3 2 nM	100 ms	15000	Cy3B
						5	1	2	4	Nano 2	123.81416626925684		17	Nano39	Nano35	58 mW	P3 2 nM	100 ms	15000	Cy3B
						5	1	3	4	Nano 2	91.62543528693121
						5	1	3	5	Nano 2	107.30413977848869
						5	1	4	1	Nano 2	91.47449355255121
						5	1	4	2	Nano 2	121.30616165713914
						5	1	4	3	Nano 2	121.61262947162008
						5	1	4	4	Nano 2	129.14581973826586
						5	1	5	1	Nano 2	110.65177820858048
						5	1	5	2	Nano 2	129.94505641942638
						5	1	5	3	Nano 2	122.17067441643186
						5	1	5	4	Nano 2	118.4841738131624
						5	1	7	8	Nano 2	124.58512271145622
						5	1	7	9	Nano 2	111.76600655869294
						5	1	10	1	Nano 2	112.73013342549307
						5	1	10	2	Nano 2	105.83921619238843
						5	1	10	3	Nano 2	122.92299717505271
						5	1	10	4	Nano 2	116.1602561720278
						5	1	10	5	Nano 2	110.28487866483287
						5	1	10	6	Nano 2	102.40019954900588
						5	1	10	7	Nano 2	123.14889935993135
						5	1	10	8	Nano 2	107.50990741341894
						5	1	10	9	Nano 2	120.699324740456
						5	1	10	10	Nano 2	117.85672697798019
						5	1	10	11	Nano 2	137.31140850716145
						5	1	10	12	Nano 2	123.23128731507325
						5	1	10	13	Nano 2	131.28759021190945
						5	1	10	14	Nano 2	91.71198159323522
						5	1	10	15	Nano 2	118.00330978182842
						5	1	10	16	Nano 2	113.10796095777279
						5	1	10	17	Nano 2	114.37239008501592
						5	1	11	2	Nano 2	107.95698763139809
						5	1	11	3	Nano 2	124.59483758155883
						5	1	11	4	Nano 2	112.65317217558632
						5	1	11	5	Nano 2	121.00224375684704
						5	1	11	6	Nano 2	119.70323243924723
						5	1	11	7	Nano 2	106.65925354965168
						5	1	13	1	Nano 2	117.81980340568695
						5	1	13	2	Nano 2	123.56337730316484
						5	1	13	3	Nano 2	120.59496370133472
						5	1	13	4	Nano 2	107.3970627475738
						5	1	13	5	Nano 2	134.2906954660127
						5	1	13	6	Nano 2	122.83194102286328
						5	1	13	7	Nano 2	123.460739141033
						5	1	13	8	Nano 2	104.18476473780287
						5	1	13	9	Nano 2	108.2942385362992
						5	1	13	10	Nano 2	134.51940483616966
						5	1	13	11	Nano 2	134.61547829208598
						5	1	16	11	Nano 2	113.3969691952842
						5	1	16	12	Nano 2	123.35101719550948
						5	1	16	13	Nano 2	116.57979827979773
						5	1	1	3	Nano 35	732.2403633882489
						5	1	1	4	Nano 35	749.4305091965448
						5	1	1	5	Nano 35	695.1617782272807
						5	1	1	6	Nano 35	726.6842410687027
						5	1	1	7	Nano 35	772.5365092890936
						5	1	1	8	Nano 35	756.1633458915308
						5	1	2	1	Nano 35	756.0639044948176
						5	1	2	2	Nano 35	743.7892314145394
						5	1	2	3	Nano 35	739.1047175257986
						5	1	2	4	Nano 35	738.3342268672176
						5	1	3	4	Nano 35	720.974472830332
						5	1	3	5	Nano 35	701.5980213149103
						5	1	4	1	Nano 35	719.3941406366887
						5	1	4	2	Nano 35	731.4160339581102
						5	1	4	3	Nano 35	736.236873919401
						5	1	4	4	Nano 35	724.4465603284152
						5	1	5	1	Nano 35	811.6743416315227
						5	1	5	2	Nano 35	741.7836847432575
						5	1	5	3	Nano 35	730.4725312018447
						5	1	5	4	Nano 35	789.2437543526354
						5	1	7	8	Nano 35	774.9809480818213
						5	1	7	9	Nano 35	723.1959844956546
						5	1	10	1	Nano 35	693.1781155532549
						5	1	10	2	Nano 35	762.3831050641272
						5	1	10	3	Nano 35	754.512188944011
						5	1	10	4	Nano 35	739.3214930160549
						5	1	10	5	Nano 35	708.160390079348
						5	1	10	6	Nano 35	737.0245656072908
						5	1	10	7	Nano 35	739.9224728278481
						5	1	10	8	Nano 35	658.06943519448
						5	1	10	9	Nano 35	754.9341291459042
						5	1	10	10	Nano 35	772.3686890241548
						5	1	10	11	Nano 35	759.0449898731339
						5	1	10	12	Nano 35	732.4088116370883
						5	1	10	13	Nano 35	784.6830322893242
						5	1	10	14	Nano 35	760.0052509724417
						5	1	10	15	Nano 35	748.7739650295622
						5	1	10	16	Nano 35	721.4492869891161
						5	1	10	17	Nano 35	751.5071711426941
						5	1	11	2	Nano 35	734.1893010477731
						5	1	11	3	Nano 35	729.3517158980045
						5	1	11	4	Nano 35	770.9254169317854
						5	1	11	5	Nano 35	759.1612000804291
						5	1	11	6	Nano 35	669.5873607764909
						5	1	11	7	Nano 35	723.1380905323967
						5	1	13	1	Nano 35	782.4150199454491
						5	1	13	2	Nano 35	755.3497336316592
						5	1	13	3	Nano 35	720.6841038496509
						5	1	13	4	Nano 35	709.1793380425959
						5	1	13	5	Nano 35	772.3584130000926
						5	1	13	6	Nano 35	769.6803151920682
						5	1	13	7	Nano 35	698.5498252351215
						5	1	13	8	Nano 35	717.5751700118577
						5	1	13	9	Nano 35	745.1614256709728
						5	1	13	10	Nano 35	758.0826610048233
						5	1	13	11	Nano 35	738.562815659094
						5	1	16	11	Nano 35	692.8536605324757
						5	1	16	12	Nano 35	742.8357962320946
						5	1	16	13	Nano 35	781.3424017483916
						4	2	1	1	Nano 2	95.75817364450104
						4	2	1	2	Nano 2	106.70405658647377
						4	2	1	3	Nano 2	108.74544192511681
						4	2	2	1	Nano 2	84.53312729008618
						4	2	2	2	Nano 2	70.6545237042478
						4	2	2	3	Nano 2	86.61549010866892
						4	2	2	4	Nano 2	73.3877290909517
						4	2	2	5	Nano 2	87.15503651572973
						4	2	2	6	Nano 2	66.56488510117356
						4	2	3	1	Nano 2	100.23664499633776
						4	2	3	2	Nano 2	105.1564361051301
						4	2	4	3	Nano 2	93.66801021041063
						4	2	4	4	Nano 2	96.20666862275922
						4	2	4	5	Nano 2	82.34310809770038
						4	2	6	1	Nano 2	86.77773481119829
						4	2	6	2	Nano 2	100.6576060213756
						4	2	6	3	Nano 2	96.65383334409569
						4	2	6	4	Nano 2	107.00408911680952
						4	2	7	5	Nano 2	104.62149331947019
						4	2	7	6	Nano 2	111.88795503622116
						4	2	8	1	Nano 2	98.9934351188036
						4	2	8	2	Nano 2	96.40414897055435
						4	2	8	3	Nano 2	102.576733777355
						4	2	8	4	Nano 2	93.36500063525236
						4	2	9	1	Nano 2	89.98466042812582
						4	2	9	2	Nano 2	106.64923121824197
						4	2	9	3	Nano 2	94.2901899379271
						4	2	9	4	Nano 2	101.83432982308727
						4	2	12	3	Nano 2	103.6805853117866
						4	2	12	4	Nano 2	112.57776403709015
						4	2	12	5	Nano 2	111.38510990861565
						4	2	13	5	Nano 2	107.03696470413576
						4	2	13	6	Nano 2	108.69190113718588
						4	2	13	7	Nano 2	95.54333073634352
						4	2	1	1	Nano 33	886.2266853278398
						4	2	1	2	Nano 33	867.6841172737696
						4	2	1	3	Nano 33	870.2611622918324
						4	2	2	1	Nano 33	691.2005476068238
						4	2	2	2	Nano 33	712.928398570954
						4	2	2	3	Nano 33	698.0342837076123
						4	2	2	4	Nano 33	720.6971992950769
						4	2	2	5	Nano 33	748.6522233502161
						4	2	2	6	Nano 33	736.3121927600656
						4	2	3	1	Nano 33	744.9793020221257
						4	2	3	2	Nano 33	746.6947209797281
						4	2	4	3	Nano 33	720.1488807756211
						4	2	4	4	Nano 33	735.0168105874866
						4	2	4	5	Nano 33	734.4459721771217
						4	2	6	1	Nano 33	745.3703141143664
						4	2	6	2	Nano 33	774.6815954750352
						4	2	6	3	Nano 33	770.4116424577372
						4	2	6	4	Nano 33	824.8778113121944
						4	2	7	5	Nano 33	778.6606299950541
						4	2	7	6	Nano 33	805.0240538082833
						4	2	8	1	Nano 33	742.7405803669913
						4	2	8	2	Nano 33	758.3019745319383
						4	2	8	3	Nano 33	762.3326798380722
						4	2	8	4	Nano 33	767.6366117633452
						4	2	9	1	Nano 33	689.3297816081201
						4	2	9	2	Nano 33	689.6199813311532
						4	2	9	3	Nano 33	683.0371874881332
						4	2	9	4	Nano 33	700.4412380152811
						4	2	12	3	Nano 33	748.1404194587642
						4	2	12	4	Nano 33	746.5285279790802
						4	2	12	5	Nano 33	776.7657728025205
						4	2	13	5	Nano 33	705.7696466968573
						4	2	13	6	Nano 33	676.8806468225688
						4	2	13	7	Nano 33	689.6394022487633
						17	2	1	3	Nano 39	189.6449623347617
						17	2	1	4	Nano 39	193.05433690262038
						17	2	1	5	Nano 39	195.516245551419
						17	2	1	6	Nano 39	186.16476211005417
						17	2	1	7	Nano 39	194.1798475805496
						17	2	1	8	Nano 39	186.5554980285416
						17	2	2	4	Nano 39	194.932950467546
						17	2	2	5	Nano 39	191.79385281667086
						17	2	2	6	Nano 39	190.8810827176029
						17	2	2	7	Nano 39	188.80257500989416
						17	2	2	8	Nano 39	184.93000502651054
						17	2	2	9	Nano 39	193.21642871646785
						17	2	3	2	Nano 39	186.6738048989098
						17	2	3	3	Nano 39	191.34631639216633
						17	2	3	4	Nano 39	202.12529903708912
						17	2	4	5	Nano 39	185.9932881566985
						17	2	4	6	Nano 39	190.2119281268301
						17	2	4	7	Nano 39	184.80980111187733
						17	2	6	6	Nano 39	200.39732209561157
						17	2	6	7	Nano 39	198.26854811880023
						17	2	6	8	Nano 39	189.6316761560948
						17	2	6	9	Nano 39	190.3528479590065
						17	2	7	1	Nano 39	195.8403354129028
						17	2	7	2	Nano 39	182.95713446057812
						17	2	8	1	Nano 39	188.85260428479546
						17	2	8	2	Nano 39	192.2915694672552
						17	2	8	3	Nano 39	194.96565419402012
						17	2	8	4	Nano 39	193.72476292430576
						17	2	8	5	Nano 39	197.97699034585904
						17	2	8	6	Nano 39	185.39319621323762
						17	2	9	1	Nano 39	191.47741081257828
						17	2	9	2	Nano 39	194.69519390855447
						17	2	9	3	Nano 39	198.21068964968774
						17	2	9	4	Nano 39	184.8227950387705
						17	2	9	5	Nano 39	203.16871291304835
						17	2	10	2	Nano 39	202.9374176215257
						17	2	10	3	Nano 39	196.89443947127742
						17	2	11	3	Nano 39	198.5403910772817
						17	2	11	4	Nano 39	194.89806575599533
						17	2	12	3	Nano 39	199.5431885615237
						17	2	12	4	Nano 39	200.74814807146197
						17	2	12	5	Nano 39	199.59807134615852
						17	2	12	6	Nano 39	193.29235107038784
						17	2	12	7	Nano 39	192.3600488744594
						17	2	13	2	Nano 39	194.11165206613984
						17	2	13	3	Nano 39	187.1755028234597
						17	2	13	4	Nano 39	188.79333408676118
						17	2	13	5	Nano 39	189.69284027901128
						17	2	13	6	Nano 39	194.7770876320723
						17	2	14	3	Nano 39	199.64462981612115
						17	2	14	4	Nano 39	210.87656786753982
						17	2	14	5	Nano 39	190.17374326705811
						17	2	14	6	Nano 39	190.34648219550576
						17	2	15	5	Nano 39	197.13528659110446
						17	2	15	6	Nano 39	191.98471345878403
						17	2	16	1	Nano 39	197.16525462424514
						17	2	16	2	Nano 39	195.920503523846
						17	2	17	1	Nano 39	248.36349785646138
						17	2	17	2	Nano 39	197.4922169607793
						17	2	17	3	Nano 39	198.431275593163
						17	2	17	4	Nano 39	202.62016236213032
						17	2	17	5	Nano 39	198.39555708547195
						17	2	17	6	Nano 39	200.1292370034869
						17	2	1	3	Nano 35	691.1629760832678
						17	2	1	4	Nano 35	689.7323236236473
						17	2	1	5	Nano 35	694.3131438066486
						17	2	1	6	Nano 35	691.7398229515317
						17	2	1	7	Nano 35	703.5820888361209
						17	2	1	8	Nano 35	649.2298195571874
						17	2	2	4	Nano 35	669.7426356952309
						17	2	2	5	Nano 35	692.156851803213
						17	2	2	6	Nano 35	676.7717890340276
						17	2	2	7	Nano 35	692.2411958201843
						17	2	2	8	Nano 35	682.2775785632751
						17	2	2	9	Nano 35	723.2625349534383
						17	2	3	2	Nano 35	683.1037287592793
						17	2	3	3	Nano 35	662.075586190565
						17	2	3	4	Nano 35	697.4221477225498
						17	2	4	5	Nano 35	702.9531020133136
						17	2	4	6	Nano 35	697.7710308366667
						17	2	4	7	Nano 35	688.1623644716014
						17	2	6	6	Nano 35	680.270170027932
						17	2	6	7	Nano 35	706.6176997781306
						17	2	6	8	Nano 35	683.2527038975559
						17	2	6	9	Nano 35	684.5902085638767
						17	2	7	1	Nano 35	697.2775915713693
						17	2	7	2	Nano 35	685.693915125277
						17	2	8	1	Nano 35	712.5573152895422
						17	2	8	2	Nano 35	679.0951806502673
						17	2	8	3	Nano 35	690.1635884465808
						17	2	8	4	Nano 35	684.6885189638351
						17	2	8	5	Nano 35	699.3953876231649
						17	2	8	6	Nano 35	683.4624547718681
						17	2	9	1	Nano 35	679.4154171868133
						17	2	9	2	Nano 35	690.0352833525093
						17	2	9	3	Nano 35	691.1878826938955
						17	2	9	4	Nano 35	674.9984254107824
						17	2	9	5	Nano 35	698.0220082023759
						17	2	10	2	Nano 35	685.675698508225
						17	2	10	3	Nano 35	687.4907575756591
						17	2	11	3	Nano 35	706.6849381384133
						17	2	11	4	Nano 35	659.8727814248575
						17	2	12	3	Nano 35	684.9109163871326
						17	2	12	4	Nano 35	710.8488162090973
						17	2	12	5	Nano 35	678.6146728795107
						17	2	12	6	Nano 35	685.5341695381255
						17	2	12	7	Nano 35	705.8106375634128
						17	2	13	2	Nano 35	679.3697330532099
						17	2	13	3	Nano 35	661.0284516901874
						17	2	13	4	Nano 35	691.518279101633
						17	2	13	5	Nano 35	699.2259809748215
						17	2	13	6	Nano 35	683.7404756724101
						17	2	14	3	Nano 35	692.4475361023634
						17	2	14	4	Nano 35	692.8237100042888
						17	2	14	5	Nano 35	687.6998939344259
						17	2	14	6	Nano 35	684.3912410014951
						17	2	15	5	Nano 35	705.4015465283683
						17	2	15	6	Nano 35	684.0535200425759
						17	2	16	1	Nano 35	695.4531617156122
						17	2	16	2	Nano 35	710.4392914261282
						17	2	17	1	Nano 35	757.7214148029428
						17	2	17	2	Nano 35	697.7077589773818
						17	2	17	3	Nano 35	714.9097469839189
						17	2	17	4	Nano 35	715.2898586900545
						17	2	17	5	Nano 35	653.8792557364496
						17	2	17	6	Nano 35	726.7145956209172
						9	2	1	1	Nano 29	169.58748787626914
						9	2	1	2	Nano 29	173.96892023863137
						9	2	3	2	Nano 29	168.423686066532
						9	2	3	3	Nano 29	168.92589790712904
						9	2	3	4	Nano 29	164.27614381761998
						9	2	4	1	Nano 29	166.44751197603074
						9	2	4	2	Nano 29	157.22189655348532
						9	2	5	3	Nano 29	168.62162587414733
						9	2	5	4	Nano 29	161.01204155836314
						9	2	5	5	Nano 29	154.36647976117925
						9	2	5	6	Nano 29	158.21885271503018
						9	2	8	9	Nano 29	152.15408167293648
						9	2	8	10	Nano 29	159.04938299008418
						9	2	9	1	Nano 29	176.18184220233863
						9	2	9	2	Nano 29	166.85763619798712
						9	2	9	3	Nano 29	159.63113327225585
						9	2	11	1	Nano 29	162.39777215949889
						9	2	11	2	Nano 29	168.29045233011342
						9	2	11	3	Nano 29	158.36235136701592
						9	2	12	1	Nano 29	167.49665706058545
						9	2	12	2	Nano 29	162.0446936573157
						9	2	12	3	Nano 29	176.00519400144333
						9	2	12	4	Nano 29	168.87816472207373
						9	2	12	5	Nano 29	160.45464280224266
						9	2	13	2	Nano 29	172.41303887871155
						9	2	13	3	Nano 29	183.3369373290281
						9	2	13	4	Nano 29	173.92320791981163
						9	2	14	1	Nano 29	184.58883831909145
						9	2	14	2	Nano 29	175.85900403130012
						9	2	14	3	Nano 29	195.16098693532498
						9	2	17	1	Nano 29	212.90093266156185
						9	2	17	2	Nano 29	201.3693648236653
						9	2	18	1	Nano 29	181.40244210912442
						9	2	18	2	Nano 29	221.49134535658527
						9	2	18	3	Nano 29	234.00064375125282
						9	2	1	1	Nano 33	684.2928837338659
						9	2	1	2	Nano 33	700.2700273309608
						9	2	3	2	Nano 33	686.6610605254576
						9	2	3	3	Nano 33	693.7437839212552
						9	2	3	4	Nano 33	674.6946239226703
						9	2	4	1	Nano 33	689.8370634522705
						9	2	4	2	Nano 33	661.1456459182149
						9	2	5	3	Nano 33	687.711608010555
						9	2	5	4	Nano 33	665.5018323856212
						9	2	5	5	Nano 33	657.8333747233846
						9	2	5	6	Nano 33	669.3965881267206
						9	2	8	9	Nano 33	639.5537232044461
						9	2	8	10	Nano 33	660.1616886680482
						9	2	9	1	Nano 33	664.8876134496666
						9	2	9	2	Nano 33	669.4618835801551
						9	2	9	3	Nano 33	686.7215847930247
						9	2	11	1	Nano 33	676.2771582507453
						9	2	11	2	Nano 33	641.3633617475706
						9	2	11	3	Nano 33	658.5905938536614
						9	2	12	1	Nano 33	678.5753823287406
						9	2	12	2	Nano 33	678.4523571020234
						9	2	12	3	Nano 33	677.5405939579766
						9	2	12	4	Nano 33	664.993350755921
						9	2	12	5	Nano 33	654.1140442553022
						9	2	13	2	Nano 33	693.674635780208
						9	2	13	3	Nano 33	715.5514028927147
						9	2	13	4	Nano 33	701.2578446557187
						9	2	14	1	Nano 33	698.0885285475067
						9	2	14	2	Nano 33	698.0745775370337
						9	2	14	3	Nano 33	752.378856408281
						9	2	17	1	Nano 33	752.7854970621347
						9	2	17	2	Nano 33	732.5750482539514
						9	2	18	1	Nano 33	684.7963246797832
						9	2	18	2	Nano 33	742.8793567718436
						9	2	18	3	Nano 33	776.9025537879655
						11	2	1	1	Nano 29	175.39772453786904
						11	2	1	2	Nano 29	182.1404623348313
						11	2	1	3	Nano 29	187.70393226983387
						11	2	1	4	Nano 29	180.6680982332176
						11	2	1	5	Nano 29	175.40813523786113
						11	2	2	2	Nano 29	174.1297346919844
						11	2	2	3	Nano 29	183.13922338352899
						11	2	2	4	Nano 29	177.5280239448701
						11	2	2	5	Nano 29	181.3643004941736
						11	2	2	6	Nano 29	172.7488591191394
						11	2	3	2	Nano 29	193.0760884932423
						11	2	3	3	Nano 29	180.128694188991
						11	2	4	2	Nano 29	169.99682759615197
						11	2	4	3	Nano 29	174.78338483604716
						11	2	4	4	Nano 29	184.1680953138784
						11	2	4	5	Nano 29	229.52761785764537
						11	2	4	6	Nano 29	177.07661089162684
						11	2	4	7	Nano 29	182.88993638665488
						11	2	5	4	Nano 29	193.7542519568097
						11	2	5	5	Nano 29	181.9830074130321
						11	2	5	6	Nano 29	177.12159176337673
						11	2	6	3	Nano 29	179.35065623863446
						11	2	6	4	Nano 29	179.44599213234798
						11	2	8	4	Nano 29	180.63474069337082
						11	2	8	5	Nano 29	179.83185754692528
						11	2	1	1	Nano 37	697.9722231558168
						11	2	1	2	Nano 37	694.0526211962523
						11	2	1	3	Nano 37	711.3163944692293
						11	2	1	4	Nano 37	687.0917626045684
						11	2	1	5	Nano 37	698.4106536979468
						11	2	2	2	Nano 37	699.940662108069
						11	2	2	3	Nano 37	694.3709392850583
						11	2	2	4	Nano 37	699.6288655392998
						11	2	2	5	Nano 37	711.3730109704921
						11	2	2	6	Nano 37	700.3266530258693
						11	2	3	2	Nano 37	734.0103321634513
						11	2	3	3	Nano 37	710.6134763227885
						11	2	4	2	Nano 37	694.4071406112773
						11	2	4	3	Nano 37	710.558054687063
						11	2	4	4	Nano 37	693.8646582152377
						11	2	4	5	Nano 37	763.7748903177753
						11	2	4	6	Nano 37	706.614474296473
						11	2	4	7	Nano 37	703.7129011091098
						11	2	5	4	Nano 37	728.5255689750028
						11	2	5	5	Nano 37	702.2891810935257
						11	2	5	6	Nano 37	703.9803491909893
						11	2	6	3	Nano 37	702.6996412964944
						11	2	6	4	Nano 37	698.9012663024487
						11	2	8	4	Nano 37	704.6636884701873
						11	2	8	5	Nano 37	700.0237041631842
						13	1	2	3	Nano 30	179.60518490813263
						13	1	2	4	Nano 30	175.1976922341271
						13	1	2	5	Nano 30	171.5301430143127
						13	1	2	6	Nano 30	170.71782255471675
						13	1	3	4	Nano 30	178.8974561664173
						13	1	3	5	Nano 30	176.0671578500668
						13	1	4	3	Nano 30	171.3249079362899
						13	1	4	4	Nano 30	168.16704133768027
						13	1	6	1	Nano 30	171.93356326259055
						13	1	6	2	Nano 30	167.6651676424369
						13	1	6	3	Nano 30	176.06958610542614
						13	1	12	1	Nano 30	168.10290978281478
						13	1	12	2	Nano 30	182.38130555081176
						13	1	12	3	Nano 30	179.2720628973191
						13	1	13	2	Nano 30	176.12174453071842
						13	1	13	3	Nano 30	175.0959801410593
						13	1	13	4	Nano 30	168.50455757195346
						13	1	17	4	Nano 30	184.9301190660772
						13	1	17	5	Nano 30	181.1508212348457
						13	1	17	6	Nano 30	191.619051797538
						13	1	17	7	Nano 30	206.72928386081446
						13	1	18	7	Nano 30	181.46952989842103
						13	1	18	8	Nano 30	193.60875878018902
						13	1	19	2	Nano 30	179.29033582767775
						13	1	19	3	Nano 30	173.83819701062282
						13	1	19	4	Nano 30	177.92040750749248
						13	1	20	12	Nano 30	223.55744173521717
						13	1	20	13	Nano 30	176.71914441469085
						13	1	2	3	Nano 33	663.0910540791025
						13	1	2	4	Nano 33	690.4710499950697
						13	1	2	5	Nano 33	666.6223277269876
						13	1	2	6	Nano 33	705.0860024868649
						13	1	3	4	Nano 33	693.4245190128081
						13	1	3	5	Nano 33	671.4258045008277
						13	1	4	3	Nano 33	679.8971687033644
						13	1	4	4	Nano 33	670.271190645333
						13	1	6	1	Nano 33	623.8411818730939
						13	1	6	2	Nano 33	679.6522668535279
						13	1	6	3	Nano 33	675.082932206039
						13	1	12	1	Nano 33	661.9396010091242
						13	1	12	2	Nano 33	707.6760098101994
						13	1	12	3	Nano 33	669.9943994431486
						13	1	13	2	Nano 33	698.7747346074983
						13	1	13	3	Nano 33	661.5587335942993
						13	1	13	4	Nano 33	694.1429777509093
						13	1	17	4	Nano 33	681.1453525336335
						13	1	17	5	Nano 33	679.1436919389466
						13	1	17	6	Nano 33	685.4150583266482
						13	1	17	7	Nano 33	719.9123504989328
						13	1	18	7	Nano 33	659.7286302955413
						13	1	18	8	Nano 33	669.6195399539346
						13	1	19	2	Nano 33	679.3481459791291
						13	1	19	3	Nano 33	670.4793024206845
						13	1	19	4	Nano 33	673.2942210044426
						13	1	20	12	Nano 33	739.3280905096627
						13	1	20	13	Nano 33	694.6126164105881
						15	1	3	5	Nano 30	181.78219537012646
						15	1	3	6	Nano 30	185.7946273793636
						15	1	3	7	Nano 30	176.48719787664677
						15	1	4	5	Nano 30	259.015103483014
						15	1	4	6	Nano 30	190.16519678055832
						15	1	5	1	Nano 30	187.60177439159386
						15	1	5	2	Nano 30	179.72157852365604
						15	1	6	1	Nano 30	177.7976655469318
						15	1	6	2	Nano 30	179.7282635827375
						15	1	6	3	Nano 30	175.88064187765946
						15	1	6	4	Nano 30	183.17105175190304
						15	1	7	1	Nano 30	182.43393152635468
						15	1	7	2	Nano 30	176.57461519595563
						15	1	7	3	Nano 30	176.4322104458823
						15	1	8	1	Nano 30	182.8198256149089
						15	1	8	2	Nano 30	201.47726703643625
						15	1	8	3	Nano 30	180.04775157554175
						15	1	9	1	Nano 30	179.13836166666889
						15	1	9	2	Nano 30	193.4225523222101
						15	1	9	3	Nano 30	183.72825368020287
						15	1	9	4	Nano 30	182.2260923825984
						15	1	9	5	Nano 30	186.70507088624348
						15	1	10	7	Nano 30	186.11554297980743
						15	1	10	8	Nano 30	185.93444622967297
						15	1	10	9	Nano 30	182.0500467050499
						15	1	11	3	Nano 30	186.84768593438872
						15	1	11	4	Nano 30	188.75902723560986
						15	1	11	5	Nano 30	184.72609841728183
						15	1	3	5	Nano 37	696.045015076361
						15	1	3	6	Nano 37	698.7717487164169
						15	1	3	7	Nano 37	679.3800805939417
						15	1	4	5	Nano 37	763.2831823241977
						15	1	4	6	Nano 37	687.6861535436385
						15	1	5	1	Nano 37	678.3332283208829
						15	1	5	2	Nano 37	676.9791888752824
						15	1	6	1	Nano 37	686.4640951449572
						15	1	6	2	Nano 37	678.1622207945851
						15	1	6	3	Nano 37	678.816006926616
						15	1	6	4	Nano 37	691.8260836782717
						15	1	7	1	Nano 37	683.2753511774214
						15	1	7	2	Nano 37	671.0749617332451
						15	1	7	3	Nano 37	672.4114823418928
						15	1	8	1	Nano 37	695.8700394054549
						15	1	8	2	Nano 37	715.5776504680106
						15	1	8	3	Nano 37	691.0534436341353
						15	1	9	1	Nano 37	684.1015322802273
						15	1	9	2	Nano 37	705.7234529160187
						15	1	9	3	Nano 37	678.6725084385325
						15	1	9	4	Nano 37	694.9066993225447
						15	1	9	5	Nano 37	685.540419096578
						15	1	10	7	Nano 37	698.0084335479364
						15	1	10	8	Nano 37	691.1325331080513
						15	1	10	9	Nano 37	675.287411210237
						15	1	11	3	Nano 37	699.1792442671688
						15	1	11	4	Nano 37	693.0675019092313
						15	1	11	5	Nano 37	684.4500608265855
