# Supplementary material for: Nanobodies combined with DNA-PAINT super-resolution reveal a staggered titin nanoarchitecture in flight muscles
Source: eLife journal article supplement (doi:10.7554/elife.79344), 2022-12-13
Supplement: supp [file elife-79344-supp-v1.zip › elife_poa_e79344_Figure_5_source_data_1.xlsx]

## Sheet: Fig_5
	sample	year	fly_number	selection	zdisk	nanobody_1	nanobody_2	band_distance_nano1	band_distance_nano2		Imaging conditions:
	1	2020	1	7	3	Nano 42	Nano 2	193.42699009381906	108.81060172562971		Sample	Nanobody	Power	Imager	Exposure	# Frames	Dye
	1	2020	1	7	4	Nano 42	Nano 2	213.57722102431512	108.34693768789124		1	Nano 42	50 mW	P1 2 nM	100 ms	15000	Atto643
	1	2020	1	10	3	Nano 42	Nano 2	205.5830833424469	103.28711877586348		1	Nano 2	50 mW	P3 2 nM	100 ms	15000	Cy3B
	1	2020	1	10	4	Nano 42	Nano 2	207.7213789854652	116.86151674922256		6	Nano 29	50 mW	P1 2 nM	100 ms	15000	Atto643
	1	2020	1	10	5	Nano 42	Nano 2	209.03864308184936	111.1707744273906		6	Nano 30	50 mW	P3 2 nM	100 ms	15000	Cy3B
	1	2020	1	13	1	Nano 42	Nano 2	182.29141165090854	124.3603801493094		7	Nano 29	50 mW	P1 2 nM	100 ms	15000	Atto643
	1	2020	1	13	2	Nano 42	Nano 2	212.81873030069198	116.14545189303959		7	Nano 33	50 mW	P3 2 nM	100 ms	15000	Cy3B
	1	2020	2	15	3	Nano 42	Nano 2	196.996250736143	123.10720162980118		9	Nano 29	50 mW	PS3 2 nM	100 ms	15000	Atto643
	1	2020	2	15	4	Nano 42	Nano 2	194.864116384976	125.24353031733595		9	Nano 99	50 mW	P3 2 nM	100 ms	15000	Cy3B
	1	2020	2	15	5	Nano 42	Nano 2	201.48254051697742	118.63196204600584		14	Nano 42	50 mW	P1 2 nM	100 ms	15000	Atto643
	1	2020	2	24	5	Nano 42	Nano 2	183.0278481926381	105.66986789715857		14	Nano 30	50 mW	P3 2 nM	100 ms	15000	Cy3B
	1	2020	3	5	8	Nano 42	Nano 2	188.69777994677486	79.17236993841186
	1	2020	3	21	1	Nano 42	Nano 2	200.7587303237726	93.02177645834558
	1	2020	3	21	2	Nano 42	Nano 2	204.56539756477812	87.19107527114102
	6	2020	1	3	2	Nano 29	Nano 30	251.33784017920368	199.76973406486385
	6	2020	1	3	3	Nano 29	Nano 30	228.97024089539863	189.79062950225602
	6	2020	1	3	4	Nano 29	Nano 30	243.11733378802668	184.7149701030051
	6	2020	1	3	5	Nano 29	Nano 30	232.27613077821619	182.98667400317527
	6	2020	1	4	2	Nano 29	Nano 30	252.73002847163244	185.84056348956082
	6	2020	1	5	1	Nano 29	Nano 30	250.99316260224097	191.2778630330339
	6	2020	1	5	2	Nano 29	Nano 30	251.49755935159587	195.9449331135659
	6	2020	1	5	3	Nano 29	Nano 30	251.54345375400246	191.5422344026448
	6	2020	1	5	4	Nano 29	Nano 30	249.7105275312143	190.75034346669202
	6	2020	1	5	5	Nano 29	Nano 30	251.54981433096023	183.27761213578515
	6	2020	1	5	6	Nano 29	Nano 30	251.18779544852174	190.4332088185137
	6	2020	1	10	5	Nano 29	Nano 30	262.07191804441936	209.90438943405917
	6	2020	1	10	6	Nano 29	Nano 30	254.0652909540421	200.30495920396615
	6	2020	1	10	7	Nano 29	Nano 30	254.79308933426069	193.98928455710202
	6	2020	1	10	8	Nano 29	Nano 30	251.14732041407245	181.47931932025784
	6	2020	1	10	9	Nano 29	Nano 30	255.5869231243642	200.26422740231342
	6	2020	1	10	10	Nano 29	Nano 30	260.2477720954255	205.8624748488501
	6	2020	1	10	11	Nano 29	Nano 30	262.13851495241613	201.7944714041613
	6	2020	1	10	12	Nano 29	Nano 30	249.61672068264758	200.25342494259465
	6	2020	1	10	13	Nano 29	Nano 30	247.79486085155102	193.0277551806949
	6	2020	1	12	13	Nano 29	Nano 30	236.99252351164318	181.221350600876
	6	2020	1	12	14	Nano 29	Nano 30	232.74179085480168	192.0477850629635
	6	2020	1	12	15	Nano 29	Nano 30	234.8615708186719	185.6556191225053
	6	2020	1	12	16	Nano 29	Nano 30	239.17144183776767	213.06331443386745
	6	2020	1	12	17	Nano 29	Nano 30	226.05958681530132	169.9706129943161
	6	2020	1	12	18	Nano 29	Nano 30	223.9101798764636	162.24124610964626
	6	2020	1	12	19	Nano 29	Nano 30	234.47422544308893	183.5094744881195
	6	2020	1	12	20	Nano 29	Nano 30	225.3838239948959	169.70863913383027
	6	2020	1	14	12	Nano 29	Nano 30	239.7303580048009	181.39781651512124
	6	2020	1	15	8	Nano 29	Nano 30	220.06572249515244	189.68079338933705
	6	2020	1	15	9	Nano 29	Nano 30	227.96219803774414	208.8630821348789
	6	2020	1	15	10	Nano 29	Nano 30	241.59432689024243	196.8202345341996
	6	2020	1	15	11	Nano 29	Nano 30	222.4207628393782	175.5304524031697
	6	2020	1	15	12	Nano 29	Nano 30	222.47231079857158	186.74696284253517
	6	2020	1	15	13	Nano 29	Nano 30	220.528295081914	177.54663521716907
	6	2020	1	16	11	Nano 29	Nano 30	221.32725193507213	201.76184606923016
	6	2020	1	16	12	Nano 29	Nano 30	225.88563954959167	155.7230569727045
	6	2020	1	16	13	Nano 29	Nano 30	220.42737953565845	182.72256931505748
	6	2020	2	1	7	Nano 29	Nano 30	193.21601506845013	170.93503863222594
	6	2020	2	1	8	Nano 29	Nano 30	194.21114615397158	170.35744521815732
	6	2020	2	1	9	Nano 29	Nano 30	209.9748426706773	160.05026846934268
	6	2020	2	1	10	Nano 29	Nano 30	205.3497641061324	143.37182816133918
	6	2020	2	1	11	Nano 29	Nano 30	196.57766755071748	173.21308933910245
	6	2020	2	1	12	Nano 29	Nano 30	204.42600780251723	155.41735259029053
	6	2020	2	1	13	Nano 29	Nano 30	194.374605132976	167.61069609635229
	6	2020	2	1	14	Nano 29	Nano 30	205.06915190158279	168.37189490441403
	6	2020	2	2	11	Nano 29	Nano 30	201.08346510786015	159.56264344546355
	6	2020	2	2	12	Nano 29	Nano 30	201.0315665037268	169.57883872093987
	6	2020	2	2	13	Nano 29	Nano 30	191.3953933018951	171.08915787495218
	6	2020	2	3	1	Nano 29	Nano 30	202.77176710325298	174.56655222061005
	6	2020	2	3	2	Nano 29	Nano 30	216.09387716819438	173.37605815721946
	6	2020	2	3	3	Nano 29	Nano 30	199.3435586298165	175.1859444800841
	6	2020	2	3	4	Nano 29	Nano 30	207.5381710962056	166.47129432600522
	6	2020	2	3	5	Nano 29	Nano 30	196.8341589732249	162.60357708706752
	6	2020	2	3	6	Nano 29	Nano 30	202.6930223098404	169.1473907164746
	6	2020	2	3	7	Nano 29	Nano 30	192.67296220200225	170.30313724165498
	6	2020	2	3	8	Nano 29	Nano 30	195.45686341419758	172.29570294346274
	6	2020	2	3	9	Nano 29	Nano 30	192.11854987955604	158.9048814435566
	6	2020	2	3	10	Nano 29	Nano 30	190.8276615200458	145.57249618781557
	6	2020	2	3	11	Nano 29	Nano 30	193.58287193370867	156.6421083748628
	6	2020	2	4	3	Nano 29	Nano 30	215.6301396686001	173.2727245618533
	6	2020	2	4	4	Nano 29	Nano 30	213.28998028243302	177.96123866728408
	6	2020	2	4	5	Nano 29	Nano 30	206.1050588430701	153.84622490407253
	6	2020	2	4	6	Nano 29	Nano 30	214.54702777787674	179.6603359140761
	6	2020	2	5	1	Nano 29	Nano 30	218.45467634969486	178.5852859812469
	6	2020	2	5	2	Nano 29	Nano 30	225.78090826550635	163.56200880902372
	6	2020	2	5	3	Nano 29	Nano 30	218.0962843862136	184.2163664336826
	6	2020	2	6	1	Nano 29	Nano 30	222.2835578890659	192.30724405261338
	6	2020	2	6	2	Nano 29	Nano 30	215.49061386999475	181.70134216162128
	6	2020	2	6	3	Nano 29	Nano 30	226.2184984047478	183.2329017322492
	6	2020	2	6	4	Nano 29	Nano 30	213.5834845565482	167.78616705419088
	6	2020	2	6	5	Nano 29	Nano 30	215.04362532514165	166.6340426745451
	6	2020	2	6	6	Nano 29	Nano 30	235.1771345759684	182.42910355944926
	6	2020	2	6	7	Nano 29	Nano 30	210.4227303957433	151.6015597611943
	6	2020	2	6	8	Nano 29	Nano 30	213.14848651611584	170.06740864605945
	6	2020	2	6	9	Nano 29	Nano 30	200.1314098900673	161.86590737544037
	6	2020	2	6	10	Nano 29	Nano 30	204.57899631649585	168.5373220747266
	6	2020	2	6	11	Nano 29	Nano 30	212.043420219012	159.11382234959262
	6	2020	2	6	12	Nano 29	Nano 30	199.82714479052106	168.19205747323792
	6	2020	2	6	13	Nano 29	Nano 30	215.12973632117112	158.29113112680943
	6	2020	2	6	14	Nano 29	Nano 30	205.7003035899271	160.95298836894017
	6	2020	2	7	2	Nano 29	Nano 30	221.39109562790833	171.68019378322882
	6	2020	2	7	3	Nano 29	Nano 30	227.97036754528253	176.22362317745282
	6	2020	2	7	4	Nano 29	Nano 30	219.3236603942151	173.8082673652367
	6	2020	2	7	5	Nano 29	Nano 30	222.75693955494282	175.46840858472007
	6	2020	2	7	6	Nano 29	Nano 30	223.4403779701634	185.98715307741344
	6	2020	2	7	7	Nano 29	Nano 30	207.74014688114903	177.9196268491603
	6	2020	2	7	8	Nano 29	Nano 30	206.83239533477243	176.8373099938998
	6	2020	2	8	8	Nano 29	Nano 30	205.5355448279414	170.52290580953354
	6	2020	2	8	9	Nano 29	Nano 30	216.4563926131817	174.38856429823605
	6	2020	2	8	10	Nano 29	Nano 30	217.06354430803486	177.49705383625385
	6	2020	2	8	11	Nano 29	Nano 30	214.1696491963512	167.55257784083994
	6	2020	2	8	12	Nano 29	Nano 30	211.69338302591086	178.19506012443696
	6	2020	2	8	13	Nano 29	Nano 30	217.88212935244306	170.82365174594432
	6	2020	2	8	14	Nano 29	Nano 30	203.48272437877145	162.24881975968856
	6	2020	2	9	1	Nano 29	Nano 30	248.3667290195188	181.2878422241846
	6	2020	2	9	2	Nano 29	Nano 30	240.18193849689965	190.99611239848832
	6	2020	2	9	3	Nano 29	Nano 30	241.22987680436717	186.5051329442812
	6	2020	2	9	4	Nano 29	Nano 30	233.9569643109596	198.03615067986328
	6	2020	2	10	1	Nano 29	Nano 30	250.40531169052718	187.4138696796076
	6	2020	2	10	2	Nano 29	Nano 30	238.78483920257287	182.884907136766
	6	2020	2	10	3	Nano 29	Nano 30	236.43779087593387	192.0065093596392
	6	2020	2	10	4	Nano 29	Nano 30	234.98714945843486	190.2799189096633
	6	2020	2	10	5	Nano 29	Nano 30	225.70049827789603	177.71882411876038
	6	2020	2	10	6	Nano 29	Nano 30	239.2564577317225	187.93660444041248
	6	2020	2	10	7	Nano 29	Nano 30	234.64344791788082	184.9905134041094
	6	2020	2	10	8	Nano 29	Nano 30	223.91758360595475	167.9202389488708
	6	2020	2	10	9	Nano 29	Nano 30	217.1646062990274	166.02968994945542
	6	2020	2	10	10	Nano 29	Nano 30	215.3153170557908	172.4973405578936
	6	2020	2	10	11	Nano 29	Nano 30	222.79516514304126	178.06305768724712
	6	2020	2	10	12	Nano 29	Nano 30	212.7578249819891	174.5259509818982
	6	2020	2	10	13	Nano 29	Nano 30	215.86227312167526	170.69346802716382
	6	2020	2	10	14	Nano 29	Nano 30	214.20440509883576	183.69126495826717
	6	2020	2	11	1	Nano 29	Nano 30	239.56891838383086	178.5585187992429
	6	2020	2	11	2	Nano 29	Nano 30	242.50934672542527	184.78352356613902
	6	2020	2	11	3	Nano 29	Nano 30	246.46195011895225	177.2315204588834
	6	2020	2	11	4	Nano 29	Nano 30	236.23853223839103	181.0555169619363
	6	2020	2	11	5	Nano 29	Nano 30	234.48189704262646	181.00340595738913
	6	2020	2	11	6	Nano 29	Nano 30	232.49354314582007	178.61239783908303
	6	2020	2	11	7	Nano 29	Nano 30	237.12050200248055	169.7879486074683
	6	2020	2	11	8	Nano 29	Nano 30	236.04978750252738	185.35910191958718
	6	2020	2	11	9	Nano 29	Nano 30	235.28110946512496	190.6588293753004
	6	2020	2	11	10	Nano 29	Nano 30	231.8112017646468	171.89133164513692
	6	2020	2	11	11	Nano 29	Nano 30	219.08734510242425	172.42863953509982
	6	2020	2	11	12	Nano 29	Nano 30	222.19121394008937	170.59851297970283
	6	2020	2	12	1	Nano 29	Nano 30	241.21429172349983	194.65492869759117
	6	2020	2	12	2	Nano 29	Nano 30	233.50493483174455	166.20180055508405
	6	2020	2	12	3	Nano 29	Nano 30	246.45315595139226	184.4296143577948
	6	2020	2	12	4	Nano 29	Nano 30	239.9499929512534	193.40111858745357
	6	2020	2	12	5	Nano 29	Nano 30	243.25374520708846	194.81630653086685
	6	2020	2	12	6	Nano 29	Nano 30	236.16398213988842	177.2839974579275
	6	2020	2	12	7	Nano 29	Nano 30	232.67699427755642	175.48602195496898
	6	2020	2	12	8	Nano 29	Nano 30	231.6674428569985	184.20426617920327
	6	2020	2	12	9	Nano 29	Nano 30	250.98152626390743	183.95496921198628
	6	2020	2	12	10	Nano 29	Nano 30	249.04992358166908	182.4342550982624
	6	2020	2	12	11	Nano 29	Nano 30	243.10553989595803	169.8938751764081
	6	2020	2	12	12	Nano 29	Nano 30	217.4500917150453	179.67223878689197
	6	2020	2	12	13	Nano 29	Nano 30	239.2343699429034	171.23185290000382
	6	2020	2	12	14	Nano 29	Nano 30	238.9560636024617	178.36163644765804
	6	2020	2	13	3	Nano 29	Nano 30	246.9987763253933	187.4056529380286
	6	2020	2	13	4	Nano 29	Nano 30	239.5428938898981	187.6295244134685
	6	2020	2	13	5	Nano 29	Nano 30	234.31296723610905	182.7035463711418
	6	2020	2	13	6	Nano 29	Nano 30	248.47056579857025	207.5247350342781
	6	2020	2	13	7	Nano 29	Nano 30	252.5947207970196	176.77653209629653
	6	2020	2	13	8	Nano 29	Nano 30	229.98320018979598	189.55320496146214
	6	2020	2	13	9	Nano 29	Nano 30	240.3675710755431	182.19653304103215
	6	2020	2	13	10	Nano 29	Nano 30	243.0361847602819	194.27767888042527
	6	2020	2	13	11	Nano 29	Nano 30	228.2947095834703	190.1271596075452
	6	2020	2	14	1	Nano 29	Nano 30	234.9513556470348	188.0147055438849
	6	2020	2	14	2	Nano 29	Nano 30	242.72148515028505	192.4330040283461
	6	2020	2	14	3	Nano 29	Nano 30	235.9363422498194	181.35630525824985
	6	2020	2	14	4	Nano 29	Nano 30	237.23664113058703	179.85609695555794
	6	2020	2	14	5	Nano 29	Nano 30	223.6498303806768	190.18136066734627
	6	2020	2	15	3	Nano 29	Nano 30	234.23433983886062	199.99219572079318
	6	2020	2	15	4	Nano 29	Nano 30	238.2516079069231	189.0883858331472
	6	2020	2	15	5	Nano 29	Nano 30	247.57318095004	173.02276364966758
	6	2020	2	15	6	Nano 29	Nano 30	239.24778423182167	193.77448975159862
	6	2020	2	15	7	Nano 29	Nano 30	252.02641493245892	180.77879477935426
	6	2020	2	15	8	Nano 29	Nano 30	243.8362217628463	194.0339852090784
	6	2020	2	15	9	Nano 29	Nano 30	238.25068493504745	182.38610225157436
	6	2020	2	16	1	Nano 29	Nano 30	233.94266964645198	187.6847724112624
	6	2020	2	16	2	Nano 29	Nano 30	235.7442635420348	181.11107707848763
	6	2020	2	16	3	Nano 29	Nano 30	232.51012552353282	179.26618357706474
	6	2020	2	16	4	Nano 29	Nano 30	232.34214198914933	193.1862687638987
	6	2020	2	16	5	Nano 29	Nano 30	242.20171393529358	172.98169421983002
	6	2020	3	2	7	Nano 29	Nano 30	231.87124241308172	169.51802090813885
	6	2020	3	2	8	Nano 29	Nano 30	247.3226163095279	188.86137823077493
	6	2020	3	2	9	Nano 29	Nano 30	219.3896660390112	197.76856324153385
	6	2020	3	6	2	Nano 29	Nano 30	230.2682996790821	176.39683744569894
	6	2020	3	6	3	Nano 29	Nano 30	229.09641011256267	171.96338191545124
	6	2020	3	6	4	Nano 29	Nano 30	216.45486989623816	172.24468514792218
	6	2020	3	6	5	Nano 29	Nano 30	196.02194800660968	191.84296292036208
	6	2020	3	6	6	Nano 29	Nano 30	224.07202544664668	184.07864998324985
	6	2020	3	6	7	Nano 29	Nano 30	203.5728293672628	161.47205253279336
	6	2020	3	8	4	Nano 29	Nano 30	221.78298273945657	176.15396090849956
	6	2020	3	9	2	Nano 29	Nano 30	199.81206184192104	168.79842727717315
	6	2020	3	9	3	Nano 29	Nano 30	223.86884419604428	174.9816227284215
	6	2020	3	9	4	Nano 29	Nano 30	213.7952200274583	184.417681745946
	6	2020	3	9	5	Nano 29	Nano 30	214.56267466398967	177.9039417271777
	6	2020	3	9	6	Nano 29	Nano 30	208.43175490011558	175.68497187010738
	6	2020	3	9	7	Nano 29	Nano 30	211.01682229351184	185.02448111419227
	6	2020	3	9	8	Nano 29	Nano 30	228.43693640876324	178.63410126546285
	6	2020	3	10	13	Nano 29	Nano 30	225.3770531088287	178.15994022296422
	6	2020	3	10	14	Nano 29	Nano 30	220.18490856775543	164.27054937427044
	6	2020	3	11	4	Nano 29	Nano 30	230.7390420116637	180.4701615061557
	6	2020	3	11	5	Nano 29	Nano 30	226.2951570330367	174.91958989194416
	6	2020	3	11	6	Nano 29	Nano 30	214.84562992822305	174.1551841108233
	6	2020	3	11	7	Nano 29	Nano 30	216.5812307929056	179.01240169816532
	6	2020	3	11	8	Nano 29	Nano 30	223.4982728308344	178.99334494401955
	6	2020	3	11	9	Nano 29	Nano 30	220.56011114512413	184.96853748023426
	6	2020	3	11	10	Nano 29	Nano 30	220.85084694815862	172.0914471496781
	6	2020	3	12	11	Nano 29	Nano 30	226.39322790197468	187.2774122484401
	6	2020	3	14	1	Nano 29	Nano 30	219.4753850203786	183.2387986051756
	6	2020	3	14	2	Nano 29	Nano 30	224.72519313595348	177.25641263248616
	6	2020	3	14	3	Nano 29	Nano 30	225.8783835985272	172.2868927451729
	6	2020	3	14	4	Nano 29	Nano 30	228.31779651976063	180.9775155804729
	6	2020	3	14	5	Nano 29	Nano 30	217.3484331088467	176.9054030361903
	6	2020	3	15	1	Nano 29	Nano 30	219.42299861911079	175.08757039941204
	6	2020	3	15	2	Nano 29	Nano 30	218.68434030603612	183.00109395785893
	6	2020	3	15	3	Nano 29	Nano 30	232.47045959622875	178.86110737631668
	6	2020	3	15	4	Nano 29	Nano 30	231.83943984775726	182.9870147336048
	6	2020	3	15	5	Nano 29	Nano 30	231.37591447193245	175.7021417693444
	6	2020	3	15	6	Nano 29	Nano 30	218.29561649461647	169.24302812783878
	6	2020	3	16	1	Nano 29	Nano 30	229.56903381725826	178.35155684591697
	6	2020	3	16	2	Nano 29	Nano 30	228.49177151260776	183.19226346691968
	6	2020	3	16	3	Nano 29	Nano 30	215.14484042023227	178.8547236639635
	6	2020	3	16	4	Nano 29	Nano 30	224.02360371660168	181.12125085454738
	6	2020	3	16	5	Nano 29	Nano 30	221.77720239466453	176.50252639048645
	6	2020	3	16	6	Nano 29	Nano 30	225.60229855104268	178.74978467435486
	6	2020	3	16	7	Nano 29	Nano 30	229.5146365557269	181.36080293780049
	6	2020	3	16	8	Nano 29	Nano 30	226.28165298368492	174.28331616730674
	6	2020	3	17	3	Nano 29	Nano 30	220.12890364569267	182.07862810279664
	6	2020	3	17	4	Nano 29	Nano 30	218.2165118872858	176.1825501159625
	6	2020	3	19	1	Nano 29	Nano 30	224.5364668939788	173.73302606045777
	6	2020	3	19	2	Nano 29	Nano 30	220.35820621895203	168.75325863148913
	6	2020	3	19	3	Nano 29	Nano 30	228.51654370044685	178.32094960027825
	6	2020	3	19	4	Nano 29	Nano 30	214.39170854642072	159.84329034239863
	6	2020	3	20	1	Nano 29	Nano 30	219.5166520166009	186.33175454055007
	6	2020	3	20	2	Nano 29	Nano 30	212.3065356744973	169.83162781602502
	7	2020	1	2	8	Nano 29	Nano 33	216.09539984913087	716.0981165199559
	7	2020	1	2	9	Nano 29	Nano 33	218.196106088655	690.7663655434328
	7	2020	1	2	10	Nano 29	Nano 33	231.7132165599884	680.8359571186472
	7	2020	1	2	11	Nano 29	Nano 33	227.4893749546487	689.7974272283564
	7	2020	1	3	5	Nano 29	Nano 33	227.5075924783613	669.7416475145462
	7	2020	1	3	6	Nano 29	Nano 33	228.85542435019943	684.529229285726
	7	2020	1	3	7	Nano 29	Nano 33	236.3989802349343	663.6977427679077
	7	2020	1	3	8	Nano 29	Nano 33	221.6572978123554	721.8952164249232
	7	2020	1	3	9	Nano 29	Nano 33	225.90368200865157	691.1623968695067
	7	2020	1	3	10	Nano 29	Nano 33	220.04012065527263	674.440094207605
	7	2020	1	3	11	Nano 29	Nano 33	240.8196521189535	731.1014409499649
	7	2020	1	4	8	Nano 29	Nano 33	229.8551892916507	690.1858792765602
	7	2020	1	4	9	Nano 29	Nano 33	232.0938513942312	694.8807661611336
	7	2020	1	4	10	Nano 29	Nano 33	215.68070055142186	671.8978017342072
	7	2020	1	4	11	Nano 29	Nano 33	212.7518195905504	681.2388136702174
	7	2020	1	4	12	Nano 29	Nano 33	226.69350444729787	722.1844281902281
	7	2020	1	5	5	Nano 29	Nano 33	217.86269197400017	672.6044483526324
	7	2020	1	5	6	Nano 29	Nano 33	227.22433347092502	672.9158464414559
	7	2020	1	5	7	Nano 29	Nano 33	238.94151475326882	707.2388015169148
	7	2020	1	7	6	Nano 29	Nano 33	225.24909350935872	683.5172679168761
	7	2020	1	7	7	Nano 29	Nano 33	211.60197853931263	699.4328986212113
	7	2020	1	7	8	Nano 29	Nano 33	220.73091136482788	696.6447818422699
	7	2020	1	7	9	Nano 29	Nano 33	220.2386877127989	669.8211391529145
	7	2020	1	7	10	Nano 29	Nano 33	214.92128309602487	690.9539116002832
	7	2020	1	10	8	Nano 29	Nano 33	221.70150183718727	694.6999892265123
	7	2020	1	10	9	Nano 29	Nano 33	229.46011067048119	694.643160673638
	7	2020	1	11	10	Nano 29	Nano 33	215.86296494641832	690.7285467551042
	7	2020	1	11	11	Nano 29	Nano 33	219.02026836141945	680.741846315737
	7	2020	1	11	12	Nano 29	Nano 33	230.19034896559617	654.0366996689828
	7	2020	1	11	13	Nano 29	Nano 33	216.28287114116856	681.4659455679018
	7	2020	1	11	14	Nano 29	Nano 33	223.8994768120148	675.4680952183908
	7	2020	1	11	15	Nano 29	Nano 33	212.8377334552147	714.1303809757619
	7	2020	1	12	6	Nano 29	Nano 33	211.258461165362	668.3280385311092
	7	2020	1	12	7	Nano 29	Nano 33	219.46574038243256	673.0422202023581
	7	2020	1	13	1	Nano 29	Nano 33	224.881558619148	640.6578710343621
	7	2020	1	13	2	Nano 29	Nano 33	220.77729632541957	686.2393055383641
	7	2020	1	13	3	Nano 29	Nano 33	218.41478149510704	671.3633992770866
	7	2020	1	13	4	Nano 29	Nano 33	220.01735887528545	663.957900117757
	7	2020	1	14	4	Nano 29	Nano 33	224.2612449430761	702.5737200815988
	7	2020	1	14	5	Nano 29	Nano 33	222.48437273430085	686.9801160676218
	7	2020	1	14	6	Nano 29	Nano 33	214.93789166387901	690.7756512032463
	7	2020	1	16	10	Nano 29	Nano 33	222.69152549753102	712.8331278030333
	7	2020	1	16	11	Nano 29	Nano 33	213.362773388692	687.5344165932381
	7	2020	1	17	6	Nano 29	Nano 33	217.53879558223758	691.6793704852205
	7	2020	1	17	7	Nano 29	Nano 33	221.11670034844195	666.6138886340318
	7	2020	1	17	8	Nano 29	Nano 33	211.7925011253584	676.610022452759
	7	2020	1	21	6	Nano 29	Nano 33	206.8611030545153	625.4306311827759
	7	2020	1	21	7	Nano 29	Nano 33	220.44034895072602	688.6941210392104
	7	2020	1	21	8	Nano 29	Nano 33	218.50003335524207	674.9834170451434
	7	2020	3	8	4	Nano 29	Nano 33	228.3647482596547	783.1539651875595
	7	2020	3	8	5	Nano 29	Nano 33	226.47987345583888	705.0841173244249
	7	2020	3	8	6	Nano 29	Nano 33	219.84991477132786	658.9159951837115
	9	2020	1	2	6	Nano 39	Nano 29	189.7985808629372	223.91541591276481
	9	2020	1	2	7	Nano 39	Nano 29	184.02856631332585	218.4367140082037
	9	2020	1	2	8	Nano 39	Nano 29	188.4616394664897	225.4603004251993
	9	2020	1	4	7	Nano 39	Nano 29	201.59311816153087	244.06688879902845
	9	2020	1	4	8	Nano 39	Nano 29	203.58822956980396	219.92382953278764
	9	2020	1	13	1	Nano 39	Nano 29	198.71029778377337	236.8954910535787
	9	2020	1	13	2	Nano 39	Nano 29	202.3034012786604	223.91652765972717
	9	2020	1	13	3	Nano 39	Nano 29	204.1331590579088	241.366208634673
	9	2020	1	13	4	Nano 39	Nano 29	207.81796724883225	234.6198922131414
	9	2020	1	13	5	Nano 39	Nano 29	198.42757800378865	246.7085268847403
	9	2020	2	7	4	Nano 39	Nano 29	201.7505547776973	226.9111401230496
	9	2020	2	7	5	Nano 39	Nano 29	206.02533381780688	236.52946169318628
	9	2020	2	7	6	Nano 39	Nano 29	204.7829031336525	234.44268660087917
	9	2020	2	7	7	Nano 39	Nano 29	193.11387770972766	233.3353952373193
	9	2020	2	7	8	Nano 39	Nano 29	193.40269701720814	243.1830550309797
	9	2020	2	11	2	Nano 39	Nano 29	207.87869981006523	268.14533709189755
	9	2020	2	14	4	Nano 39	Nano 29	211.43659400055725	235.6740805330645
	9	2020	2	14	5	Nano 39	Nano 29	213.31905249846145	235.13536697041332
	9	2020	2	15	1	Nano 39	Nano 29	195.14648815840144	248.277123415696
	9	2020	2	15	2	Nano 39	Nano 29	191.31365137162624	232.59702909244442
	9	2020	2	15	3	Nano 39	Nano 29	201.3072330010651	220.01612323843602
	14	2020	1	3	6	Nano 42	Nano 30	177.7390815184293	165.01896402703662
	14	2020	1	3	7	Nano 42	Nano 30	190.7388185900203	165.87715342080003
	14	2020	1	3	8	Nano 42	Nano 30	180.86809969632068	164.2689103716262
	14	2020	1	3	9	Nano 42	Nano 30	183.4534377632042	169.7362914005805
	14	2020	1	3	10	Nano 42	Nano 30	183.3385554790129	159.80224555972256
	14	2020	1	3	11	Nano 42	Nano 30	190.85947637400352	175.67192682375438
	14	2020	1	3	12	Nano 42	Nano 30	185.1302944322123	173.92795031924152
	14	2020	1	3	13	Nano 42	Nano 30	194.26673050953133	174.04396209491384
	14	2020	1	4	9	Nano 42	Nano 30	180.972510411913	166.73399398915365
	14	2020	1	4	10	Nano 42	Nano 30	175.4268526605867	166.49537294758002
	14	2020	1	4	11	Nano 42	Nano 30	185.85890622254112	173.23773093170414
	14	2020	1	4	12	Nano 42	Nano 30	172.34416621455296	183.40130679778267
	14	2020	1	4	13	Nano 42	Nano 30	184.09729309888462	164.0013549220737
	14	2020	1	7	5	Nano 42	Nano 30	176.58939930440133	159.08411478893413
	14	2020	1	7	6	Nano 42	Nano 30	176.9795449326972	171.29846291148257
	14	2020	1	7	7	Nano 42	Nano 30	191.23675395227247	172.29325359546348
	14	2020	1	7	8	Nano 42	Nano 30	179.96715366167564	159.8580715937149
	14	2020	1	7	9	Nano 42	Nano 30	188.38386688547385	160.25503673981405
	14	2020	1	19	3	Nano 42	Nano 30	181.0993685773677	147.4574733789674
	14	2020	1	19	4	Nano 42	Nano 30	180.16576664219542	174.338524821072
	14	2020	1	19	5	Nano 42	Nano 30	171.33656329237184	161.2078742807023
	14	2020	1	19	6	Nano 42	Nano 30	184.81555586150702	156.17159920926497
	14	2020	1	19	7	Nano 42	Nano 30	173.62468842087426	182.68322974701215
	14	2020	1	19	8	Nano 42	Nano 30	175.91361855356124	172.7006115968291
	14	2020	1	20	6	Nano 42	Nano 30	180.47802828511158	190.8066912565826
	14	2020	1	20	7	Nano 42	Nano 30	197.47100784533103	183.0634846563527
	14	2020	2	3	4	Nano 42	Nano 30	199.01987359600412	195.20913071992027
	14	2020	2	3	5	Nano 42	Nano 30	221.67124345771683	192.92275616113685
	14	2020	2	5	6	Nano 42	Nano 30	218.2836198600336	195.5404427491851
	14	2020	2	7	4	Nano 42	Nano 30	211.02557416632263	172.76887953555075
	14	2020	2	7	5	Nano 42	Nano 30	208.61916928269463	193.23680187702323
	14	2020	2	7	6	Nano 42	Nano 30	206.7906527456023	178.68712789731063
	14	2020	2	8	4	Nano 42	Nano 30	191.29361663073917	169.95513778998742
	14	2020	2	8	5	Nano 42	Nano 30	199.55869294150799	184.70421425900355
	14	2020	2	13	3	Nano 42	Nano 30	205.72509920410297	204.0481949071321
	14	2020	2	15	3	Nano 42	Nano 30	209.60328021249254	185.15505131727815
	14	2020	2	15	4	Nano 42	Nano 30	202.97704336759185	180.89014589198285
	14	2020	2	15	5	Nano 42	Nano 30	202.80181837010798	197.1744759420824
	14	2020	2	17	9	Nano 42	Nano 30	210.08768640954145	189.35420826636062
	14	2020	2	18	2	Nano 42	Nano 30	198.09906576842155	182.17058208893872
	14	2020	2	18	3	Nano 42	Nano 30	209.4135238274144	188.45604875952455
	14	2020	2	18	4	Nano 42	Nano 30	226.92415072436887	222.87875719942008
	14	2020	2	21	3	Nano 42	Nano 30	207.6985568042857	197.52631856560527
	14	2020	2	21	4	Nano 42	Nano 30	214.99409796153896	206.12283792072915
	14	2020	2	21	5	Nano 42	Nano 30	211.9404668883651	173.2800506569886
