# Supplementary material for: Nanobodies combined with DNA-PAINT super-resolution reveal a staggered titin nanoarchitecture in flight muscles
Source: eLife journal article supplement (doi:10.7554/elife.79344), 2022-12-13
Supplement: supp [file elife-79344-supp-v1.zip › elife_poa_e79344_Figure_6_source_data_1.xlsx]

## Sheet: summary all data
Nano1	Nano2	oligo1	oligo2	Dye1	Dye2	day	sample#	FOV	nb_zdisks_nano1	nb_zdisks_nano2	common Z-disks	nb sarc1	nb sarc2
Nano 2	Nano 35	P3	P3	Cy3B	Cy3B	191029	5	1	59	59	59	39	39
Nano 2	Nano 33	P3	P3	Cy3B	Cy3B	191030	4	1	10	10	10	2	2
Nano 2	Nano 33	P3	P3	Cy3B	Cy3B	191030	4	2	34	34	34	14	14
Nano 2	Nano 37	P3	P3	Cy3B	Cy3B	191101	6	1	3	3	3	1	1
Nano 2	Nano 42	P3	P1	Cy3b	Atto643	200818	1	1	10	33	7	4	11
Nano 2	Nano 42	P3	P1	Cy3b	Atto643	200818	1	2	15	64	4	3	38
Nano 2	Nano 42	P3	P1	Cy3b	Atto643	200818	1	3	84	8	3	40	0
Nano 29	Nano 35	P3	P3	Cy3B	Cy3B	191031	10	1	13	13	13	3	3
Nano 29	Nano 33	P3	P3	Cy3B	Cy3B	191103	9	2	35	35	35	11	11
Nano 29	Nano 37	P3	P3	Cy3B	Cy3B	191103	11	2	25	25	25	11	11
Nano 29	Nano 30	P1	P3	Atto643	Cy3b	200819	6	1	89	57	38	59	33
Nano 29	Nano 30	P1	P3	Atto643	Cy3b	200819	6	2	168	140	127	136	108
Nano 29	Nano 30	P1	P3	Atto643	Cy3b	200819	6	3	76	117	54	46	79
Nano 29	Nano 33	P1	P3	Atto643	Cy3b	200820	7	1	221	59	49	177	25
Nano 29	Nano 33	P1	P3	Atto643	Cy3b	200820	7	3	26	7	3	12	1
Nano 29	Nano 46	PS3	P3	Cy3b	Atto643	200820	8	1	50	4	4	24	0
Nano 29	Nano 46	PS3		Cy3b		200820	8	2	6	0	0	2	0
Nano 29	Nano 46	PS3		Cy3b		200820	8	3	37	0	0	13	0
Nano 29	Nano 39	PS3	P3	Cy3b	Atto643	200821	9	1	18	48	10	8	28
Nano 29	Nano 39	PS3	P3	Cy3b	Atto643	200821	9	2	16	34	11	6	16
Nano 30	Nano 35	P3	P3	Cy3B	Cy3B	191101	14	1	17	17	17	5	5
Nano 30	Nano 33	P3	P3	Cy3B	Cy3B	191103	13	1	28	28	28	8	8
Nano 30	Nano 37	P3	P3	Cy3B	Cy3B	191103	15	1	28	28	28	10	10
Nano 30		P3		Atto643		200819	3	1	35	0	0	21	0
Nano 30	Nano 42	P3	P1	Cy3b	Atto643	200821	14	1	92	46	26	64	30
Nano 30	Nano 42	P3	P1	Cy3b	Atto643	200821	14	2	94	32	19	54	12
Nano 30	Nano 42	P3		Cy3b		200821	14	3	66	0	0	36	0
Nano 30		P3		Cy3b		200821	14b	2	113	0	0	81	0
Nano 35	Nano 39	P3	P3	Cy3B	Cy3B	191101	17	1	3	3	3	1	1
Nano 35	Nano 39	P3	P3	Cy3B	Cy3B	191102	17	2	63	63	63	31	31
Nano 39		P3		Cy3b		200818	2	1	19	0	0	3	0

## Sheet: Fig_6
nanobody	avg_distance					Nb of Z-disk extracted for each nanobody	Number of sarcomere for each nanobody	Number of animals
Nano 2	51.590714523891855
Nano 2	51.298347574815566				Nano 2	215	103	7
Nano 2	51.12266878968702				Nano 39	167	79	5
Nano 2	50.61634384104116				Nano 30	787	499	11
Nano 2	51.205820167412604				Nano 29	780	508	13
Nano 2	51.14325665356369				Nano 33	173	61	5
Nano 2	49.19739541153579				Nano 35	155	79	5
Nano 2	50.89817973081463				Nano 37	56	22	3
Nano 2	50.287651149212834				Nano 42	183	91	6
Nano 2	50.86725688369579
Nano 2	50.26659169312454
Nano 2	51.29588891836475
Nano 2	50.843704485803904
Nano 2	51.503643219866255
Nano 2	50.7597811929121
Nano 2	50.58607908156085
Nano 2	49.993218705403656
Nano 2	50.00045022874032
Nano 2	51.03091714727967
Nano 2	50.29668439966691
Nano 2	51.25972645656985
Nano 2	51.16973982433508
Nano 2	51.08984624545941
Nano 2	51.13651185142883
Nano 2	50.776673405702184
Nano 2	51.264669335878054
Nano 2	50.30182320089763
Nano 2	51.74712745828653
Nano 2	52.65655428870515
Nano 2	50.74575914195238
Nano 2	50.491122703485054
Nano 2	51.071248400740025
Nano 2	50.80469754822963
Nano 2	51.00283394864221
Nano 2	50.7180287829358
Nano 2	50.83729527262347
Nano 2	51.504646576798386
Nano 2	50.483603631914875
Nano 2	51.20617184076947
Nano 2	50.39970532788538
Nano 2	51.13651530993541
Nano 2	50.67981177452193
Nano 2	51.23854997482856
Nano 2	49.94389863807976
Nano 2	51.35070523615946
Nano 2	50.254005688888974
Nano 2	51.124156504275255
Nano 2	50.22614801046095
Nano 2	51.54624474377726
Nano 2	50.51549852072303
Nano 2	50.77082616710578
Nano 2	50.68142836894013
Nano 2	51.32988959829182
Nano 2	51.16052873446088
Nano 2	50.99914004398447
Nano 2	51.41779428033194
Nano 2	51.48219646230215
Nano 2	51.125153972911804
Nano 2	51.09210532570414
Nano 2	50.32101901322669
Nano 2	50.76526712830115
Nano 2	50.945002080181915
Nano 2	51.220320582734644
Nano 2	50.164035241670575
Nano 2	50.96162166179326
Nano 2	50.931556005982145
Nano 2	50.45706817054633
Nano 2	50.94172016805196
Nano 2	50.63362163367267
Nano 2	50.16724676784667
Nano 2	50.76557423528262
Nano 2	51.47853928968749
Nano 2	50.95789650993553
Nano 2	51.61264882102482
Nano 2	51.13153067182493
Nano 2	49.62345926136507
Nano 2	50.98198046169422
Nano 2	49.56657454061149
Nano 2	50.33924163506209
Nano 2	50.47119925735389
Nano 2	51.47814869987601
Nano 2	49.99723970348465
Nano 2	50.038319878472336
Nano 2	51.54213601243661
Nano 2	51.26903040806548
Nano 2	51.0961072060286
Nano 2	50.93506864030322
Nano 2	51.55008646912347
Nano 2	50.40303331426738
Nano 2	51.56303373265761
Nano 2	51.39668196270704
Nano 2	51.19809582923356
Nano 2	50.399737327638604
Nano 2	50.77361554367056
Nano 2	50.382466859708714
Nano 2	50.51226510449872
Nano 2	50.79643840831646
Nano 2	51.432145850277735
Nano 2	50.9878444973211
Nano 2	51.33514206397265
Nano 2	50.95624862476696
Nano 2	51.325907151407016
Nano 2	50.5427624825098
Nano 2	50.808979016313714
Nano 2	50.88599500120922
Nano 2	50.50313501480537
Nano 2	50.40644916113044
Nano 2	51.13403422108973
Nano 2	50.89584700780657
Nano 2	51.546160398206084
Nano 2	50.87865396630786
Nano 2	50.808238172265675
Nano 2	51.50167266419941
Nano 2	50.82789362805747
Nano 2	50.8978455963973
Nano 2	51.34285868215232
Nano 2	51.05659534739785
Nano 2	50.55660865850218
Nano 2	51.16004319229387
Nano 2	51.29670312454564
Nano 2	49.171205426294264
Nano 2	51.07643017900795
Nano 2	50.56147080448803
Nano 2	50.16561430958282
Nano 2	50.82297990828188
Nano 2	50.258227860192555
Nano 2	50.721947275520236
Nano 2	51.39049467682629
Nano 2	50.83002139193047
Nano 2	51.50087035426551
Nano 2	50.54195231350315
Nano 2	51.04578754485322
Nano 2	49.93950472768742
Nano 2	50.76524135872644
Nano 2	51.116182865902104
Nano 2	50.616930340203204
Nano 2	51.530598213525685
Nano 2	52.06523534546667
Nano 2	51.338949668636246
Nano 2	51.06275022914222
Nano 2	50.94025234107115
Nano 2	50.48802509399089
Nano 2	50.51127098753431
Nano 2	51.419192814052565
Nano 2	50.98428896554854
Nano 2	49.385528022521974
Nano 2	51.644723401788575
Nano 2	50.80653476669977
Nano 2	51.18100274517265
Nano 2	50.78911583856036
Nano 2	51.12035811263531
Nano 2	50.86959201390544
Nano 2	50.95457884875599
Nano 2	50.737494447292
Nano 2	51.34283801835072
Nano 2	51.05423297306352
Nano 2	51.18235597754779
Nano 2	51.10903692547494
Nano 2	51.453943141612186
Nano 2	49.96876882536867
Nano 2	51.045893654074874
Nano 2	50.847013656184174
Nano 2	50.4829116382292
Nano 2	50.37120355522286
Nano 2	50.55833706181333
Nano 2	51.096156671841435
Nano 2	50.636240842044124
Nano 2	50.69383804669006
Nano 2	50.47868655895082
Nano 2	51.262555253061926
Nano 2	51.46116472380991
Nano 2	50.479695375294554
Nano 2	51.1079117331867
Nano 2	51.22507805199907
Nano 2	51.235176173789355
Nano 2	50.38259447458502
Nano 2	50.859555025938505
Nano 2	51.455767287570794
Nano 2	52.11602406356603
Nano 2	50.730903377688456
Nano 2	51.257203180045735
Nano 2	50.55401832260878
Nano 2	50.34391026128097
Nano 2	50.84220818117508
Nano 2	50.24477951102873
Nano 2	51.27686537974903
Nano 2	51.16263573133339
Nano 2	51.06082709675578
Nano 2	50.564809705436396
Nano 2	50.17795721487647
Nano 2	50.82257934574542
Nano 2	50.285848242340954
Nano 2	51.5409183377608
Nano 2	49.928701846228904
Nano 2	51.34049933507458
Nano 2	50.08716303206915
Nano 2	50.6379874513417
Nano 2	50.835759377181105
Nano 2	51.1118350715869
Nano 2	50.669128018986406
Nano 2	50.58915595425943
Nano 2	51.57521116957108
Nano 2	51.13644999906336
Nano 2	50.43108333613958
Nano 2	51.40724382483526
Nano 2	50.92354383519617
Nano 2	50.21867423163863
Nano 2	51.317974006227246
Nano 2	51.1087835740499
Nano 2	50.136824657644006
Nano 2	50.99807320240984
Nano 2	50.70387512303799
Nano 2	51.146301614961516
Nano 2	50.106931650045965
Nano 2	51.49623888762195
Nano 2	51.393384794281886
Nano 2	50.23608386576721
Nano 2	51.659455695768
Nano 2	50.75981224037867
Nano 2	50.90316791596777
Nano 2	51.21031786191653
Nano 2	50.769354416907326
Nano 2	50.77027595494043
Nano 2	51.93990973027651
Nano 2	52.60750791795168
Nano 2	51.0755043786925
Nano 2	50.358662826625824
Nano 2	51.66773444416924
Nano 2	50.96780547248702
Nano 2	51.31772095919577
Nano 2	49.971876639507855
Nano 2	50.3816999157383
Nano 2	50.74216953105431
Nano 2	50.749611838751385
Nano 2	51.20805867427495
Nano 2	51.345295566893
Nano 2	50.66526589672906
Nano 2	51.47720379671525
Nano 2	50.68399937717502
Nano 2	50.35064947817982
Nano 2	51.51788819371946
Nano 2	51.8191364604396
Nano 2	50.40571952065647
Nano 2	50.27260744299136
Nano 2	50.69531140933424
Nano 2	51.550192940274
Nano 2	51.206968768004685
Nano 2	51.033227231778994
Nano 2	50.91814067732914
Nano 2	50.0328880566441
Nano 2	51.07690072095447
Nano 2	51.611047489938365
Nano 2	50.70098298790827
Nano 2	51.03491313971121
Nano 2	50.72196393668613
Nano 2	50.50984142235291
Nano 2	50.307455411412626
Nano 2	50.65007429894614
Nano 2	50.4553501501441
Nano 2	50.68272950278592
Nano 2	51.82951315153812
Nano 2	50.257003731472146
Nano 2	50.88904750788119
Nano 2	50.656280491302596
Nano 2	50.83506038887119
Nano 2	50.85963623441795
Nano 2	51.59373468093318
Nano 2	51.059797653835204
Nano 2	51.39753159465077
Nano 2	50.981345374970736
Nano 2	51.40631919647142
Nano 2	51.47423455346973
Nano 2	51.29360876716459
Nano 2	50.78899929146046
Nano 2	51.102470412435785
Nano 2	51.16742723661522
Nano 2	50.08075396400234
Nano 2	50.32611458934586
Nano 2	50.949694785793554
Nano 2	51.82597174521287
Nano 2	50.67713510784533
Nano 2	51.190727463367175
Nano 2	51.30725616285551
Nano 2	50.88527222535
Nano 2	49.89959350436581
Nano 2	51.10396960445081
Nano 2	50.641525838527336
Nano 2	51.08707209533845
Nano 2	49.991532665011206
Nano 2	51.07154167379289
Nano 2	51.21923869248452
Nano 2	51.24261275648248
Nano 2	50.784544591505494
Nano 2	51.17055237776311
Nano 2	50.48974038021958
Nano 2	50.40953087739083
Nano 2	49.825373426705056
Nano 2	50.967977182747774
Nano 2	50.433308594563634
Nano 2	51.231163108599375
Nano 2	51.73528198085605
Nano 2	51.30308438897169
Nano 2	50.68855763238056
Nano 2	50.41671906161096
Nano 2	51.74479771887092
Nano 2	50.754317108443196
Nano 2	50.24820586658488
Nano 2	51.57947933328298
Nano 2	50.76618385214854
Nano 2	51.50429045104985
Nano 2	50.568055837423266
Nano 2	50.978936472146394
Nano 2	50.880826722638666
Nano 2	50.90312034837872
Nano 2	50.99782123382815
Nano 2	51.71915246533989
Nano 2	51.34703175693704
Nano 2	50.30261324919465
Nano 2	50.98261891473629
Nano 2	50.78436325647956
Nano 2	51.301802332759
Nano 2	50.05545475256135
Nano 2	51.39679531874555
Nano 2	51.20957181395937
Nano 2	51.17594983209898
Nano 2	50.08716984357676
Nano 2	51.04078256096577
Nano 2	51.76539536815045
Nano 2	50.9994557597445
Nano 2	51.42844635677293
Nano 2	52.07367342831111
Nano 2	49.17293119253203
Nano 2	51.29872097879533
Nano 2	50.87781825164226
Nano 2	50.936154564338466
Nano 2	50.5290771419441
Nano 2	51.64558414421207
Nano 2	50.94783000550382
Nano 2	51.79941789495013
Nano 2	50.349470328739244
Nano 2	51.14074100086771
Nano 2	51.73758701362645
Nano 2	50.468792730554775
Nano 2	51.410697321833105
Nano 2	51.5357968981209
Nano 2	50.878113821874905
Nano 2	51.45882785810876
Nano 2	50.394030657284816
Nano 2	51.53145072413413
Nano 2	51.58499240366738
Nano 2	52.18426249120027
Nano 2	51.55597768145827
Nano 2	50.311649227627626
Nano 2	49.717594932876956
Nano 2	51.5087705309739
Nano 2	49.80924423581107
Nano 2	52.06904733459564
Nano 2	50.87695066435381
Nano 2	51.07417791340555
Nano 2	51.751307776384934
Nano 2	50.35052219787577
Nano 2	50.70508119429942
Nano 2	50.79277333590956
Nano 2	50.58603440335187
Nano 2	51.108692156027175
Nano 2	51.00807035137663
Nano 2	50.686875442199415
Nano 2	51.64249526893581
Nano 2	51.31752194983523
Nano 2	51.51037931503834
Nano 2	50.69406104232581
Nano 2	51.18149198635253
Nano 2	51.18773626412647
Nano 2	50.66047307139137
Nano 2	50.10769488801582
Nano 2	51.437935412421425
Nano 2	51.529875994429986
Nano 2	51.25163860275234
Nano 2	51.58044993522788
Nano 2	50.84461182511267
Nano 2	50.53406368877617
Nano 2	50.548443419764446
Nano 2	50.12548212365993
Nano 2	50.98767314266683
Nano 2	50.79540493231194
Nano 2	51.00172798268498
Nano 2	50.92350263275546
Nano 2	51.52259962257133
Nano 2	51.01430588425122
Nano 2	51.01579981438498
Nano 2	50.574684961106904
Nano 2	50.38096089330444
Nano 2	51.74451076596959
Nano 2	50.98052807259387
Nano 2	51.598295338420535
Nano 2	50.7618190491815
Nano 2	50.89498276863369
Nano 2	51.02457877386653
Nano 2	51.5739676443653
Nano 2	50.4683831934941
Nano 2	50.83123778443748
Nano 2	50.730011029626894
Nano 2	50.598627273254074
Nano 2	50.54815640099223
Nano 2	50.60381739672207
Nano 2	51.433088616301816
Nano 2	51.70270728336807
Nano 2	51.38168655753423
Nano 2	50.82319941296634
Nano 2	51.16436242342082
Nano 2	50.207242890683666
Nano 2	50.24363584475108
Nano 2	50.776432041160604
Nano 2	51.7865099462645
Nano 2	50.62058664159508
Nano 2	50.65496907369934
Nano 2	50.358512024311395
Nano 2	51.25145072958486
Nano 2	50.26965239395209
Nano 2	51.10860017993661
Nano 2	51.309850054560904
Nano 2	50.73802693925157
Nano 2	50.34751831061457
Nano 2	50.889386458964275
Nano 2	50.72469398061696
Nano 2	51.32400162168814
Nano 2	50.571019034287865
Nano 2	50.84615407854628
Nano 2	50.32829855484433
Nano 2	50.76714789536951
Nano 2	50.25269848334988
Nano 2	51.0864987160268
Nano 2	51.287007531891966
Nano 2	50.85988749333278
Nano 2	50.31315293938421
Nano 2	50.22050641037576
Nano 2	50.83820874511886
Nano 2	51.743476505185264
Nano 2	50.81588213537728
Nano 2	50.703268693792
Nano 2	50.61539537705663
Nano 2	51.29986358468416
Nano 2	50.784498883749094
Nano 2	51.87841476124274
Nano 2	50.45500878703349
Nano 2	50.818998566415964
Nano 2	51.8492943026476
Nano 2	51.77952194568455
Nano 2	50.88559740455896
Nano 2	50.30329822923025
Nano 2	50.93383080354818
Nano 2	50.81948033584788
Nano 2	51.42800936816635
Nano 2	51.21324178578795
Nano 2	51.24095923354635
Nano 2	50.3827783079954
Nano 2	51.298276853494514
Nano 2	50.75423422862265
Nano 2	50.842407619782186
Nano 2	50.90776932007971
Nano 2	50.52681983032384
Nano 2	49.86837071148779
Nano 2	51.279593441706254
Nano 2	50.55438213182645
Nano 2	51.17634013029508
Nano 2	51.68578018804572
Nano 2	50.997120869262375
Nano 2	51.011608892307585
Nano 2	51.19554099384955
Nano 2	51.29161810535849
Nano 2	51.16843729376572
Nano 2	50.85761249593907
Nano 2	51.50287528682347
Nano 2	51.15830522054946
Nano 2	50.695698778628255
Nano 2	50.685630283557536
Nano 2	51.13146871176718
Nano 2	50.98533573788632
Nano 2	50.389118778057735
Nano 2	51.720070796783
Nano 2	50.617868650502
Nano 2	51.012791030355686
Nano 2	51.06524066664754
Nano 2	49.598590013719935
Nano 2	50.8268492733661
Nano 2	50.229839225006664
Nano 2	51.17851925695771
Nano 2	50.86658904825633
Nano 2	50.06818910865444
Nano 2	51.10432284197539
Nano 2	51.40824684096136
Nano 2	51.17289629715593
Nano 2	50.77374045918733
Nano 2	50.69237760080264
Nano 2	51.10653748414349
Nano 2	51.21690572190713
Nano 2	51.502923593966116
Nano 2	50.916582404305714
Nano 2	51.39683635266938
Nano 2	50.9967924505085
Nano 2	51.363173847339304
Nano 2	50.34157085552181
Nano 2	50.323105621009255
Nano 2	50.94384516989857
Nano 2	50.670691981054794
Nano 2	51.52766468372391
Nano 2	51.3969619216249
Nano 2	51.81581318480232
Nano 2	51.3827064896315
Nano 2	51.971511658670856
Nano 2	50.4293501055085
Nano 2	51.067318913558275
Nano 2	50.4715505655856
Nano 2	50.81770328879018
Nano 2	51.94966641549293
Nano 2	50.13532638818639
Nano 2	50.327656690058845
Nano 2	50.905051075167385
Nano 2	50.407468521779236
Nano 2	49.93887877977041
Nano 2	50.83418605470447
Nano 2	51.42019017509494
Nano 2	50.84490728409246
Nano 2	51.97161839473427
Nano 2	50.68504317674802
Nano 2	51.11615322656882
Nano 2	50.35971972978151
Nano 2	50.295317261807874
Nano 2	51.06361365375411
Nano 2	50.62763640540287
Nano 2	50.87200296599346
Nano 2	50.28086491865255
Nano 2	50.75439021902228
Nano 2	51.16240069594022
Nano 2	50.42758654119761
Nano 2	50.87454428870536
Nano 2	51.39501173653529
Nano 2	51.92375000979439
Nano 2	50.99412352442216
Nano 2	50.92639188581541
Nano 2	50.85815803353324
Nano 2	50.90860089390538
Nano 2	51.291819964059265
Nano 2	51.616217199372876
Nano 2	50.73160690631329
Nano 2	51.33690334153345
Nano 2	50.690619296256706
Nano 2	49.99881872300533
Nano 2	51.912517177080346
Nano 2	50.99534032247655
Nano 2	50.45471443079546
Nano 2	51.2601117179419
Nano 2	50.84512060674706
Nano 2	50.171869592938634
Nano 2	50.80309058230572
Nano 2	50.810429932644304
Nano 2	50.24273553256529
Nano 2	50.998376255080665
Nano 2	51.17163708147305
Nano 2	50.56642910975857
Nano 2	51.732348516309735
Nano 2	50.3631117605919
Nano 2	51.40301651672349
Nano 2	50.73702024917066
Nano 2	50.809164165716766
Nano 2	51.11118346078903
Nano 2	50.39857858244122
Nano 2	51.30842042457216
Nano 2	51.516945562552245
Nano 2	51.16058965301108
Nano 2	50.25172128316026
Nano 2	50.64410062238748
Nano 2	49.71048813415693
Nano 2	50.08356046453184
Nano 2	51.48036291457538
Nano 2	51.01245136191528
Nano 2	50.92281506563735
Nano 2	50.91508702168446
Nano 2	49.950964981397945
Nano 2	50.591168649155165
Nano 2	50.528808783010476
Nano 2	51.85032005608762
Nano 2	50.369573680055936
Nano 2	51.20724653352142
Nano 2	50.17062849550756
Nano 2	50.678132600196996
Nano 2	51.13084494777596
Nano 2	49.792537655939746
Nano 2	51.35301804824055
Nano 2	51.30305094704759
Nano 2	50.34211682360062
Nano 2	51.03437017579493
Nano 2	51.699092428733884
Nano 2	51.12445627893414
Nano 2	50.937459767844224
Nano 2	51.75028023320024
Nano 2	50.90943714678736
Nano 2	51.21406861685726
Nano 2	51.03260749211895
Nano 2	51.03989886939886
Nano 2	50.33421873442106
Nano 2	50.72085322843955
Nano 2	51.224758869749195
Nano 2	50.881342628672535
Nano 2	50.91101953453034
Nano 2	51.03764985230862
Nano 2	50.91566983110641
Nano 2	50.90103659206458
Nano 2	50.70124918890795
Nano 2	50.66056898522101
Nano 2	51.96506379064525
Nano 2	51.341124644212215
Nano 2	50.64382052000781
Nano 2	51.03163713702599
Nano 2	50.801349092342534
Nano 2	51.30951240761955
Nano 2	51.35854975978765
Nano 2	49.512376978018274
Nano 2	50.54655962452999
Nano 2	50.69618262546697
Nano 2	49.79716265975519
Nano 2	50.428947770673545
Nano 2	50.81252068214067
Nano 2	50.910847898657494
Nano 2	50.53777902955144
Nano 2	50.58159621860899
Nano 2	50.14541858316744
Nano 2	50.32609829903478
Nano 2	51.56764389830459
Nano 2	50.603763606369654
Nano 2	51.34546686532506
Nano 2	51.32200268963788
Nano 2	50.79604851019237
Nano 2	51.50746921584662
Nano 2	49.86657462157798
Nano 2	51.698624975590334
Nano 2	51.212151113104355
Nano 2	51.26052502521524
Nano 2	50.7663172778846
Nano 2	50.545582473759275
Nano 2	50.83784203828333
Nano 2	50.14732789102013
Nano 2	50.934938753005724
Nano 2	50.23043074330834
Nano 2	50.685166565722206
Nano 2	51.33567590857433
Nano 2	51.563998563399025
Nano 2	50.75993091948214
Nano 2	50.36064561252817
Nano 2	51.39168409774531
Nano 2	49.77978879372522
Nano 2	50.93007343109483
Nano 2	50.73120586142409
Nano 2	51.12294341082292
Nano 2	51.07924258342875
Nano 2	50.764994586597425
Nano 2	51.3665531256001
Nano 2	50.8150293535581
Nano 2	50.67534724479123
Nano 2	50.57877419118579
Nano 2	50.483231372087516
Nano 2	50.263405428752485
Nano 2	50.73992787924066
Nano 2	51.02607738277328
Nano 2	50.579577543859415
Nano 2	50.48608479317061
Nano 2	50.402955048546744
Nano 2	51.34419622483621
Nano 2	50.5022343857757
Nano 2	50.9559709405059
Nano 2	51.66719946555758
Nano 2	50.815381305261674
Nano 2	51.76461083088547
Nano 2	51.30951774829708
Nano 2	50.939503353926774
Nano 2	51.617894019247835
Nano 2	52.72829478740822
Nano 2	50.83549708598135
Nano 2	51.22767735234763
Nano 2	51.485361870937474
Nano 2	50.4519177647903
Nano 2	51.83307614915017
Nano 2	50.63018082089808
Nano 2	51.76020062010434
Nano 2	51.26213576976057
Nano 2	52.0605277315957
Nano 2	50.496300255511684
Nano 2	51.656386188734466
Nano 2	51.368635096180014
Nano 2	51.769572742832736
Nano 2	51.57237723180925
Nano 2	51.38252840713587
Nano 2	51.70162363511202
Nano 2	50.38150227468521
Nano 2	52.07107280288607
Nano 2	51.69236367401148
Nano 2	50.040436564081894
Nano 2	50.9114616530312
Nano 2	50.830092641595506
Nano 2	51.495260786379376
Nano 2	50.61417305114338
Nano 2	51.29460083463642
Nano 2	50.61495346335841
Nano 2	51.073067260561
Nano 2	51.50359907426012
Nano 2	50.998393769128995
Nano 2	50.71840534686809
Nano 2	51.41007395854928
Nano 2	50.8684572099871
Nano 2	51.14736000364029
Nano 2	50.11893150777435
Nano 2	50.94106158777966
Nano 2	50.74425183391179
Nano 2	51.42151058555478
Nano 2	51.36415510486942
Nano 2	50.7486148699352
Nano 2	49.51081586630833
Nano 2	50.815668587264824
Nano 2	50.25156383159053
Nano 2	51.30756420143934
Nano 2	50.944908346404084
Nano 2	50.39939207625783
Nano 2	50.28882684365474
Nano 2	50.47907163180455
Nano 2	50.845640441291316
Nano 2	50.91759702229751
Nano 2	51.31452893579017
Nano 2	50.21816934608179
Nano 2	51.16279765911795
Nano 2	50.22404523118036
Nano 2	51.50986745187596
Nano 2	50.16192039735181
Nano 2	51.167306975265085
Nano 2	50.52764870291295
Nano 2	51.256392983833805
Nano 2	51.13307228087095
Nano 2	51.22817987562964
Nano 2	51.35917386778518
Nano 2	49.943461088037495
Nano 2	51.27063588684206
Nano 2	49.99563082765776
Nano 2	51.92271968455625
Nano 2	50.27899217299061
Nano 2	50.91339752333991
Nano 2	51.55774059714252
Nano 2	50.93931687536239
Nano 2	51.64379768445701
Nano 2	51.22586470203452
Nano 2	51.476123606896294
Nano 2	51.008037404533475
Nano 2	51.886205748186356
Nano 2	50.2766901887184
Nano 2	50.1725429633688
Nano 2	51.08785901764463
Nano 2	50.48591886211654
Nano 2	51.41786023854398
Nano 2	50.9335717760018
Nano 2	50.453744933347224
Nano 2	50.73527864735168
Nano 2	51.86026393056202
Nano 2	49.874457347469296
Nano 2	50.69814006060018
Nano 2	50.71639162019974
Nano 2	50.99928675888824
Nano 2	51.283798170856116
Nano 2	52.01970457758974
Nano 2	49.542294063619345
Nano 2	51.42929219140877
Nano 2	51.38768243305732
Nano 2	51.242439290356224
Nano 2	50.81084630450717
Nano 2	50.26996565822058
Nano 2	51.16960922054695
Nano 2	50.71592102547712
Nano 2	50.30895774959229
Nano 2	51.04272986718375
Nano 2	50.617937879748204
Nano 2	52.503563761617905
Nano 2	50.5435488151206
Nano 2	51.212557583282155
Nano 2	50.96891425355695
Nano 2	51.27921399577578
Nano 2	51.14265385163264
Nano 2	51.5915929486295
Nano 2	50.96854243407873
Nano 2	51.03904441859312
Nano 2	51.08799670219508
Nano 2	51.24105760354111
Nano 2	51.28948488537585
Nano 2	50.78776569364429
Nano 2	50.679890675844725
Nano 2	51.239461000484525
Nano 2	50.66858285228405
Nano 2	51.558607904162585
Nano 2	50.64380617547714
Nano 2	50.578601708716356
Nano 2	50.545024449298666
Nano 2	50.09414445777655
Nano 2	51.80620310013103
Nano 2	50.7846763695614
Nano 2	50.1774644175942
Nano 2	50.96594430462569
Nano 2	50.986789699832904
Nano 2	50.4182673182615
Nano 2	50.630716855667764
Nano 2	50.93328675264012
Nano 2	50.53282673047616
Nano 2	49.97391472971598
Nano 2	50.54674847809854
Nano 2	51.59986914084357
Nano 2	50.459866357952755
Nano 2	50.72949256294031
Nano 2	50.40855622898813
Nano 2	50.74947938852724
Nano 2	51.22997129938887
Nano 2	50.67992058475639
Nano 2	50.26750512670851
Nano 2	51.53120233604954
Nano 2	50.57924706622691
Nano 2	51.480342001774765
Nano 2	51.77838807748377
Nano 2	51.17939115351531
Nano 2	50.94074599246807
Nano 2	51.399004086100724
Nano 2	50.07675021609276
Nano 2	50.88733656245513
Nano 2	51.07994621053369
Nano 2	51.48663496569305
Nano 2	49.370056043403174
Nano 2	51.45037548528682
Nano 2	50.179202799382345
Nano 2	50.33542536963992
Nano 2	51.008781360323404
Nano 2	50.51640707037861
Nano 2	50.58743658915787
Nano 2	50.80085843214286
Nano 2	51.19044519395917
Nano 2	50.78411793548538
Nano 2	51.79086511672614
Nano 2	51.12585913506457
Nano 2	50.46753360615796
Nano 2	51.04742303221535
Nano 2	51.15444844103111
Nano 2	50.69046983588051
Nano 2	50.07416996203015
Nano 2	49.970553185669566
Nano 2	50.63324507408426
Nano 2	51.10430949799674
Nano 2	52.21644046587027
Nano 2	50.118051867738686
Nano 2	52.09893531033449
Nano 2	52.04520604663786
Nano 2	50.85728287568214
Nano 2	50.922967132967614
Nano 2	50.630511191887905
Nano 2	51.07870559472075
Nano 2	50.98820190213631
Nano 2	50.02767063053575
Nano 2	50.617984528548355
Nano 2	51.25134917429767
Nano 2	50.547262827315194
Nano 2	50.32395724176609
Nano 2	51.37224862984632
Nano 2	51.4936046385215
Nano 2	51.08260269250576
Nano 2	50.23179005684726
Nano 2	49.821538476782834
Nano 2	51.20280680311707
Nano 2	51.93312161386107
Nano 2	51.099633703252024
Nano 2	50.51678670642475
Nano 2	50.37275293122376
Nano 2	51.624537609037034
Nano 2	51.56652160958658
Nano 2	50.48693664751325
Nano 2	50.83876600450901
Nano 2	50.64128094445044
Nano 2	50.73873254363717
Nano 2	50.717664899385355
Nano 2	51.33303429361272
Nano 2	51.83575776657338
Nano 2	51.77909948103948
Nano 2	51.44628665217053
Nano 2	50.02282985927838
Nano 2	49.940408302998904
Nano 2	50.9023635746514
Nano 2	52.34352441932294
Nano 2	51.28467836330058
Nano 2	50.467049153357806
Nano 2	50.282403614011464
Nano 2	51.89591654089084
Nano 2	51.61911276627693
Nano 2	50.505825622930594
Nano 2	50.384715550741504
Nano 2	51.4029019625513
Nano 2	50.486497486160474
Nano 2	51.381154397422996
Nano 2	50.88007025200145
Nano 2	51.19747718058058
Nano 2	50.519938642062925
Nano 2	51.24315113726937
Nano 2	50.74975388707203
Nano 2	51.33821668688276
Nano 2	50.76631104919736
Nano 2	51.71943799918461
Nano 2	51.34570335557027
Nano 2	51.04647303745235
Nano 2	51.352892661297616
Nano 2	50.688363107546074
Nano 2	51.39037403117439
Nano 2	49.872313353764525
Nano 2	51.27701660549703
Nano 2	50.414637166756165
Nano 2	50.56626288143706
Nano 2	50.4463250425909
Nano 2	51.93204164414767
Nano 2	50.58000312759679
Nano 2	50.510677301428274
Nano 2	50.87119809060322
Nano 2	50.629205157382
Nano 2	51.20227975406389
Nano 2	51.86974991678133
Nano 2	50.80482271873141
Nano 2	51.28342564971695
Nano 2	51.16740352704542
Nano 2	50.54304474096432
Nano 2	51.406678692212935
Nano 2	52.1186261449086
Nano 2	50.189850093971856
Nano 2	50.73426925014056
Nano 2	51.20698531563553
Nano 2	50.69364954988783
Nano 2	51.139476497444846
Nano 2	51.34934305197752
Nano 2	50.58643297530947
Nano 2	50.04249728341745
Nano 2	51.2914847497973
Nano 2	50.93786854448075
Nano 2	52.121562569448244
Nano 2	51.03561180282508
Nano 2	50.34224506044457
Nano 2	50.95609398385284
Nano 2	51.04075953418371
Nano 2	49.831833304919385
Nano 2	50.668323043554075
Nano 2	51.22011084791319
Nano 2	51.333608135655744
Nano 2	50.562545077551825
Nano 2	52.09759377027585
Nano 2	50.97324931191433
Nano 2	50.72782521414295
Nano 2	50.4956471704784
Nano 2	50.79685304596241
Nano 2	50.68197531615831
Nano 2	50.98915521746455
Nano 2	50.260266998550364
Nano 2	50.692917455340904
Nano 2	50.96955826426923
Nano 2	50.195770809751515
Nano 2	50.70419052688514
Nano 2	50.89108588185524
Nano 2	50.441040335896915
Nano 2	50.527866314312824
Nano 2	50.37000695312552
Nano 2	50.70916300164142
Nano 2	50.61958993676799
Nano 2	51.14759980332062
Nano 2	50.717541715761946
Nano 2	50.52037849241604
Nano 2	50.782542186474856
Nano 2	51.191109392371
Nano 2	50.35959695430566
Nano 2	51.56035491808643
Nano 2	51.668665022281154
Nano 2	51.298499190691665
Nano 2	50.222866667903396
Nano 2	50.612934176827885
Nano 2	50.717224536587175
Nano 2	50.685007908374835
Nano 2	50.62812017369311
Nano 2	50.93924975300168
Nano 2	50.9295865148025
Nano 2	51.64418221328934
Nano 2	51.03348011343893
Nano 2	50.95342672414958
Nano 2	50.83592566490156
Nano 2	50.28762742153562
Nano 2	50.826598857393144
Nano 2	51.65086003471679
Nano 2	50.9814844142139
Nano 2	52.082022044114275
Nano 2	51.81013963272605
Nano 2	50.98662908346343
Nano 2	50.42348952460726
Nano 2	51.16014690579111
Nano 2	50.91536768759893
Nano 2	51.85716971736359
Nano 2	51.902234516954024
Nano 2	50.74335467778603
Nano 2	51.94661214810465
Nano 30	90.8531110037801
Nano 30	90.88532985859885
Nano 30	90.81576897216824
Nano 30	90.46028774322903
Nano 30	90.48567040855525
Nano 30	90.30356555722966
Nano 30	91.07148154619104
Nano 30	90.68876300186967
Nano 30	90.33006710117499
Nano 30	90.58303636542433
Nano 30	90.88125382627442
Nano 30	90.68867919793809
Nano 30	90.50498819207336
Nano 30	90.9358421296764
Nano 30	90.40306956630884
Nano 30	90.74786244818678
Nano 30	91.03016316515813
Nano 30	90.4447181903856
Nano 30	90.67742584094151
Nano 30	90.58699113490722
Nano 30	91.21870001428424
Nano 30	91.32013033278939
Nano 30	90.838803758838
Nano 30	90.47347259236777
Nano 30	90.71467932737774
Nano 30	90.31990469954226
Nano 30	91.08216645148494
Nano 30	90.92504174929837
Nano 30	90.69704807851633
Nano 30	90.65102237030752
Nano 30	90.79305080728341
Nano 30	90.61358077687188
Nano 30	90.77489758478313
Nano 30	90.81911202433717
Nano 30	90.83401731562378
Nano 30	90.78759495050919
Nano 30	90.89924583452233
Nano 30	91.2435998833757
Nano 30	91.0733469246573
Nano 30	91.00047028880319
Nano 30	90.92161029214178
Nano 30	90.63410779303287
Nano 30	90.70250082940402
Nano 30	90.81461407370753
Nano 30	90.74544293237057
Nano 30	90.97184879769001
Nano 30	91.13977777103956
Nano 30	90.53008093902983
Nano 30	90.51138095360896
Nano 30	90.99819264171482
Nano 30	90.75176762085752
Nano 30	91.1377360965302
Nano 30	90.71621150089916
Nano 30	91.1532975137087
Nano 30	90.81852909914366
Nano 30	90.76149545338485
Nano 30	91.09672026752027
Nano 30	90.67322942559416
Nano 30	90.80798849293133
Nano 30	90.39773727414403
Nano 30	90.79067800954626
Nano 30	90.78882289913321
Nano 30	90.99430191337343
Nano 30	90.80663971812804
Nano 30	90.74097912060664
Nano 30	90.91797673995907
Nano 30	90.46238871901558
Nano 30	90.37019590135588
Nano 30	90.43917254679027
Nano 30	91.03087801711101
Nano 30	90.69786398562809
Nano 30	90.73031636158855
Nano 30	91.19864859694627
Nano 30	90.28942319406298
Nano 30	90.4884233646081
Nano 30	90.66183309464762
Nano 30	91.05237483034102
Nano 30	90.4866203229796
Nano 30	90.54068269387945
Nano 30	90.96993987466637
Nano 30	90.94113143044173
Nano 30	90.79772867503004
Nano 30	90.76394522842135
Nano 30	91.08575645567275
Nano 30	90.78621853044098
Nano 30	90.94881504584184
Nano 30	91.10167483862134
Nano 30	91.35409772107464
Nano 30	90.4400811563135
Nano 30	90.8292513190967
Nano 30	90.85955629087965
Nano 30	90.86161204644276
Nano 30	91.09769280006856
Nano 30	90.65842613342409
Nano 30	90.55469016189038
Nano 30	90.56890319848516
Nano 30	90.53736074121528
Nano 30	90.47329363978109
Nano 30	90.65812083467699
Nano 30	90.63486404601892
Nano 30	90.68854588019285
Nano 30	90.80309956191786
Nano 30	91.04197985344285
Nano 30	90.6605700567027
Nano 30	91.03176870720611
Nano 30	90.51788921260047
Nano 30	90.73762493574951
Nano 30	91.10634190278714
Nano 30	90.65468638757883
Nano 30	90.51335518164873
Nano 30	90.45387903779799
Nano 30	90.72179755126777
Nano 30	90.32419493282218
Nano 30	90.41906059997454
Nano 30	90.87797487318149
Nano 30	90.47843386023682
Nano 30	90.56739387901497
Nano 30	90.8404098568548
Nano 30	90.16824758627956
Nano 30	90.77068926529084
Nano 30	90.78680201725447
Nano 30	90.63530748193513
Nano 30	89.94328073694236
Nano 30	90.4624934516443
Nano 30	90.73477702834403
Nano 30	90.2813572811183
Nano 30	90.92605146934515
Nano 30	90.8946074512103
Nano 30	90.43038986001967
Nano 30	91.03864493170174
Nano 30	90.6762262508471
Nano 30	90.35937769127617
Nano 30	90.39831534329343
Nano 30	90.70996891705866
Nano 30	90.70740089186693
Nano 30	90.74309205619812
Nano 30	90.31822886757874
Nano 30	90.66600518564184
Nano 30	91.09296411129262
Nano 30	90.64506303116738
Nano 30	91.01736135542662
Nano 30	90.42045189456394
Nano 30	90.60658378825059
Nano 30	91.04029006408147
Nano 30	90.73768939355243
Nano 30	90.78551798001088
Nano 30	91.13942949888383
Nano 30	91.11615555706486
Nano 30	91.05175818619122
Nano 30	90.76875727403089
Nano 30	90.90391275961233
Nano 30	90.91627239046257
Nano 30	91.03144050688559
Nano 30	90.7308296401119
Nano 30	90.82973637980199
Nano 30	90.34677991785279
Nano 30	90.53296935274822
Nano 30	90.36740399830055
Nano 30	90.67525490754872
Nano 30	90.87744613490545
Nano 30	90.96457412310451
Nano 30	90.7862955976481
Nano 30	90.47741968560689
Nano 30	90.95165779036118
Nano 30	90.31566769580019
Nano 30	91.03328315298579
Nano 30	90.8083480190759
Nano 30	91.10899747814429
Nano 30	91.01551829687732
Nano 30	90.22673857681879
Nano 30	90.40460753667057
Nano 30	90.54332837238374
Nano 30	91.0424976953666
Nano 30	90.77374035269386
Nano 30	90.57306997048359
Nano 30	90.56722424821876
Nano 30	90.4716114507331
Nano 30	90.38670544847008
Nano 30	91.21747578373572
Nano 30	90.96248918261344
Nano 30	91.21444710787756
Nano 30	90.89814514583108
Nano 30	90.97069345075505
Nano 30	90.16396513540667
Nano 30	90.81833874472602
Nano 30	90.92667235101706
Nano 30	90.58364594294257
Nano 30	90.95480805296798
Nano 30	91.07716704383128
Nano 30	90.76659453123916
Nano 30	90.59114317877497
Nano 30	90.9288694955516
Nano 30	90.21615063428905
Nano 30	90.74032309412006
Nano 30	91.06422053251693
Nano 30	90.95667973992225
Nano 30	90.73536751917615
Nano 30	90.68870945101301
Nano 30	90.69839357817155
Nano 30	90.88912495191553
Nano 30	90.56282330466478
Nano 30	90.56540369553348
Nano 30	90.76507077553129
Nano 30	90.2281496636681
Nano 30	90.25662500920811
Nano 30	91.04222995413403
Nano 30	90.43428048436557
Nano 30	91.1264525204935
Nano 30	91.14185794521465
Nano 30	90.67674323450493
Nano 30	91.1143664913215
Nano 30	90.77012444097346
Nano 30	91.0988371681405
Nano 30	90.83051930148034
Nano 30	90.8285459246001
Nano 30	90.8053588125547
Nano 30	91.02548764118575
Nano 30	90.54055585896597
Nano 30	90.50796960174473
Nano 30	90.36492011078074
Nano 30	90.58782155875771
Nano 30	90.62262483263368
Nano 30	91.11858215366318
Nano 30	90.69367336561648
Nano 30	90.80618080093546
Nano 30	91.04830309739447
Nano 30	91.09962807484791
Nano 30	90.68755189200142
Nano 30	90.48100688013172
Nano 30	91.2076466341974
Nano 30	90.92389469346871
Nano 30	90.54903288605439
Nano 30	90.76288692714695
Nano 30	90.10452679259888
Nano 30	91.00940574353739
Nano 30	90.46879014366469
Nano 30	90.57214596783979
Nano 30	91.08521079291489
Nano 30	90.53562539364286
Nano 30	90.41178538106254
Nano 30	90.47441438177985
Nano 30	90.88102869880575
Nano 30	90.39211920451245
Nano 30	90.78968525450819
Nano 30	90.99877803536096
Nano 30	90.82030158735331
Nano 30	90.44579530130885
Nano 30	90.80793050454795
Nano 30	90.19778092958495
Nano 30	90.75416393973993
Nano 30	90.98470621906543
Nano 30	90.83552775277792
Nano 30	91.37621519301406
Nano 30	90.69652135706119
Nano 30	90.96515693728838
Nano 30	90.55444779483138
Nano 30	90.52030413325978
Nano 30	90.60292606917929
Nano 30	90.60658929519788
Nano 30	90.52847001037357
Nano 30	90.43259737673479
Nano 30	90.85751360129527
Nano 30	90.73664565943419
Nano 30	90.87049840746272
Nano 30	90.65011848120412
Nano 30	90.56271539488488
Nano 30	90.68935220799838
Nano 30	90.28598642466787
Nano 30	90.57726436706847
Nano 30	90.7665726916425
Nano 30	90.84178304806105
Nano 30	90.53046392818185
Nano 30	90.75674086570795
Nano 30	90.34055704451433
Nano 30	91.00849806348198
Nano 30	90.71259982598505
Nano 30	90.76094915663376
Nano 30	90.90738182991903
Nano 30	91.03362526186373
Nano 30	90.41711877899972
Nano 30	90.6168936789265
Nano 30	90.52419866167311
Nano 30	90.89272472510822
Nano 30	90.9396479721169
Nano 30	91.3293699282
Nano 30	90.3209073300143
Nano 30	90.53742457269097
Nano 30	90.43979502264612
Nano 30	91.20220605218327
Nano 30	90.34729398358206
Nano 30	90.92969283883421
Nano 30	90.68001445612913
Nano 30	90.76938931337962
Nano 30	90.78263612679106
Nano 30	91.16875205641234
Nano 30	91.10384920150149
Nano 30	90.92364030614695
Nano 30	91.40257114091474
Nano 30	91.28112762792009
Nano 30	90.40112954179773
Nano 30	90.83099250057563
Nano 30	90.3541950807784
Nano 30	90.67296091903634
Nano 30	90.62934376834112
Nano 30	90.1608808952003
Nano 30	90.47765600566132
Nano 30	90.98372096142133
Nano 30	90.60390490970111
Nano 30	90.5863436553648
Nano 30	90.86073501035474
Nano 30	90.84086273669931
Nano 30	90.34994234824183
Nano 30	90.63113826391613
Nano 30	90.75203658673307
Nano 30	90.37829933897271
Nano 30	91.06893305714868
Nano 30	91.17640950680482
Nano 30	90.43711613223255
Nano 30	90.82797741361097
Nano 30	90.83627175891323
Nano 30	90.6385111226589
Nano 30	90.81480070738296
Nano 30	90.20772795040466
Nano 30	90.73440106841355
Nano 30	90.63664007182292
Nano 30	90.79117892685906
Nano 30	90.38542522896627
Nano 30	90.3391208809537
Nano 30	90.63038253577132
Nano 30	90.54541997587295
Nano 30	90.50786130854407
Nano 30	90.46961483613701
Nano 30	90.85844315824211
Nano 30	90.79971355200742
Nano 30	91.18748465418508
Nano 30	90.81193733573095
Nano 30	90.37675567105995
Nano 30	90.84710833387274
Nano 30	90.37564148023797
Nano 30	90.81138508665771
Nano 30	90.63247580106841
Nano 30	90.61196965780024
Nano 30	90.98406123436878
Nano 30	90.47995669789647
Nano 30	90.51519870995185
Nano 30	90.92233627957724
Nano 30	90.84028345869731
Nano 30	90.25476717976358
Nano 30	90.82394019768265
Nano 30	91.51059763384096
Nano 30	91.14404379832274
Nano 30	90.92911116563941
Nano 30	90.32318784779864
Nano 30	90.6762784454936
Nano 30	90.78107222705744
Nano 30	91.03802639400348
Nano 30	91.2098825709306
Nano 30	91.35974540058666
Nano 30	90.57360744092506
Nano 30	90.69317940692791
Nano 30	90.53040459226591
Nano 30	90.51610359669144
Nano 30	90.21214801391919
Nano 30	90.23925360573331
Nano 30	90.71292009497861
Nano 30	90.36976663649916
Nano 30	90.78896464148124
Nano 30	90.58399830780841
Nano 30	90.67181884940521
Nano 30	90.61338080896087
Nano 30	91.24272508401383
Nano 30	90.32778674392166
Nano 30	90.88834508463546
Nano 30	90.656823200192
Nano 30	90.6564725940118
Nano 30	91.32147025185029
Nano 30	90.75905709392647
Nano 30	90.8353422482734
Nano 30	90.61834571393084
Nano 30	90.72138324188346
Nano 30	90.38058336939791
Nano 30	90.75992391740895
Nano 30	90.39171275878519
Nano 30	90.5317607200806
Nano 30	90.84934142036767
Nano 30	90.96357201911715
Nano 30	90.49742338469818
Nano 30	90.23509688937287
Nano 30	91.15585664041828
Nano 30	90.95516423595654
Nano 30	90.65333626820895
Nano 30	90.68768254655623
Nano 30	90.90302453097058
Nano 30	90.19405799411892
Nano 30	90.93425450069162
Nano 30	90.65309820106604
Nano 30	90.95985987310202
Nano 30	90.33496413485844
Nano 30	91.08294875791263
Nano 30	91.15419815424532
Nano 30	90.92321952448215
Nano 30	90.39551752855286
Nano 30	90.89335476965846
Nano 30	91.32517900281674
Nano 30	90.68368357838192
Nano 30	90.57265304556485
Nano 30	90.6180648002762
Nano 30	90.78709849549197
Nano 30	91.00434232718311
Nano 30	90.89011894552542
Nano 30	90.46756896737288
Nano 30	90.87162072552272
Nano 30	91.42705012386618
Nano 30	91.0506539232699
Nano 30	90.62008859712687
Nano 30	90.91409848955168
Nano 30	90.58651498262263
Nano 30	90.98412589816037
Nano 30	91.21524568614923
Nano 30	91.04050333149934
Nano 30	90.56857270221136
Nano 30	91.01763032974111
Nano 30	90.83298375395123
Nano 30	90.88565160278947
Nano 30	90.51719268188415
Nano 30	90.89923140397865
Nano 30	90.59623487945571
Nano 30	90.47878793843569
Nano 30	90.66104650247087
Nano 30	91.096121647861
Nano 30	90.65177465780536
Nano 30	90.70404713348373
Nano 30	90.623258378613
Nano 30	90.91844037082335
Nano 30	90.39652773421388
Nano 30	91.22524652118459
Nano 30	90.7297853269427
Nano 30	91.2924254973256
Nano 30	90.71183739482966
Nano 30	91.1642922609391
Nano 30	90.40363444137783
Nano 30	91.03191679437597
Nano 30	90.98307942385816
Nano 30	90.64766923039511
Nano 30	91.19871310193126
Nano 30	90.62637886656346
Nano 30	90.30929524662551
Nano 30	90.29275789556495
Nano 30	90.1899872985378
Nano 30	91.10523323656193
Nano 30	91.08344099440195
Nano 30	91.43616705050182
Nano 30	90.48450704172174
Nano 30	90.89575816021105
Nano 30	90.98823146343689
Nano 30	90.84836740161167
Nano 30	90.3498313089311
Nano 30	91.00202864317383
Nano 30	90.54247470588216
Nano 30	90.50127331557891
Nano 30	90.64652161212443
Nano 30	90.95982211679127
Nano 30	91.39168090374702
Nano 30	90.53201835944213
Nano 30	91.00546800074369
Nano 30	90.62717309076497
Nano 30	90.64367530726328
Nano 30	90.9742169121097
Nano 30	91.01363558824688
Nano 30	91.36285541186355
Nano 30	90.87360387169909
Nano 30	90.34648628433338
Nano 30	91.22013351269155
Nano 30	90.7268271098776
Nano 30	90.8748937775794
Nano 30	90.72060083562877
Nano 30	90.87786096577051
Nano 30	90.69553722681925
Nano 30	90.36179782975714
Nano 30	90.79424062049829
Nano 30	90.6263311058125
Nano 30	90.93329320110193
Nano 30	90.38505742958166
Nano 30	89.98764355645154
Nano 30	90.78382186338337
Nano 30	90.75894833435369
Nano 30	90.6163848519783
Nano 30	90.64977475717173
Nano 30	90.72934508505023
Nano 30	90.34748905874687
Nano 30	90.63209036190344
Nano 30	90.7691676304672
Nano 30	90.63962088380342
Nano 30	91.00311019248751
Nano 30	90.31381186966382
Nano 30	90.1786620375687
Nano 30	90.44301268120388
Nano 30	91.23980310654356
Nano 30	90.52299396360958
Nano 30	91.1624618360853
Nano 30	90.86946363951449
Nano 30	90.67161928719982
Nano 30	90.81304854198542
Nano 30	90.87812239222582
Nano 30	90.51473385374608
Nano 30	90.64530880490055
Nano 30	91.0392342037789
Nano 30	90.28126558580215
Nano 30	90.85671634560552
Nano 30	90.86073391105573
Nano 30	90.77293119617285
Nano 30	91.14083585183559
Nano 30	90.53358183929626
Nano 30	90.84649373897162
Nano 30	90.24165607284975
Nano 30	90.93599641889645
Nano 30	90.70167768183187
Nano 30	90.09936125920842
Nano 30	90.75721070146903
Nano 30	91.10779164334252
Nano 30	90.83371107740895
Nano 30	91.17613996651534
Nano 30	90.97698246250428
Nano 30	90.82143979407373
Nano 30	90.46615772123955
Nano 30	90.82777118674218
Nano 30	90.80636685922379
Nano 30	90.54283379221995
Nano 30	90.56162337043877
Nano 30	91.02576379095945
Nano 30	90.11352636664898
Nano 30	90.63328301070948
Nano 30	90.5431888064219
Nano 30	90.94148791771687
Nano 30	90.56398408027567
Nano 30	90.56663420366608
Nano 30	90.98878317754833
Nano 30	90.54824913547255
Nano 30	90.86983344073629
Nano 30	90.58802790351352
Nano 30	90.81957258821917
Nano 30	91.05198771169619
Nano 30	90.2532048613017
Nano 30	90.8990263217052
Nano 30	91.03720543810945
Nano 30	91.19068345319072
Nano 30	90.85876689566096
Nano 30	91.0095536389001
Nano 30	90.98682638869506
Nano 30	90.91371100032364
Nano 30	91.10385065604088
Nano 30	90.73061316060607
Nano 30	90.39430839923051
Nano 30	90.94689634963005
Nano 30	90.97939086566878
Nano 30	90.60022753793636
Nano 30	90.89283095248912
Nano 30	90.5442126891481
Nano 30	90.87266445644889
Nano 30	91.31499058665902
Nano 30	90.60334513422362
Nano 30	90.36176214082515
Nano 30	90.59698257260473
Nano 30	90.72463685095374
Nano 30	90.40839618184069
Nano 30	90.61881287379198
Nano 30	90.3400250217981
Nano 30	91.26273595106564
Nano 30	90.98303012866695
Nano 30	90.72250519926564
Nano 30	90.91170729544383
Nano 30	90.29660769609339
Nano 30	91.02373311404037
Nano 30	90.89540819033837
Nano 30	90.65563856370402
Nano 30	90.46506675073329
Nano 30	90.64578112666652
Nano 30	90.72724704751691
Nano 30	90.78186517469655
Nano 30	91.00343115556447
Nano 30	90.67373619682859
Nano 30	90.51484796307084
Nano 30	91.10345388707609
Nano 30	90.82926139874957
Nano 30	90.81143507664154
Nano 30	91.04176806107915
Nano 30	90.79255519354373
Nano 30	90.74739258336407
Nano 30	89.95744989219702
Nano 30	90.5210973335005
Nano 30	90.71772906904545
Nano 30	90.74635699493746
Nano 30	90.73300971290358
Nano 30	90.45433818154729
Nano 30	91.02265645984158
Nano 30	90.67970749859082
Nano 30	90.87382676695192
Nano 30	91.20072654081383
Nano 30	90.95737954009486
Nano 30	91.20470531816096
Nano 30	90.67089920668386
Nano 30	91.3230373421945
Nano 30	90.45108249650873
Nano 30	90.8003964963861
Nano 30	90.31110180191183
Nano 30	90.3884970327328
Nano 30	90.82116494648409
Nano 30	90.28825442997717
Nano 30	91.02330957630528
Nano 30	90.959510871515
Nano 30	90.66474963190662
Nano 30	90.58917779242698
Nano 30	90.22133412322687
Nano 30	90.97221639918183
Nano 30	90.85567411753628
Nano 30	90.6159677394389
Nano 30	90.49504927526728
Nano 30	90.94069412991313
Nano 30	90.64443297560986
Nano 30	90.29141256633304
Nano 30	90.15928323216329
Nano 30	90.75398063192392
Nano 30	90.91910278207126
Nano 30	91.42103780675379
Nano 30	90.38626627011597
Nano 30	91.06268726551515
Nano 30	90.93912143791563
Nano 30	90.8886937187375
Nano 30	90.4046588379461
Nano 30	91.00746865192724
Nano 30	90.76721501799474
Nano 30	90.6095408862922
Nano 30	90.54830131261993
Nano 30	90.91048519253685
Nano 30	90.90421719586763
Nano 30	90.32574848979493
Nano 30	90.5270520952696
Nano 30	90.87698040084187
Nano 30	90.67450642919648
Nano 30	90.67650735635658
Nano 30	90.63611840507613
Nano 30	90.47614960708123
Nano 30	90.61248558089106
Nano 30	90.79841570419205
Nano 30	91.25045574611173
Nano 30	90.79414463714085
Nano 30	90.66320293937154
Nano 30	90.39101158680441
Nano 30	90.68485687766164
Nano 30	91.18623920293413
Nano 30	90.90336909591082
Nano 30	90.86849853454586
Nano 30	90.76214907039952
Nano 30	90.87645807963048
Nano 30	90.72840945793897
Nano 30	90.64788570174915
Nano 30	90.94362725484126
Nano 30	90.67958296785075
Nano 30	90.79458029498431
Nano 30	90.6741006825508
Nano 30	90.8094358489614
Nano 30	90.60688534022061
Nano 30	90.64308628918808
Nano 30	90.48556628563499
Nano 30	90.93598826874997
Nano 30	90.35570027148148
Nano 30	91.05891663671817
Nano 30	90.76415218234803
Nano 30	90.88484452876862
Nano 30	91.46314335415438
Nano 30	91.17119030458184
Nano 30	90.83950482814062
Nano 30	91.19928608316485
Nano 30	90.70659557273258
Nano 30	90.79141416133292
Nano 30	91.01914248346583
Nano 30	90.54501749195519
Nano 30	90.72194303526472
Nano 30	90.87566820867151
Nano 30	90.60885359991892
Nano 30	90.39917421367169
Nano 30	91.1883519785632
Nano 30	90.82629944404196
Nano 30	90.96370111474022
Nano 30	90.10685284959212
Nano 30	90.79369707390155
Nano 30	90.81602187244451
Nano 30	90.89109598619258
Nano 30	90.17980871183637
Nano 30	90.22465677386454
Nano 30	90.69570926067148
Nano 30	90.69526931753406
Nano 30	90.44025283282049
Nano 30	91.22560744013967
Nano 30	90.4104462237343
Nano 30	89.99008339746285
Nano 30	90.87345523043162
Nano 30	90.55927744837746
Nano 30	90.02931486770372
Nano 30	90.49815413390867
Nano 30	90.66065206739907
Nano 30	90.46356033218373
Nano 30	90.97309406441457
Nano 30	90.26895612783946
Nano 30	90.84520237642553
Nano 30	91.24142906947478
Nano 30	90.88541461705151
Nano 30	90.9922335698004
Nano 30	91.15932904454266
Nano 30	90.6213135205514
Nano 30	90.86441820397688
Nano 30	90.92129909821803
Nano 30	90.48871400913548
Nano 30	90.6270152624192
Nano 30	90.92886330819942
Nano 30	90.4342361114189
Nano 30	91.12437451144675
Nano 30	90.3996229886198
Nano 30	90.90109204814746
Nano 30	91.01416486630642
Nano 30	90.91047846921535
Nano 30	90.44977047824054
Nano 30	90.76320750048342
Nano 30	90.40259556548216
Nano 30	90.58308487744539
Nano 30	90.87202752931394
Nano 30	91.00790571805891
Nano 30	91.11415228229676
Nano 30	90.90853204977357
Nano 30	91.03270183095933
Nano 30	90.75014156964227
Nano 30	90.48804446038632
Nano 30	90.47931087307201
Nano 30	90.40549534139761
Nano 30	90.86471401805541
Nano 30	91.09336459087287
Nano 30	90.96068582501846
Nano 30	90.69114495484654
Nano 30	90.98645592739634
Nano 30	90.8869145544344
Nano 30	90.19455675766156
Nano 30	90.86908796299504
Nano 30	91.0833690973994
Nano 30	91.08467529630205
Nano 30	90.57293936395112
Nano 30	90.57297436226091
Nano 30	90.65034059604875
Nano 30	90.42033418530673
Nano 30	90.61872501392162
Nano 30	90.67060388058697
Nano 30	90.73288184249103
Nano 30	90.7599439449829
Nano 30	90.77208827613603
Nano 30	91.05189594521562
Nano 30	90.71723949104872
Nano 30	90.70345581358835
Nano 30	90.49152355643176
Nano 30	90.6834062316711
Nano 30	90.77424422335683
Nano 30	90.76775567431642
Nano 30	90.89575019076526
Nano 30	90.76212839563497
Nano 30	90.74791107425258
Nano 30	90.70098195711132
Nano 30	90.7983149645243
Nano 30	90.75633453559848
Nano 30	91.0003378311535
Nano 30	90.97786390864626
Nano 30	90.86298949808977
Nano 30	90.1704303600243
Nano 30	90.87257645221412
Nano 30	90.67065325081659
Nano 30	90.81638633852909
Nano 30	90.58094175110921
Nano 30	90.71030160836409
Nano 30	90.64801701068217
Nano 30	90.61391164852002
Nano 30	90.55459355403535
Nano 30	90.7437013079813
Nano 30	90.62773021376637
Nano 30	90.60718873590763
Nano 30	90.52877121110619
Nano 30	91.17380679938665
Nano 30	90.50095711603869
Nano 30	90.42658283209397
Nano 30	91.068935445028
Nano 30	90.69550050082356
Nano 30	90.88973895942013
Nano 30	90.88777594445061
Nano 30	90.52248978185816
Nano 30	91.175537476436
Nano 30	90.11986001102748
Nano 30	90.68944946355302
Nano 30	90.79296548961526
Nano 30	90.89213290151903
Nano 30	90.93249833379781
Nano 30	90.93500048566968
Nano 30	90.28663366299189
Nano 30	90.60601168564452
Nano 30	90.88612291435429
Nano 30	90.41753182004732
Nano 30	90.94370276727585
Nano 30	90.71669260281433
Nano 30	90.60413615875066
Nano 30	90.55020616682573
Nano 30	90.0273701941106
Nano 30	90.71327656217323
Nano 30	90.5037410035469
Nano 30	90.59122142074116
Nano 30	90.69155977544278
Nano 30	90.85794057314452
Nano 30	90.71954684085003
Nano 30	90.91983121195982
Nano 30	91.15141374473221
Nano 30	91.03457243111583
Nano 30	90.67483229303909
Nano 30	91.04276279370391
Nano 30	90.56724908620795
Nano 30	90.61126453526597
Nano 30	90.63983472960038
Nano 30	90.79286387853878
Nano 30	91.26235851786096
Nano 30	90.72478013150644
Nano 30	90.32934920380359
Nano 30	91.09611204935696
Nano 30	90.5399177265447
Nano 30	90.65088542200081
Nano 30	90.5280643792787
Nano 30	90.88415625465247
Nano 30	90.72995938528408
Nano 30	90.9011652277367
Nano 30	90.51123044038495
Nano 30	90.59905453445566
Nano 30	90.39992694612384
Nano 30	91.05700623313105
Nano 30	91.14725940399167
Nano 30	90.66423598504528
Nano 30	90.81883099647209
Nano 30	90.75702847340294
Nano 30	90.70728945083917
Nano 30	90.6217979090802
Nano 30	90.79201344898775
Nano 30	90.4991329153875
Nano 30	90.82429293516303
Nano 30	91.18764055257842
Nano 30	90.74266667045866
Nano 30	90.94283293452493
Nano 30	90.45424117758908
Nano 30	90.86318508874234
Nano 30	91.31663045134779
Nano 30	90.48481859190395
Nano 30	90.5627948209489
Nano 30	90.59470516105345
Nano 30	90.76134752002889
Nano 30	90.54734698577892
Nano 30	90.83438164388882
Nano 30	90.45760290553879
Nano 30	91.05688722518117
Nano 30	90.7177964847006
Nano 30	90.70975872396562
Nano 30	91.15271744923456
Nano 30	90.97542431217705
Nano 30	90.45077083704928
Nano 30	90.55864795149635
Nano 30	90.66596757786901
Nano 30	91.27279235447239
Nano 30	90.59424866838567
Nano 30	91.22717724851418
Nano 30	90.62271103825228
Nano 30	91.42730936527896
Nano 30	90.70266788244429
Nano 30	90.94035213520608
Nano 30	90.92244170795138
Nano 30	90.71579396665007
Nano 30	90.43030807199871
Nano 30	90.71994063667104
Nano 30	91.12426630405986
Nano 30	90.62419911993148
Nano 30	90.67494340431648
Nano 30	90.4462174234456
Nano 30	90.6471788085386
Nano 30	90.53025447247757
Nano 30	90.88911919372123
Nano 30	90.80556819169301
Nano 30	90.3014806626759
Nano 30	90.66792190336317
Nano 30	90.66484817598077
Nano 30	91.11153007265285
Nano 30	91.08478554360855
Nano 30	90.79279160519313
Nano 30	90.71210159850969
Nano 30	91.1794436683977
Nano 30	90.53237718182437
Nano 30	90.54332653109235
Nano 30	90.87366776532056
Nano 30	90.92996821127211
Nano 30	90.36870552464295
Nano 30	90.94733751787193
Nano 30	90.75279754765069
Nano 30	91.20581878253756
Nano 30	91.06330442745808
Nano 30	90.90634077813102
Nano 30	90.5375992157481
Nano 30	90.59746213810021
Nano 30	90.37186208153695
Nano 30	90.70005370368645
Nano 30	90.86818749183351
Nano 30	90.70202933642443
Nano 30	91.1830803958736
Nano 30	90.84566270114463
Nano 30	90.81362838194744
Nano 30	91.00998512096895
Nano 30	91.04010061304552
Nano 30	90.78220324428004
Nano 30	91.11369754613791
Nano 30	90.99047882219976
Nano 30	91.17402843434502
Nano 30	90.53258194991736
Nano 30	90.989666311135
Nano 30	91.09562938269951
Nano 30	90.8192856171227
Nano 30	90.56654228187782
Nano 30	90.61334446030017
Nano 30	90.66490211962035
Nano 30	90.60730194302558
Nano 30	90.28501374867038
Nano 30	90.46536988773414
Nano 30	90.78816382687369
Nano 30	90.4280809128315
Nano 30	90.47383842622365
Nano 30	90.52394426727791
Nano 30	90.9600836886244
Nano 30	90.55817056575502
Nano 30	90.54040106620496
Nano 30	90.72975495850531
Nano 30	90.95012254437425
Nano 30	91.26744592433606
Nano 30	90.37681529698749
Nano 30	91.01814578980215
Nano 30	90.71505469880832
Nano 30	90.64244576260684
Nano 30	90.43910455893351
Nano 30	90.84331145327184
Nano 30	90.3598854575466
Nano 30	90.94773843160411
Nano 30	90.54449286230694
Nano 30	90.43619678015703
Nano 30	90.73223545248965
Nano 30	90.78191235917228
Nano 30	90.33549395835426
Nano 30	90.51129506105765
Nano 30	90.569727095245
Nano 30	90.64245315275296
Nano 30	90.9005290307258
Nano 30	90.4479653542018
Nano 30	90.86272529946254
Nano 30	90.77317284501353
Nano 30	90.9659622855478
Nano 30	90.6044718835702
Nano 30	90.62358919119293
Nano 30	90.52690217506922
Nano 30	90.36937717602179
Nano 30	90.6738668787375
Nano 30	90.88215577913468
Nano 30	90.77969033415673
Nano 30	90.5619168722143
Nano 30	90.71801257162332
Nano 30	90.25981012692942
Nano 30	90.87085759259026
Nano 30	90.87484170887403
Nano 30	90.82554762071078
Nano 30	90.52462986590506
Nano 30	90.81858136345443
Nano 30	90.79092144764783
Nano 30	90.92772987040401
Nano 30	90.68934421912226
Nano 30	90.51202250986644
Nano 30	91.10240486033935
Nano 30	90.9514798289268
Nano 30	91.18613073699932
Nano 30	91.13633910405498
Nano 30	91.32458686137987
Nano 30	90.70722801522902
Nano 30	90.53401164148478
Nano 30	90.97302595525794
Nano 30	90.47284909261225
Nano 30	90.55891236545055
Nano 30	90.52211806910891
Nano 30	90.89994288581693
Nano 30	90.82537844751877
Nano 30	90.61273041596219
Nano 30	90.37152321986578
Nano 30	90.68794404587261
Nano 30	91.3080324561578
Nano 30	90.66072889416844
Nano 30	90.67152438334003
Nano 30	90.52263451636
Nano 30	90.88766807833093
Nano 30	90.96277635897145
[truncated: 6,001 more rows]

## Sheet: Fig_6_supplement 1
day	fly_sample	nanobody	fly_number	selection	zdisk	band_distance	sarcomere_length					Nb of Z-disk extracted for each nanobody	Number of sarcomere for each nanobody	Number of animals
200818	1	Nano 42	1	7	2	187.63709004799404	3712.464803661145
200818	1	Nano 42	1	7	3	193.42699009381906	3685.5368380485775				Nano 2	215	103	7
200818	1	Nano 42	1	8	3	199.67811177343685	3683.278503091908				Nano 39	167	79	5
200818	1	Nano 42	1	10	3	205.5830833424469	3674.532785073964				Nano 30	787	499	11
200818	1	Nano 42	1	10	4	207.7213789854652	3712.032022647996				Nano 29	780	508	13
200818	1	Nano 42	1	17	2	199.5310438501425	3702.661175405136				Nano 33	173	61	5
200818	1	Nano 42	1	17	3	224.52983729522884	3717.0474891658973				Nano 35	155	79	5
200818	1	Nano 42	1	17	4	220.69524799147914	3707.604024144541				Nano 37	56	22	3
200818	1	Nano 42	1	19	2	205.73888464721102	3693.037816097281				Nano 42	183	91	6
200818	1	Nano 42	1	19	3	189.11854775338557	3675.8095969667515
200818	1	Nano 42	1	19	4	190.80417138938927	3712.6997903085603
200818	1	Nano 2	1	10	4	116.86151674922256	3700.2693783327113
200818	1	Nano 2	1	10	5	111.1707744273906	3728.6097024747132
200818	1	Nano 2	1	10	6	148.74957697435042	3729.555625230333
200818	1	Nano 2	1	13	2	116.14545189303959	3625.276312928543
200818	1	Nano 42	2	5	4	186.78019809545674	3935.7011213363485
200818	1	Nano 42	2	5	5	198.3214957231596	3911.334444381604
200818	1	Nano 42	2	5	6	182.4888925259717	3890.276060557782
200818	1	Nano 42	2	8	2	189.07351077013573	3703.269125960028
200818	1	Nano 42	2	8	3	210.66502635856708	3715.127431775317
200818	1	Nano 42	2	8	4	210.14022146735198	3723.1010832409575
200818	1	Nano 42	2	8	5	180.61743305172826	3761.0745720458613
200818	1	Nano 42	2	8	6	199.53763506501247	3764.5568526862
200818	1	Nano 42	2	10	2	181.47694446763103	3693.005583098828
200818	1	Nano 42	2	11	2	203.4459909985224	3699.164727161098
200818	1	Nano 42	2	11	3	198.9268284241932	3699.329931409481
200818	1	Nano 42	2	11	4	194.8360386880056	3732.1771185117855
200818	1	Nano 42	2	11	5	195.469103967079	3720.7879342866827
200818	1	Nano 42	2	11	6	184.9135869883424	3701.7439937293957
200818	1	Nano 42	2	11	7	188.41979886175918	3708.5649194763314
200818	1	Nano 42	2	12	2	233.44120060408835	3619.883097992732
200818	1	Nano 42	2	12	3	194.14788072490865	3646.707394860575
200818	1	Nano 42	2	12	4	197.8821641772021	3678.7060120402775
200818	1	Nano 42	2	12	5	192.48944953780486	3705.954604769071
200818	1	Nano 42	2	12	6	188.50313419983902	3699.129685197456
200818	1	Nano 42	2	12	7	164.3909495178454	3699.4353731762767
200818	1	Nano 42	2	12	8	184.9617505194513	3711.5293277458577
200818	1	Nano 42	2	12	9	183.851045263728	3696.313992194271
200818	1	Nano 42	2	12	10	177.66999734721878	3654.0686390164697
200818	1	Nano 42	2	12	11	175.5010557497638	3644.762877239082
200818	1	Nano 42	2	13	6	222.41992876365435	3687.7531413298993
200818	1	Nano 42	2	13	7	188.0553419178321	3697.409686653048
200818	1	Nano 42	2	15	2	209.46990729631332	3656.0337219516687
200818	1	Nano 42	2	15	3	196.996250736143	3676.762254538919
200818	1	Nano 42	2	15	4	194.864116384976	3698.1846311033855
200818	1	Nano 42	2	15	5	201.48254051697742	3738.4787861906457
200818	1	Nano 42	2	15	6	193.02452387027787	3749.1583461173163
200818	1	Nano 42	2	15	7	191.88568155618043	3746.0385146558974
200818	1	Nano 42	2	15	8	211.3495606012927	3727.367870837206
200818	1	Nano 42	2	15	9	188.84703718191247	3704.179823301097
200818	1	Nano 42	2	15	10	183.42764834237641	3742.048117645179
200818	1	Nano 42	2	15	11	225.59940950737143	3753.6159483586894
200818	1	Nano 42	2	23	8	216.59460987561062	3573.5393504462118
200818	1	Nano 2	2	15	4	125.24353031733595	3706.8581099736816
200818	1	Nano 2	2	16	3	105.03914436109864	3654.738376380537
200818	1	Nano 2	2	24	4	106.33342676101351	3625.143649786438
200818	1	Nano 2	3	2	2	72.96498941841847	3539.7762918566573
200818	1	Nano 2	3	2	3	70.93742862180541	3551.1892338188263
200818	1	Nano 2	3	2	4	97.4695420885682	3563.8100950909243
200818	1	Nano 2	3	2	5	74.50874277340802	3548.7807566110687
200818	1	Nano 2	3	2	6	93.8691493943236	3526.311627813861
200818	1	Nano 2	3	4	4	73.69148169445594	3562.779980475429
200818	1	Nano 2	3	6	15	92.75248277375795	3566.3914527502398
200818	1	Nano 2	3	6	16	88.58074642892461	3541.278953569138
200818	1	Nano 2	3	6	17	95.33589817329698	3543.3707046513396
200818	1	Nano 2	3	7	9	103.53689436066105	3637.887521554967
200818	1	Nano 2	3	7	10	96.90840406987549	3617.294867257406
200818	1	Nano 2	3	8	7	101.56950387001785	3555.511547734749
200818	1	Nano 2	3	8	8	94.26291150624736	3590.438039772881
200818	1	Nano 2	3	9	17	82.70033274323623	3541.2901853015724
200818	1	Nano 2	3	10	2	90.92414577561131	3597.8349786138697
200818	1	Nano 2	3	10	3	88.81902181893308	3595.3900957692326
200818	1	Nano 2	3	11	2	88.04980800268652	3564.4790259749047
200818	1	Nano 2	3	11	3	91.13644691906929	3571.5003604388485
200818	1	Nano 2	3	11	4	77.20112832739458	3580.4906383515704
200818	1	Nano 2	3	12	8	99.16202036030342	3693.825062440782
200818	1	Nano 2	3	12	9	95.35486158990408	3724.6911857701375
200818	1	Nano 2	3	14	2	95.32696335080942	3627.282175378373
200818	1	Nano 2	3	14	3	85.50226553147938	3603.8814326868123
200818	1	Nano 2	3	14	4	89.89408664928135	3614.440104580489
200818	1	Nano 2	3	15	5	94.18253002607031	3631.936961749696
200818	1	Nano 2	3	15	6	94.1899732961116	3630.2620038411233
200818	1	Nano 2	3	15	7	91.31950516294096	3646.774882909845
200818	1	Nano 2	3	15	8	92.19315367072511	3664.088266635379
200818	1	Nano 2	3	16	2	103.40253105112848	3610.7996526163984
200818	1	Nano 2	3	16	3	92.7463078291654	3621.2755860455018
200818	1	Nano 2	3	16	4	94.37159330824444	3599.553383257269
200818	1	Nano 2	3	16	5	98.2130318066612	3601.485388615857
200818	1	Nano 2	3	17	2	97.10903394849886	3568.0328981741563
200818	1	Nano 2	3	17	3	82.36186285285335	3558.8003061993404
200818	1	Nano 2	3	21	2	87.19107527114102	3594.8677080745274
200818	1	Nano 2	3	21	3	90.48493704710195	3590.354887236827
200818	1	Nano 2	3	21	4	100.66055391694931	3590.0252122209376
200818	1	Nano 2	3	21	5	96.56348295234379	3592.728393739807
200818	1	Nano 2	3	24	2	96.33244500845035	3594.396192756279
200818	1	Nano 2	3	27	10	85.19873742609036	3644.2107944765917
200818	2	Nano 39	1	7	2	198.6696427921373	3645.8226542899256
200818	2	Nano 39	1	7	3	193.8384127689048	3622.1328474730662
200818	2	Nano 39	1	14	6	186.24023408554024	3657.990756126633
200819	3	Nano 30	1	1	2	165.96239679866744	3626.728167497402
200819	3	Nano 30	1	2	2	168.92186859570631	3596.6048425496856
200819	3	Nano 30	1	2	3	173.48546910268342	3574.481394968191
200819	3	Nano 30	1	2	4	155.042223757668	3583.4483449476184
200819	3	Nano 30	1	4	2	172.4105409277571	3623.126864768324
200819	3	Nano 30	1	4	3	175.00798760754122	3579.8270359201592
200819	3	Nano 30	1	6	2	189.84923621130008	3992.904542276955
200819	3	Nano 30	1	6	3	182.39860328917146	4004.475223857953
200819	3	Nano 30	1	6	4	185.6493544181416	3984.3130137287267
200819	3	Nano 30	1	6	5	179.5821949007214	3939.2172810786187
200819	3	Nano 30	1	6	6	167.64593822311326	3917.002432873687
200819	3	Nano 30	1	6	7	177.51748856402173	3880.9827352209422
200819	3	Nano 30	1	6	8	176.95773034004588	3843.005994363425
200819	3	Nano 30	1	6	9	169.30359306416162	3791.302048986891
200819	3	Nano 30	1	6	10	161.0462965685815	3736.0969773095812
200819	3	Nano 30	1	6	11	160.70602869343475	3701.8227082426893
200819	3	Nano 30	1	7	6	171.57802002751882	3901.5216752463593
200819	3	Nano 30	1	7	7	179.17712039030647	3855.362730779541
200819	3	Nano 30	1	7	8	166.0310494997924	3826.0224953872694
200819	3	Nano 30	1	7	9	178.10429756377488	3784.657076194747
200819	3	Nano 30	1	7	10	176.65221604130463	3751.7979535271415
200819	6	Nano 29	1	2	2	255.928049959827	3452.6787061268433
200819	6	Nano 29	1	2	3	241.94090082702687	3424.2756488217706
200819	6	Nano 29	1	2	4	245.95538413958863	3413.9383795738204
200819	6	Nano 29	1	3	2	251.33784017920368	3381.7022702125983
200819	6	Nano 29	1	3	3	228.97024089539863	3382.804902527398
200819	6	Nano 29	1	3	4	243.11733378802668	3409.257250544501
200819	6	Nano 29	1	3	5	232.27613077821619	3431.8841203947422
200819	6	Nano 29	1	5	2	251.49755935159587	3433.2767436478057
200819	6	Nano 29	1	5	3	251.54345375400246	3440.6666200500763
200819	6	Nano 29	1	5	4	249.7105275312143	3419.5445202310466
200819	6	Nano 29	1	5	5	251.54981433096023	3415.5692463338532
200819	6	Nano 29	1	5	6	251.18779544852174	3409.281176377437
200819	6	Nano 29	1	5	7	258.1636394265544	3416.7564005180266
200819	6	Nano 29	1	10	2	202.56774908993432	3416.9997052496997
200819	6	Nano 29	1	10	3	265.59441714604617	3441.0110629175897
200819	6	Nano 29	1	10	4	246.57455819694025	3511.4673708588757
200819	6	Nano 29	1	10	5	262.07191804441936	3525.0708093204803
200819	6	Nano 29	1	10	6	254.0652909540421	3525.993966322726
200819	6	Nano 29	1	10	7	254.79308933426069	3508.9301774031187
200819	6	Nano 29	1	10	8	251.14732041407245	3491.489248920516
200819	6	Nano 29	1	10	9	255.5869231243642	3520.475351428384
200819	6	Nano 29	1	10	10	260.2477720954255	3529.1907739243957
200819	6	Nano 29	1	10	11	262.13851495241613	3541.6062526727446
200819	6	Nano 29	1	10	12	249.61672068264758	3532.193890153649
200819	6	Nano 29	1	10	13	247.79486085155102	3514.956564147934
200819	6	Nano 29	1	10	14	258.9370230952261	3567.0318230660273
200819	6	Nano 29	1	11	6	249.11921968086966	3562.345749659173
200819	6	Nano 29	1	11	7	236.2346256093781	3555.0485635970585
200819	6	Nano 29	1	11	8	244.50217877534385	3560.237370865108
200819	6	Nano 29	1	11	9	241.80791772103817	3563.728062101332
200819	6	Nano 29	1	12	13	236.99252351164318	3550.7464632754686
200819	6	Nano 29	1	12	14	232.74179085480168	3566.907960227226
200819	6	Nano 29	1	12	15	234.8615708186719	3575.477364208705
200819	6	Nano 29	1	12	16	239.17144183776767	3568.1951820519253
200819	6	Nano 29	1	12	17	226.05958681530132	3564.8256571823053
200819	6	Nano 29	1	12	18	223.9101798764636	3561.513409279701
200819	6	Nano 29	1	12	19	234.47422544308893	3577.004268580658
200819	6	Nano 29	1	14	10	234.91597840628452	3580.899183955918
200819	6	Nano 29	1	14	11	237.24690067365262	3627.566313156944
200819	6	Nano 29	1	15	2	235.3144405629609	3511.875134984665
200819	6	Nano 29	1	15	3	221.353605075337	3498.287623071364
200819	6	Nano 29	1	15	4	239.51853820963643	3481.290035944693
200819	6	Nano 29	1	15	5	233.21029117742683	3504.60096431716
200819	6	Nano 29	1	15	6	235.60765682141326	3527.990019945313
200819	6	Nano 29	1	15	7	235.99371506442486	3544.234349798284
200819	6	Nano 29	1	15	8	220.06572249515244	3535.455198070939
200819	6	Nano 29	1	15	9	227.96219803774414	3530.1681336703086
200819	6	Nano 29	1	15	10	241.59432689024243	3518.2540443289977
200819	6	Nano 29	1	15	11	222.4207628393782	3514.3823600279275
200819	6	Nano 29	1	15	12	222.47231079857158	3555.5979229657537
200819	6	Nano 29	1	16	8	238.83443477481904	3544.8419167578245
200819	6	Nano 29	1	16	9	233.94950141733318	3567.5423993431873
200819	6	Nano 29	1	16	10	238.6374895333421	3585.18312416702
200819	6	Nano 29	1	16	11	221.32725193507213	3605.2771312688906
200819	6	Nano 29	1	16	12	225.88563954959167	3609.8398596375096
200819	6	Nano 29	1	17	2	233.8149222065677	3524.3419675064715
200819	6	Nano 29	1	19	2	218.5465813021006	3485.1556511705953
200819	6	Nano 29	1	19	3	204.30513618450985	3490.4781479111894
200819	6	Nano 29	1	19	4	199.63389313174042	3512.630492670093
200819	6	Nano 30	1	2	9	189.09761875160854	3479.065332292997
200819	6	Nano 30	1	3	3	189.79062950225602	3393.703222656537
200819	6	Nano 30	1	3	4	184.7149701030051	3418.1271695892096
200819	6	Nano 30	1	4	3	207.5630013055137	3405.412196066366
200819	6	Nano 30	1	5	2	195.9449331135659	3438.178273165892
200819	6	Nano 30	1	5	3	191.5422344026448	3449.6015319445455
200819	6	Nano 30	1	5	4	190.75034346669202	3426.713316453887
200819	6	Nano 30	1	5	5	183.27761213578515	3418.9876374556698
200819	6	Nano 30	1	6	6	173.09422838092732	3491.9272454301545
200819	6	Nano 30	1	6	7	198.89919566667885	3461.1043312961574
200819	6	Nano 30	1	6	8	188.07782138834483	3462.9921295542495
200819	6	Nano 30	1	6	9	194.32443978274026	3472.876414306037
200819	6	Nano 30	1	9	20	187.4638543231208	3536.1819120495866
200819	6	Nano 30	1	10	6	200.30495920396615	3526.0832617400065
200819	6	Nano 30	1	10	7	193.98928455710202	3507.180929111876
200819	6	Nano 30	1	10	8	181.47931932025784	3492.975466728444
200819	6	Nano 30	1	10	9	200.26422740231342	3524.131618247913
200819	6	Nano 30	1	10	10	205.8624748488501	3535.947196857567
200819	6	Nano 30	1	10	11	201.7944714041613	3535.4140061060107
200819	6	Nano 30	1	10	12	200.25342494259465	3530.1112295915004
200819	6	Nano 30	1	11	18	183.79397555367177	3570.678666421952
200819	6	Nano 30	1	12	14	192.0477850629635	3572.9765307634057
200819	6	Nano 30	1	12	15	185.6556191225053	3587.8636200966644
200819	6	Nano 30	1	12	16	213.06331443386745	3569.519682508716
200819	6	Nano 30	1	12	17	169.9706129943161	3558.4211938549092
200819	6	Nano 30	1	12	18	162.24124610964626	3562.916240235963
200819	6	Nano 30	1	12	19	183.5094744881195	3578.091252104948
200819	6	Nano 30	1	14	13	184.2259471644928	3613.547345373228
200819	6	Nano 30	1	15	9	208.8630821348789	3534.5502410726594
200819	6	Nano 30	1	15	10	196.8202345341996	3518.7099291550653
200819	6	Nano 30	1	15	11	175.5304524031697	3525.59138448936
200819	6	Nano 30	1	15	12	186.74696284253517	3557.770634627172
200819	6	Nano 30	1	16	12	155.7230569727045	3610.5136187968606
200819	6	Nano 29	2	1	5	174.35165247714338	3715.603360257863
200819	6	Nano 29	2	1	6	191.06141583300484	3694.821360592774
200819	6	Nano 29	2	1	7	193.21601506845013	3668.8652068562737
200819	6	Nano 29	2	1	8	194.21114615397158	3702.803950280827
200819	6	Nano 29	2	1	9	209.9748426706773	3717.056654222836
200819	6	Nano 29	2	1	10	205.3497641061324	3700.579482921332
200819	6	Nano 29	2	1	11	196.57766755071748	3698.562171600163
200819	6	Nano 29	2	1	12	204.42600780251723	3698.165121513072
200819	6	Nano 29	2	1	13	194.374605132976	3695.5757032464116
200819	6	Nano 29	2	2	9	184.71438947829319	3685.2395003575484
200819	6	Nano 29	2	2	10	187.18015313613137	3675.5861195524494
200819	6	Nano 29	2	2	11	201.08346510786015	3646.046958991782
200819	6	Nano 29	2	2	12	201.0315665037268	3646.270893363307
200819	6	Nano 29	2	2	13	191.3953933018951	3646.478930523479
200819	6	Nano 29	2	2	14	190.1177461275296	3636.2645892550586
200819	6	Nano 29	2	2	15	198.73139647561288	3635.5787578666095
200819	6	Nano 29	2	2	16	202.13360040846908	3637.7346808400703
200819	6	Nano 29	2	2	17	199.79847815812494	3655.6516817578554
200819	6	Nano 29	2	3	2	216.09387716819438	3658.8381314458534
200819	6	Nano 29	2	3	3	199.3435586298165	3673.6011949937324
200819	6	Nano 29	2	3	4	207.5381710962056	3660.756953650391
200819	6	Nano 29	2	3	5	196.8341589732249	3675.4627231483314
200819	6	Nano 29	2	3	6	202.6930223098404	3687.697221755096
200819	6	Nano 29	2	3	7	192.67296220200225	3702.7478743285938
200819	6	Nano 29	2	3	8	195.45686341419758	3711.632979671936
200819	6	Nano 29	2	3	9	192.11854987955604	3670.2906697309013
200819	6	Nano 29	2	3	10	190.8276615200458	3677.9879248568377
200819	6	Nano 29	2	4	2	211.0507105861925	3586.8812805884227
200819	6	Nano 29	2	4	3	215.6301396686001	3588.335194539659
200819	6	Nano 29	2	4	4	213.28998028243302	3613.365040068904
200819	6	Nano 29	2	4	5	206.1050588430701	3598.21576279961
200819	6	Nano 29	2	4	6	214.54702777787674	3563.780091386958
200819	6	Nano 29	2	4	7	213.41930615798958	3549.176766562053
200819	6	Nano 29	2	5	2	225.78090826550635	3777.4826747818734
200819	6	Nano 29	2	5	3	218.0962843862136	3775.620236168306
200819	6	Nano 29	2	5	4	211.66594671035025	3758.44980671385
200819	6	Nano 29	2	5	5	213.97469940804953	3732.7458601921344
200819	6	Nano 29	2	5	6	219.2617447857771	3737.5151995740175
200819	6	Nano 29	2	5	7	218.567847557062	3731.708791866725
200819	6	Nano 29	2	5	8	206.84951010856426	3703.0542918885462
200819	6	Nano 29	2	6	2	215.49061386999475	3722.2245345866118
200819	6	Nano 29	2	6	3	226.2184984047478	3697.985996399075
200819	6	Nano 29	2	6	4	213.5834845565482	3681.3109165868823
200819	6	Nano 29	2	6	5	215.04362532514165	3691.667879840625
200819	6	Nano 29	2	6	6	235.1771345759684	3689.955706036723
200819	6	Nano 29	2	6	7	210.4227303957433	3696.9432383626563
200819	6	Nano 29	2	6	8	213.14848651611584	3693.7840187222087
200819	6	Nano 29	2	6	9	200.1314098900673	3680.425780466693
200819	6	Nano 29	2	6	10	204.57899631649585	3684.3393533870094
200819	6	Nano 29	2	6	11	212.043420219012	3700.783525955322
200819	6	Nano 29	2	6	12	199.82714479052106	3695.626760546895
200819	6	Nano 29	2	6	13	215.12973632117112	3706.88422947162
200819	6	Nano 29	2	7	2	221.39109562790833	3625.598196089859
200819	6	Nano 29	2	7	3	227.97036754528253	3596.6745319392057
200819	6	Nano 29	2	7	4	219.3236603942151	3596.837926561561
200819	6	Nano 29	2	7	5	222.75693955494282	3601.7788543899933
200819	6	Nano 29	2	7	6	223.4403779701634	3590.106579753747
200819	6	Nano 29	2	7	7	207.74014688114903	3571.717358286974
200819	6	Nano 29	2	8	9	216.4563926131817	3544.5229062333797
200819	6	Nano 29	2	8	10	217.06354430803486	3561.6801359665833
200819	6	Nano 29	2	8	11	214.1696491963512	3515.7831314125237
200819	6	Nano 29	2	8	12	211.69338302591086	3445.6188611100106
200819	6	Nano 29	2	8	13	217.88212935244306	3431.663306502034
200819	6	Nano 29	2	8	14	203.48272437877145	3447.884617871964
200819	6	Nano 29	2	8	15	206.56489917977862	3446.790372119765
200819	6	Nano 29	2	8	16	200.65521669205623	3467.863506944225
200819	6	Nano 29	2	8	17	193.7963076968504	3488.708965930711
200819	6	Nano 29	2	8	18	196.6708717916657	3497.6436933067794
200819	6	Nano 29	2	9	2	240.18193849689965	3699.6494657779213
200819	6	Nano 29	2	9	3	241.22987680436717	3685.002157974058
200819	6	Nano 29	2	10	2	238.78483920257287	3741.402449157297
200819	6	Nano 29	2	10	3	236.43779087593387	3770.64432095068
200819	6	Nano 29	2	10	4	234.98714945843486	3732.177973452526
200819	6	Nano 29	2	10	5	225.70049827789603	3714.8660855044895
200819	6	Nano 29	2	10	6	239.2564577317225	3734.8766227536908
200819	6	Nano 29	2	10	7	234.64344791788082	3725.2433734710085
200819	6	Nano 29	2	10	8	223.91758360595475	3752.5240461640333
200819	6	Nano 29	2	10	9	217.1646062990274	3770.198281582703
200819	6	Nano 29	2	10	10	215.3153170557908	3758.621852005185
200819	6	Nano 29	2	10	11	222.79516514304126	3773.7797464511277
200819	6	Nano 29	2	10	12	212.7578249819891	3781.3529461843327
200819	6	Nano 29	2	10	13	215.86227312167526	3746.746666654372
200819	6	Nano 29	2	10	14	214.20440509883576	3718.195511088241
200819	6	Nano 29	2	10	15	214.2578162566224	3723.7734299243843
200819	6	Nano 29	2	11	2	242.50934672542527	3693.7763225379736
200819	6	Nano 29	2	11	3	246.46195011895225	3713.907558162165
200819	6	Nano 29	2	11	4	236.23853223839103	3720.1486515143324
200819	6	Nano 29	2	11	5	234.48189704262646	3726.426594400121
200819	6	Nano 29	2	11	6	232.49354314582007	3704.700991651944
200819	6	Nano 29	2	11	7	237.12050200248055	3651.1504230061055
200819	6	Nano 29	2	11	8	236.04978750252738	3645.699394028607
200819	6	Nano 29	2	11	9	235.28110946512496	3654.20834917556
200819	6	Nano 29	2	11	10	231.8112017646468	3686.7668613405
200819	6	Nano 29	2	11	11	219.08734510242425	3702.8711829655485
200819	6	Nano 29	2	12	2	233.50493483174455	3675.647972390407
200819	6	Nano 29	2	12	3	246.45315595139226	3683.4163222155657
200819	6	Nano 29	2	12	4	239.9499929512534	3699.884403815533
200819	6	Nano 29	2	12	5	243.25374520708846	3694.3626521664473
200819	6	Nano 29	2	12	6	236.16398213988842	3691.475152623353
200819	6	Nano 29	2	12	7	232.67699427755642	3696.9218448380657
200819	6	Nano 29	2	12	8	231.6674428569985	3709.6218672858895
200819	6	Nano 29	2	12	9	250.98152626390743	3733.1850490218358
200819	6	Nano 29	2	12	10	249.04992358166908	3742.465436319782
200819	6	Nano 29	2	12	11	243.10553989595803	3745.9551526052937
200819	6	Nano 29	2	12	12	217.4500917150453	3751.9393131509214
200819	6	Nano 29	2	12	13	239.2343699429034	3745.8946335961055
200819	6	Nano 29	2	12	14	238.9560636024617	3710.419716193869
200819	6	Nano 29	2	12	15	235.16955923084882	3682.380529574276
200819	6	Nano 29	2	12	16	233.2266894708124	3681.813405752679
200819	6	Nano 29	2	13	2	236.9751112265609	3770.174396411071
200819	6	Nano 29	2	13	3	246.9987763253933	3783.10161178526
200819	6	Nano 29	2	13	4	239.5428938898981	3792.0932703505296
200819	6	Nano 29	2	13	5	234.31296723610905	3791.939355161003
200819	6	Nano 29	2	13	6	248.47056579857025	3791.456927825894
200819	6	Nano 29	2	13	7	252.5947207970196	3802.5535026361263
200819	6	Nano 29	2	13	8	229.98320018979598	3778.647060302573
200819	6	Nano 29	2	13	9	240.3675710755431	3780.8451512698966
200819	6	Nano 29	2	13	10	243.0361847602819	3774.424030250097
200819	6	Nano 29	2	13	11	228.2947095834703	3766.939893069934
200819	6	Nano 29	2	13	12	240.42073665123607	3786.827308419975
200819	6	Nano 29	2	14	2	242.72148515028505	3659.454861268245
200819	6	Nano 29	2	14	3	235.9363422498194	3678.717722849081
200819	6	Nano 29	2	14	4	237.23664113058703	3709.3700466922387
200819	6	Nano 29	2	15	4	238.2516079069231	3627.714543801999
200819	6	Nano 29	2	15	5	247.57318095004	3683.6527366032183
200819	6	Nano 29	2	15	6	239.24778423182167	3655.706490395933
200819	6	Nano 29	2	15	7	252.02641493245892	3597.0025824738714
200819	6	Nano 29	2	15	8	243.8362217628463	3638.5552397852543
200819	6	Nano 29	2	15	9	238.25068493504745	3709.721084181741
200819	6	Nano 29	2	15	10	231.61579739497884	3757.3979087404823
200819	6	Nano 29	2	16	2	235.7442635420348	3745.703261177009
200819	6	Nano 29	2	16	3	232.51012552353282	3769.1249966548503
200819	6	Nano 29	2	16	4	232.34214198914933	3776.014561066521
200819	6	Nano 29	2	16	5	242.20171393529358	3742.272125728277
200819	6	Nano 29	2	16	6	237.71739110470605	3714.773644022776
200819	6	Nano 29	2	16	7	227.1990965203489	3713.118781012729
200819	6	Nano 30	2	1	8	170.35744521815732	3710.2688070390473
200819	6	Nano 30	2	1	9	160.05026846934268	3720.043099833786
200819	6	Nano 30	2	1	10	143.37182816133918	3702.491769969836
200819	6	Nano 30	2	1	11	173.21308933910245	3702.7021986194923
200819	6	Nano 30	2	1	12	155.41735259029053	3702.724459994714
200819	6	Nano 30	2	1	13	167.61069609635229	3697.0370969161145
200819	6	Nano 30	2	2	12	169.57883872093987	3653.1742929442535
200819	6	Nano 30	2	3	2	173.37605815721946	3669.1191239987843
200819	6	Nano 30	2	3	3	175.1859444800841	3673.283116066637
200819	6	Nano 30	2	3	4	166.47129432600522	3661.3127499763855
200819	6	Nano 30	2	3	5	162.60357708706752	3680.591566505689
200819	6	Nano 30	2	3	6	169.1473907164746	3698.72300732019
200819	6	Nano 30	2	3	7	170.30313724165498	3712.1654638269783
200819	6	Nano 30	2	3	8	172.29570294346274	3711.905488070605
200819	6	Nano 30	2	3	9	158.9048814435566	3672.950833091994
200819	6	Nano 30	2	3	10	145.57249618781557	3675.5804371249687
200819	6	Nano 30	2	3	11	156.6421083748628	3717.0989548998577
200819	6	Nano 30	2	4	4	177.96123866728408	3622.273477790091
200819	6	Nano 30	2	4	5	153.84622490407253	3599.0020840940997
200819	6	Nano 30	2	5	2	163.56200880902372	3788.161797956964
200819	6	Nano 30	2	6	2	181.70134216162128	3735.0636646219536
200819	6	Nano 30	2	6	3	183.2329017322492	3704.0631337409222
200819	6	Nano 30	2	6	4	167.78616705419088	3680.853762936245
200819	6	Nano 30	2	6	5	166.6340426745451	3690.572156497259
200819	6	Nano 30	2	6	6	182.42910355944926	3699.2613914065746
200819	6	Nano 30	2	6	7	151.6015597611943	3698.9092846060244
200819	6	Nano 30	2	6	8	170.06740864605945	3693.7346668539776
200819	6	Nano 30	2	6	9	161.86590737544037	3684.477009828034
200819	6	Nano 30	2	6	10	168.5373220747266	3681.2389949181797
200819	6	Nano 30	2	6	11	159.11382234959262	3706.3073274547837
200819	6	Nano 30	2	6	12	168.19205747323792	3704.155914033138
200819	6	Nano 30	2	6	13	158.29113112680943	3706.605695677818
200819	6	Nano 30	2	6	14	160.95298836894017	3743.1195370725018
200819	6	Nano 30	2	6	15	160.5813239641128	3750.0208727201957
200819	6	Nano 30	2	6	16	168.93544743783875	3731.093562563111
200819	6	Nano 30	2	7	3	176.22362317745282	3597.7707476742057
200819	6	Nano 30	2	7	4	173.8082673652367	3596.9281898110585
200819	6	Nano 30	2	7	5	175.46840858472007	3604.1613855366413
200819	6	Nano 30	2	7	6	185.98715307741344	3592.1675635475867
200819	6	Nano 30	2	7	7	177.9196268491603	3574.7785835373666
200819	6	Nano 30	2	8	8	170.52290580953354	3517.851330862033
200819	6	Nano 30	2	8	9	174.38856429823605	3545.1840753452443
200819	6	Nano 30	2	8	10	177.49705383625385	3564.625758827011
200819	6	Nano 30	2	8	11	167.55257784083994	3515.5554825001323
200819	6	Nano 30	2	8	12	178.19506012443696	3448.599791969011
200819	6	Nano 30	2	8	13	170.82365174594432	3434.5832567278558
200819	6	Nano 30	2	9	2	190.99611239848832	3694.93492602345
200819	6	Nano 30	2	9	3	186.5051329442812	3687.9629910856233
200819	6	Nano 30	2	10	2	182.884907136766	3743.2361515479797
200819	6	Nano 30	2	10	3	192.0065093596392	3782.093004506818
200819	6	Nano 30	2	10	4	190.2799189096633	3735.884234265853
200819	6	Nano 30	2	10	5	177.71882411876038	3714.5616691529663
200819	6	Nano 30	2	10	6	187.93660444041248	3745.202911818762
200819	6	Nano 30	2	10	7	184.9905134041094	3727.3376959096995
200819	6	Nano 30	2	10	8	167.9202389488708	3748.3094843870913
200819	6	Nano 30	2	10	9	166.02968994945542	3776.270547983991
200819	6	Nano 30	2	10	10	172.4973405578936	3764.816576135027
200819	6	Nano 30	2	10	11	178.06305768724712	3770.7279124750316
200819	6	Nano 30	2	10	12	174.5259509818982	3782.738359248299
200819	6	Nano 30	2	10	13	170.69346802716382	3752.069196419192
200819	6	Nano 30	2	11	2	184.78352356613902	3694.284425471631
200819	6	Nano 30	2	11	3	177.2315204588834	3722.0693781798436
200819	6	Nano 30	2	11	4	181.0555169619363	3730.047648331708
200819	6	Nano 30	2	11	5	181.00340595738913	3730.7060619704885
200819	6	Nano 30	2	11	6	178.61239783908303	3707.272866313796
200819	6	Nano 30	2	11	7	169.7879486074683	3647.076834563305
200819	6	Nano 30	2	11	8	185.35910191958718	3647.2239420251135
200819	6	Nano 30	2	11	9	190.6588293753004	3653.6022721703807
200819	6	Nano 30	2	11	10	171.89133164513692	3691.3510033115776
200819	6	Nano 30	2	11	11	172.42863953509982	3706.9667306429087
200819	6	Nano 30	2	11	12	170.59851297970283	3668.587532803725
200819	6	Nano 30	2	12	2	166.20180055508405	3675.470622636859
200819	6	Nano 30	2	12	3	184.4296143577948	3686.953832286673
200819	6	Nano 30	2	12	4	193.40111858745357	3703.877090307632
200819	6	Nano 30	2	12	5	194.81630653086685	3698.3593924784636
200819	6	Nano 30	2	12	6	177.2839974579275	3695.728273898059
200819	6	Nano 30	2	12	7	175.48602195496898	3699.6244680939094
200819	6	Nano 30	2	12	8	184.20426617920327	3710.623207546945
200819	6	Nano 30	2	12	9	183.95496921198628	3737.1995349631898
200819	6	Nano 30	2	12	10	182.4342550982624	3749.674602188169
200819	6	Nano 30	2	12	11	169.8938751764081	3745.0482650583003
200819	6	Nano 30	2	12	12	179.67223878689197	3747.0332612112957
200819	6	Nano 30	2	12	13	171.23185290000382	3747.5704202384572
200819	6	Nano 30	2	13	4	187.6295244134685	3794.3715683447963
200819	6	Nano 30	2	13	5	182.7035463711418	3794.6248790072323
200819	6	Nano 30	2	13	6	207.5247350342781	3799.2890605551534
200819	6	Nano 30	2	13	7	176.77653209629653	3801.8454691524
200819	6	Nano 30	2	13	8	189.55320496146214	3779.9709085919812
200819	6	Nano 30	2	13	9	182.19653304103215	3782.9902504050615
200819	6	Nano 30	2	13	10	194.27767888042527	3772.841860921803
200819	6	Nano 30	2	14	2	192.4330040283461	3659.780252222796
200819	6	Nano 30	2	14	3	181.35630525824985	3685.4359701337817
200819	6	Nano 30	2	14	4	179.85609695555794	3712.961912774869
200819	6	Nano 30	2	14	5	190.18136066734627	3678.078699563728
200819	6	Nano 30	2	14	6	185.03023343454655	3704.2467066118847
200819	6	Nano 30	2	14	7	179.5394339617897	3744.119883817746
200819	6	Nano 30	2	14	8	181.87604517891398	3691.915535673808
200819	6	Nano 30	2	14	9	185.79281327083976	3677.870317109481
200819	6	Nano 30	2	15	2	186.0108512924548	3631.9730182524654
200819	6	Nano 30	2	15	3	199.99219572079318	3593.944854741704
200819	6	Nano 30	2	15	4	189.0883858331472	3631.198332716449
200819	6	Nano 30	2	15	5	173.02276364966758	3691.514663304421
200819	6	Nano 30	2	15	6	193.77448975159862	3653.001576592511
200819	6	Nano 30	2	15	7	180.77879477935426	3597.2009653127125
200819	6	Nano 30	2	15	8	194.0339852090784	3643.0421905488734
200819	6	Nano 30	2	16	2	181.11107707848763	3749.5365417502894
200819	6	Nano 30	2	16	3	179.26618357706474	3778.213364676842
200819	6	Nano 30	2	16	4	193.1862687638987	3778.835005335694
200819	6	Nano 29	3	2	6	204.64293543465854	3437.3300778556127
200819	6	Nano 29	3	2	7	231.87124241308172	3432.101920962027
200819	6	Nano 29	3	2	8	247.3226163095279	3422.986192008936
200819	6	Nano 29	3	6	2	230.2682996790821	3407.0997687477256
200819	6	Nano 29	3	6	3	229.09641011256267	3385.9909179635274
200819	6	Nano 29	3	6	4	216.45486989623816	3386.115096802355
200819	6	Nano 29	3	6	5	196.02194800660968	3395.804877574599
200819	6	Nano 29	3	6	6	224.07202544664668	3400.1061840727125
200819	6	Nano 29	3	7	18	220.05194600728203	3407.1174415512482
200819	6	Nano 29	3	8	5	208.0218854036396	3419.322519414681
200819	6	Nano 29	3	8	6	209.60718569138126	3486.239520059237
200819	6	Nano 29	3	9	3	223.86884419604428	3514.345782426343
200819	6	Nano 29	3	9	4	213.7952200274583	3514.2437702613624
200819	6	Nano 29	3	9	5	214.56267466398967	3525.8699640510163
200819	6	Nano 29	3	9	6	208.43175490011558	3519.346682506339
200819	6	Nano 29	3	9	7	211.01682229351184	3490.3448358701417
200819	6	Nano 29	3	9	8	228.43693640876324	3469.9368711086977
200819	6	Nano 29	3	9	9	215.67665543595126	3472.671156215606
200819	6	Nano 29	3	9	10	217.53707453716686	3474.9532536894426
200819	6	Nano 29	3	11	5	226.2951570330367	3568.89667244433
200819	6	Nano 29	3	11	6	214.84562992822305	3574.445470324407
200819	6	Nano 29	3	11	7	216.5812307929056	3540.490683136107
200819	6	Nano 29	3	11	8	223.4982728308344	3540.8139516125293
200819	6	Nano 29	3	11	9	220.56011114512413	3540.03566670867
200819	6	Nano 29	3	12	12	216.2186509998412	3577.1820407291552
200819	6	Nano 29	3	12	13	218.7833011775081	3585.333628834032
200819	6	Nano 29	3	12	14	221.02076095296127	3559.2776499120105
200819	6	Nano 29	3	14	2	224.72519313595348	3570.6194673437394
200819	6	Nano 29	3	14	3	225.8783835985272	3578.3424766699786
200819	6	Nano 29	3	14	4	228.31779651976063	3561.910507804945
200819	6	Nano 29	3	15	2	218.68434030603612	3590.6679219094513
200819	6	Nano 29	3	15	3	232.47045959622875	3592.091905662271
200819	6	Nano 29	3	15	4	231.83943984775726	3608.925373368592
200819	6	Nano 29	3	15	5	231.37591447193245	3631.497909294944
200819	6	Nano 29	3	15	6	218.29561649461647	3642.526385135107
200819	6	Nano 29	3	16	2	228.49177151260776	3536.340793633548
200819	6	Nano 29	3	16	3	215.14484042023227	3520.9050429878835
200819	6	Nano 29	3	16	4	224.02360371660168	3552.4106453852314
200819	6	Nano 29	3	16	5	221.77720239466453	3556.3149245806835
200819	6	Nano 29	3	16	6	225.60229855104268	3549.144448843081
200819	6	Nano 29	3	16	7	229.5146365557269	3560.188354665998
200819	6	Nano 29	3	17	4	218.2165118872858	3622.558100223709
200819	6	Nano 29	3	17	5	226.23545889334181	3586.1651142026794
200819	6	Nano 29	3	17	6	229.1519887323986	3568.9471553032704
200819	6	Nano 29	3	19	2	220.35820621895203	3497.5110178365253
200819	6	Nano 29	3	19	3	228.51654370044685	3518.881793603537
200819	6	Nano 30	3	2	8	188.86137823077493	3437.058242975657
200819	6	Nano 30	3	4	12	187.08860900105947	3483.426274577804
200819	6	Nano 30	3	4	13	201.3437498220389	3470.2140459678117
200819	6	Nano 30	3	4	14	197.9560477047039	3470.481142778231
200819	6	Nano 30	3	5	6	173.24724592397502	3503.3386910270906
200819	6	Nano 30	3	5	7	182.14701942112808	3477.1435645178376
200819	6	Nano 30	3	5	8	168.6633813689767	3401.8830679144753
200819	6	Nano 30	3	6	3	171.96338191545124	3394.15546040769
200819	6	Nano 30	3	6	4	172.24468514792218	3396.090511866274
200819	6	Nano 30	3	6	5	191.84296292036208	3398.329399863249
200819	6	Nano 30	3	6	6	184.07864998324985	3396.15003848614
200819	6	Nano 30	3	6	7	161.47205253279336	3418.535579796381
200819	6	Nano 30	3	6	8	166.9841926122885	3429.456919541627
200819	6	Nano 30	3	6	9	182.33655337555092	3397.2829218602324
200819	6	Nano 30	3	6	10	163.79452327351913	3408.9293675029844
200819	6	Nano 30	3	7	7	175.02338152937597	3516.0874854871504
200819	6	Nano 30	3	7	8	182.13828474628846	3539.559790612004
200819	6	Nano 30	3	7	9	175.88454697107662	3512.7169084062652
200819	6	Nano 30	3	7	10	183.89086250510783	3469.905014972669
200819	6	Nano 30	3	7	11	177.31090112679283	3470.3641466331
200819	6	Nano 30	3	7	12	173.69463495154721	3475.654570756712
200819	6	Nano 30	3	7	13	175.83526372199344	3455.9258854474488
200819	6	Nano 30	3	7	14	171.40874254404366	3466.7253492779478
200819	6	Nano 30	3	7	15	192.3029623575843	3464.2337620737376
200819	6	Nano 30	3	8	2	169.72643163612656	3421.224484538523
200819	6	Nano 30	3	8	3	177.53239229157023	3423.522210747802
200819	6	Nano 30	3	9	2	168.79842727717315	3502.533238760345
200819	6	Nano 30	3	9	3	174.9816227284215	3536.937490780432
200819	6	Nano 30	3	9	4	184.417681745946	3573.319609500639
200819	6	Nano 30	3	9	5	177.9039417271777	3575.8756118296806
200819	6	Nano 30	3	9	6	175.68497187010738	3574.7327531805645
200819	6	Nano 30	3	9	7	185.02448111419227	3569.888163233153
200819	6	Nano 30	3	10	3	178.83487999132328	3537.4367665317523
200819	6	Nano 30	3	10	4	177.2200255535178	3557.5199229568043
200819	6	Nano 30	3	10	5	169.75007969061096	3570.841093760156
200819	6	Nano 30	3	10	6	176.9829186299574	3576.248002238227
200819	6	Nano 30	3	10	7	158.92883493457677	3576.847145676053
200819	6	Nano 30	3	10	8	187.00199017155623	3569.795499255661
200819	6	Nano 30	3	10	9	179.09101537218902	3541.200756748486
200819	6	Nano 30	3	10	10	183.45875315005432	3532.551576189477
200819	6	Nano 30	3	10	11	175.1315076418081	3536.4784026488537
200819	6	Nano 30	3	10	12	176.0626810569693	3534.459841724543
200819	6	Nano 30	3	10	13	178.15994022296422	3518.091154649328
200819	6	Nano 30	3	11	5	174.91958989194416	3573.03024983243
200819	6	Nano 30	3	11	6	174.1551841108233	3575.145038490931
200819	6	Nano 30	3	11	7	179.01240169816532	3545.074701673595
200819	6	Nano 30	3	11	8	178.99334494401955	3547.1598076985297
200819	6	Nano 30	3	11	9	184.96853748023426	3540.7176122247706
200819	6	Nano 30	3	11	10	172.0914471496781	3522.012914363675
200819	6	Nano 30	3	11	11	181.52359571353318	3521.211591846981
200819	6	Nano 30	3	11	12	184.67921590504204	3508.264008198249
200819	6	Nano 30	3	11	13	183.66309687853519	3498.598631699387
200819	6	Nano 30	3	11	14	166.09548005144688	3504.7375916277174
200819	6	Nano 30	3	11	15	178.6537480120694	3494.014205745204
200819	6	Nano 30	3	11	16	174.68222491839524	3498.596206485741
200819	6	Nano 30	3	12	8	155.97034932382172	3554.3934802862236
200819	6	Nano 30	3	12	9	169.50025438834928	3577.3056073733196
200819	6	Nano 30	3	12	10	168.43656157329858	3570.9009616486965
200819	6	Nano 30	3	13	2	175.39799240018658	3489.4908800029016
200819	6	Nano 30	3	13	3	180.0801841369659	3509.7703782159497
200819	6	Nano 30	3	13	4	178.30292417527352	3536.1742966525826
200819	6	Nano 30	3	13	5	181.7720323530409	3553.229651429589
200819	6	Nano 30	3	13	6	192.60110002145728	3568.228315454876
200819	6	Nano 30	3	14	2	177.25641263248616	3582.4200446840296
200819	6	Nano 30	3	14	3	172.2868927451729	3577.017886281666
200819	6	Nano 30	3	14	4	180.9775155804729	3570.156524797095
200819	6	Nano 30	3	14	5	176.9054030361903	3575.7605728475896
200819	6	Nano 30	3	15	2	183.00109395785893	3590.1657547675713
200819	6	Nano 30	3	15	3	178.86110737631668	3599.6228306286407
200819	6	Nano 30	3	15	4	182.9870147336048	3615.0946678649652
200819	6	Nano 30	3	15	5	175.7021417693444	3630.608898695405
200819	6	Nano 30	3	16	2	183.19226346691968	3543.222620454148
200819	6	Nano 30	3	16	3	178.8547236639635	3526.5314893049567
200819	6	Nano 30	3	16	4	181.12125085454738	3551.856384689912
200819	6	Nano 30	3	16	5	176.50252639048645	3555.97916388806
200819	6	Nano 30	3	16	6	178.74978467435486	3549.8952105590806
200819	6	Nano 30	3	16	7	181.36080293780049	3559.7883922762794
200819	6	Nano 30	3	19	2	168.75325863148913	3501.31459743921
200819	6	Nano 30	3	19	3	178.32094960027825	3513.4334734217027
200820	7	Nano 29	1	1	3	222.78740584874103	3732.981961450541
200820	7	Nano 29	1	1	4	220.97081477740002	3770.2670801727754
200820	7	Nano 29	1	2	8	216.09539984913087	3663.1964407088813
200820	7	Nano 29	1	2	9	218.196106088655	3670.8420620108473
200820	7	Nano 29	1	2	10	231.7132165599884	3682.9570903940735
200820	7	Nano 29	1	3	6	228.85542435019943	3645.2114956693463
200820	7	Nano 29	1	3	7	236.3989802349343	3646.564137135088
200820	7	Nano 29	1	3	8	221.6572978123554	3674.209472403727
200820	7	Nano 29	1	3	9	225.90368200865157	3685.834294175917
200820	7	Nano 29	1	3	10	220.04012065527263	3683.7054167560386
200820	7	Nano 29	1	3	11	240.8196521189535	3696.257474469114
200820	7	Nano 29	1	3	12	234.53013975132416	3726.240877625548
200820	7	Nano 29	1	3	13	227.41332343108863	3713.340259491552
200820	7	Nano 29	1	3	14	229.32517597912124	3711.597058850895
200820	7	Nano 29	1	4	5	225.79763928955558	3662.5541493663127
200820	7	Nano 29	1	4	6	235.7212309219276	3698.071871838892
200820	7	Nano 29	1	4	7	222.17694155596212	3752.204052245104
200820	7	Nano 29	1	4	8	229.8551892916507	3758.19244840813
200820	7	Nano 29	1	4	9	232.0938513942312	3732.2691379392763
200820	7	Nano 29	1	4	10	215.68070055142186	3722.151228630677
200820	7	Nano 29	1	4	11	212.7518195905504	3739.6721802416246
200820	7	Nano 29	1	4	12	226.69350444729787	3731.979310226161
200820	7	Nano 29	1	4	13	224.07129132261448	3721.015622472878
200820	7	Nano 29	1	5	5	217.86269197400017	3674.276018233413
200820	7	Nano 29	1	5	6	227.22433347092502	3660.4488075630347
200820	7	Nano 29	1	5	7	238.94151475326882	3685.791890405269
200820	7	Nano 29	1	5	8	216.55451654641013	3700.7260523885607
200820	7	Nano 29	1	5	9	239.4729021184085	3718.302566824704
200820	7	Nano 29	1	5	10	227.24651818790002	3730.282654966609
200820	7	Nano 29	1	6	5	220.525364445688	3673.1567531862047
200820	7	Nano 29	1	6	6	211.820996571058	3697.0191831357024
200820	7	Nano 29	1	6	7	222.7204670159847	3704.197866884694
200820	7	Nano 29	1	6	8	232.09943658757481	3731.2927101050564
200820	7	Nano 29	1	6	9	222.20228509271183	3742.0100960746317
200820	7	Nano 29	1	6	10	218.29451495093338	3740.506476100293
200820	7	Nano 29	1	7	2	228.00421594776833	3675.798459885702
200820	7	Nano 29	1	7	3	207.1537195792532	3678.6788499187774
200820	7	Nano 29	1	7	4	230.9102928240641	3671.5621777172655
200820	7	Nano 29	1	7	5	208.7866238512904	3654.112268026065
200820	7	Nano 29	1	7	6	225.24909350935872	3666.254339517214
200820	7	Nano 29	1	7	7	211.60197853931263	3727.524704906388
200820	7	Nano 29	1	7	8	220.73091136482788	3742.743063103868
200820	7	Nano 29	1	7	9	220.2386877127989	3712.6120404452026
200820	7	Nano 29	1	7	10	214.92128309602487	3704.775740949848
200820	7	Nano 29	1	7	11	220.8941246487251	3702.642951960536
200820	7	Nano 29	1	7	12	226.2868143895577	3728.577736593663
200820	7	Nano 29	1	7	13	232.9031263108561	3717.9802196614787
200820	7	Nano 29	1	8	2	224.3210971974108	3679.056918509114
200820	7	Nano 29	1	8	3	223.14408388054028	3674.8598778629153
200820	7	Nano 29	1	8	4	232.87235271560348	3696.049156053637
200820	7	Nano 29	1	8	5	234.5655614772528	3675.7341674473278
200820	7	Nano 29	1	8	6	233.93047003861312	3646.574940664232
200820	7	Nano 29	1	8	7	209.1752507014101	3676.859471953424
200820	7	Nano 29	1	8	8	232.4667306337133	3720.374168532804
200820	7	Nano 29	1	8	9	231.51793782527562	3732.9400669223523
200820	7	Nano 29	1	8	10	211.04494738498488	3709.7283378356224
200820	7	Nano 29	1	9	7	228.48156340010604	3626.839049985409
200820	7	Nano 29	1	9	8	225.9176585261315	3627.093752734279
200820	7	Nano 29	1	9	9	222.54598992058246	3672.885567580336
200820	7	Nano 29	1	9	10	222.5619019029446	3717.2439601760093
200820	7	Nano 29	1	9	11	216.2776321832053	3678.7821187319378
200820	7	Nano 29	1	10	2	214.15480683594063	3672.907515877571
200820	7	Nano 29	1	10	3	226.8165782396219	3684.987332544521
200820	7	Nano 29	1	10	4	216.71538177982958	3678.988774056372
200820	7	Nano 29	1	10	5	225.57172336906262	3687.336182004544
200820	7	Nano 29	1	10	6	238.3276740543937	3658.655872753129
200820	7	Nano 29	1	10	7	218.3551533424909	3652.960545944035
200820	7	Nano 29	1	10	8	221.70150183718727	3671.185754024625
200820	7	Nano 29	1	10	9	229.46011067048119	3680.694080866144
200820	7	Nano 29	1	10	10	218.29023752761657	3679.8378051346253
200820	7	Nano 29	1	10	11	231.6554860760686	3653.6294120093016
200820	7	Nano 29	1	10	12	232.3454381263696	3639.8433933548818
200820	7	Nano 29	1	11	3	229.26490446537812	3719.2587795237987
200820	7	Nano 29	1	11	4	208.23669674543999	3696.8305836921913
200820	7	Nano 29	1	11	5	227.99068777568425	3662.8499568695092
200820	7	Nano 29	1	11	6	213.14918024724307	3687.4160190684206
200820	7	Nano 29	1	11	7	210.10771081824143	3693.460953012284
200820	7	Nano 29	1	11	8	214.01268684908985	3693.7080010131135
200820	7	Nano 29	1	11	9	214.4251250994176	3702.698433485187
200820	7	Nano 29	1	11	10	215.86296494641832	3708.643818203045
200820	7	Nano 29	1	11	11	219.02026836141945	3711.9045926790063
200820	7	Nano 29	1	11	12	230.19034896559617	3695.859173240589
200820	7	Nano 29	1	11	13	216.28287114116856	3703.627626490721
200820	7	Nano 29	1	11	14	223.8994768120148	3694.991439994953
200820	7	Nano 29	1	11	15	212.8377334552147	3672.671588587144
200820	7	Nano 29	1	11	16	212.66877172238307	3705.5209501629247
200820	7	Nano 29	1	11	17	208.80079970473045	3695.935073527981
200820	7	Nano 29	1	12	7	219.46574038243256	3592.634698637899
200820	7	Nano 29	1	12	8	205.5490907473328	3613.567127622433
200820	7	Nano 29	1	12	9	215.3275589205097	3590.821219320142
200820	7	Nano 29	1	12	10	219.50027161818127	3588.860587224989
200820	7	Nano 29	1	12	11	213.52501807821625	3580.2797245777233
200820	7	Nano 29	1	12	12	206.48091408358937	3562.2132955813768
200820	7	Nano 29	1	12	13	206.38407441378087	3583.956082510208
200820	7	Nano 29	1	12	14	210.7538514780549	3613.6436790484613
200820	7	Nano 29	1	13	2	220.77729632541957	3653.568521205304
200820	7	Nano 29	1	13	3	218.41478149510704	3628.6845162397053
200820	7	Nano 29	1	13	4	220.01735887528545	3609.751274784296
200820	7	Nano 29	1	13	5	228.4722318770797	3650.777082754211
200820	7	Nano 29	1	13	6	217.75322303825104	3682.6199473308693
200820	7	Nano 29	1	14	2	217.4898046571231	3599.5248556741053
200820	7	Nano 29	1	14	3	221.48484048509124	3587.4841568834413
200820	7	Nano 29	1	14	4	224.2612449430761	3595.515047987269
200820	7	Nano 29	1	14	5	222.48437273430085	3603.388253044337
200820	7	Nano 29	1	14	6	214.93789166387901	3599.2928335424153
200820	7	Nano 29	1	14	7	203.83833723331009	3625.790566106345
200820	7	Nano 29	1	14	8	223.14986610469163	3638.0537833017133
200820	7	Nano 29	1	14	9	224.07490981858103	3622.9928318137236
200820	7	Nano 29	1	14	10	222.01820290271598	3675.9657900005873
200820	7	Nano 29	1	14	11	212.97170320598184	3724.1791317119014
200820	7	Nano 29	1	14	12	228.46029817756573	3676.8325583448373
200820	7	Nano 29	1	14	13	222.59717757087685	3624.518503747717
200820	7	Nano 29	1	14	14	226.04664181279247	3609.932586697876
200820	7	Nano 29	1	14	15	228.30047822447509	3623.8148979622947
200820	7	Nano 29	1	14	16	222.23392992137008	3634.524990157925
200820	7	Nano 29	1	15	2	220.5225295160584	3590.851399525077
200820	7	Nano 29	1	15	3	214.61749184673081	3587.036653545417
200820	7	Nano 29	1	15	4	209.94913518526843	3547.4204207939056
200820	7	Nano 29	1	15	5	220.25183027433744	3543.0818750660687
200820	7	Nano 29	1	16	2	223.75160398338159	3537.319280657169
200820	7	Nano 29	1	16	3	219.98296701565394	3534.3778893158456
200820	7	Nano 29	1	16	4	218.8779859012928	3554.362906130112
200820	7	Nano 29	1	16	5	221.50742776723462	3532.055143214242
200820	7	Nano 29	1	16	6	218.4399677771211	3532.60219097879
200820	7	Nano 29	1	16	7	224.98867185385086	3590.447214484682
200820	7	Nano 29	1	16	8	220.51066724182306	3612.37131743068
200820	7	Nano 29	1	16	9	226.13973358357015	3604.1971459907013
200820	7	Nano 29	1	16	10	222.69152549753102	3628.2906302533215
200820	7	Nano 29	1	16	11	213.362773388692	3662.701058867167
200820	7	Nano 29	1	16	12	227.18328906627733	3642.309879991325
200820	7	Nano 29	1	16	13	214.76206021891244	3600.2415936340813
200820	7	Nano 29	1	17	7	221.11670034844195	3588.0729157940664
200820	7	Nano 29	1	17	8	211.7925011253584	3644.944258411308
200820	7	Nano 29	1	17	9	211.75507912985242	3651.302733983083
200820	7	Nano 29	1	17	10	216.5291283975418	3650.778755669445
200820	7	Nano 29	1	17	11	220.1650372284314	3666.5262606799047
200820	7	Nano 29	1	17	12	207.84221233639187	3683.7141550932674
200820	7	Nano 29	1	17	13	216.32104119068921	3643.353244298669
200820	7	Nano 29	1	17	14	214.05843188308208	3580.008653942916
200820	7	Nano 29	1	17	15	220.58749121436162	3559.1187545536945
200820	7	Nano 29	1	17	16	223.3881352386419	3581.822961887385
200820	7	Nano 29	1	17	17	212.48645412064602	3575.157799229044
200820	7	Nano 29	1	18	2	219.1482365529297	3606.922072199918
200820	7	Nano 29	1	18	3	216.2361355183017	3600.0284781745722
200820	7	Nano 29	1	18	4	213.3573701422337	3586.1677803883103
200820	7	Nano 29	1	18	5	214.37086314644299	3568.762741104769
200820	7	Nano 29	1	18	6	222.37946133314185	3558.260043359702
200820	7	Nano 29	1	18	7	216.14330032564223	3574.8827377304297
200820	7	Nano 29	1	18	8	215.16080081959475	3638.7720414823852
200820	7	Nano 29	1	18	9	218.18984519466167	3646.362544160552
200820	7	Nano 29	1	18	10	218.04853916361594	3642.1931663324763
200820	7	Nano 29	1	20	5	219.85802780625176	3650.220270179492
200820	7	Nano 29	1	20	6	207.61100672532365	3668.3144704269207
200820	7	Nano 29	1	20	7	225.8023972585045	3707.517735623258
200820	7	Nano 29	1	20	8	215.9255012775341	3710.9239966018717
200820	7	Nano 29	1	21	2	219.5219065342649	3618.719741292601
200820	7	Nano 29	1	21	3	211.79485400831825	3611.2017389295006
200820	7	Nano 29	1	21	4	217.4586130781303	3610.253913785048
200820	7	Nano 29	1	21	5	226.956047362546	3650.681153193797
200820	7	Nano 29	1	21	6	206.8611030545153	3675.3716742374463
200820	7	Nano 29	1	21	7	220.44034895072602	3665.7992270189375
200820	7	Nano 29	1	21	8	218.50003335524207	3651.0678395571226
200820	7	Nano 29	1	21	9	235.41973604948532	3632.180912151036
200820	7	Nano 29	1	21	10	232.50026482018433	3617.9945536464393
200820	7	Nano 29	1	21	11	229.7365214911628	3615.1410914962676
200820	7	Nano 29	1	21	12	221.6100393637646	3628.0255105261767
200820	7	Nano 29	1	22	4	212.6661266052018	3555.296916424753
200820	7	Nano 29	1	22	5	211.49565479620412	3575.247477126413
200820	7	Nano 29	1	22	6	210.24913816529812	3579.831040433981
200820	7	Nano 29	1	22	7	232.69195478476175	3598.646325406038
200820	7	Nano 29	1	23	2	205.84283334382042	3579.3208798484143
200820	7	Nano 29	1	23	3	204.86834265959538	3570.132672423131
200820	7	Nano 29	1	23	4	228.53437165428392	3580.9504721430158
200820	7	Nano 29	1	23	5	221.23854163521102	3596.397189950873
200820	7	Nano 29	1	23	6	215.11541299826263	3623.819156288761
200820	7	Nano 29	1	23	7	216.821560163398	3614.6689700934853
200820	7	Nano 29	1	23	8	204.95234422651606	3609.581128211861
200820	7	Nano 33	1	1	10	681.4260786102581	3682.008054371844
200820	7	Nano 33	1	2	9	690.7663655434328	3673.2222111023875
200820	7	Nano 33	1	2	10	680.8359571186472	3690.2511585545867
200820	7	Nano 33	1	3	6	684.529229285726	3631.5497762630175
200820	7	Nano 33	1	3	7	663.6977427679077	3648.347068727872
200820	7	Nano 33	1	3	8	721.8952164249232	3687.602936476808
200820	7	Nano 33	1	3	9	691.1623968695067	3686.293229456264
200820	7	Nano 33	1	3	10	674.440094207605	3685.960303663075
200820	7	Nano 33	1	4	9	694.8807661611336	3733.6679678348223
200820	7	Nano 33	1	4	10	671.8978017342072	3724.781077995919
200820	7	Nano 33	1	4	11	681.2388136702174	3736.030899135609
200820	7	Nano 33	1	5	6	672.9158464414559	3661.781501632589
200820	7	Nano 33	1	7	7	699.4328986212113	3729.159899253612
200820	7	Nano 33	1	7	8	696.6447818422699	3749.701225883709
200820	7	Nano 33	1	7	9	669.8211391529145	3713.2059786733944
200820	7	Nano 33	1	11	11	680.741846315737	3711.9652715984334
200820	7	Nano 33	1	11	12	654.0366996689828	3699.1627848327466
200820	7	Nano 33	1	11	13	681.4659455679018	3697.316272918827
200820	7	Nano 33	1	11	14	675.4680952183908	3689.6161273366797
200820	7	Nano 33	1	12	6	668.3280385311092	3588.5268062584623
200820	7	Nano 33	1	13	2	686.2393055383641	3660.69286585734
200820	7	Nano 33	1	13	3	671.3633992770866	3625.4830636176644
200820	7	Nano 33	1	14	5	686.9801160676218	3616.8231547385412
200820	7	Nano 33	1	17	7	666.6138886340318	3589.450009111887
200820	7	Nano 33	1	21	7	688.6941210392104	3675.635293371305
200820	7	Nano 29	3	3	8	231.31502509111215	3506.7224145997748
200820	7	Nano 29	3	3	9	222.6038970514071	3537.377862441192
200820	7	Nano 29	3	6	2	243.71914462923485	3520.7398847667723
200820	7	Nano 29	3	8	2	220.3295201909736	3444.7011690412846
200820	7	Nano 29	3	8	3	213.8793623875705	3455.340113201953
200820	7	Nano 29	3	8	4	228.3647482596547	3457.1544377795417
200820	7	Nano 29	3	8	5	226.47987345583888	3482.9494164643056
200820	7	Nano 29	3	8	6	219.84991477132786	3482.331369226221
200820	7	Nano 29	3	8	7	228.4351379875605	3501.597341192139
200820	7	Nano 29	3	11	12	227.1625202092548	3503.361328711581
200820	7	Nano 29	3	12	9	210.79134124713448	3350.0503005059322
200820	7	Nano 29	3	12	10	219.31363203949783	3290.4325488219642
200820	7	Nano 33	3	8	5	705.0841173244249	3444.5515057850557
200820	8	Nano 29	1	3	8	230.01956957245625	3676.647310256658
200820	8	Nano 29	1	6	13	241.1930685517575	3724.309070652329
200820	8	Nano 29	1	6	14	235.6970687021419	3721.927615286545
200820	8	Nano 29	1	8	2	234.34131931853926	3633.4175330712687
200820	8	Nano 29	1	8	3	200.57983001544488	3647.0210720930013
200820	8	Nano 29	1	8	4	240.90419552744962	3661.184042422568
200820	8	Nano 29	1	10	14	239.44094251970512	3681.5125095670833
200820	8	Nano 29	1	12	4	252.48116274948632	3691.471636161848
200820	8	Nano 29	1	12	5	230.51831571140625	3690.5006525503973
200820	8	Nano 29	1	12	6	236.1235571458872	3645.555061741143
200820	8	Nano 29	1	13	8	222.11347471617245	3537.079660979151
200820	8	Nano 29	1	14	4	229.90708495795326	3673.2981815921753
200820	8	Nano 29	1	14	5	210.75670264283173	3625.5342967775873
200820	8	Nano 29	1	14	6	215.22072193492556	3592.0593604712262
200820	8	Nano 29	1	15	5	234.5305144236987	3628.3147537370173
200820	8	Nano 29	1	15	6	237.3842959418204	3644.050193694724
200820	8	Nano 29	1	15	7	237.27592671767863	3662.4736281274327
200820	8	Nano 29	1	15	8	239.37349140716748	3686.3636994023527
200820	8	Nano 29	1	17	8	237.3095748171593	3545.646382624246
200820	8	Nano 29	1	19	7	230.91518248654185	3606.537246693149
200820	8	Nano 29	1	19	8	229.5208882276546	3610.290572863396
200820	8	Nano 29	1	19	9	219.0367552795536	3589.4190089141166
200820	8	Nano 29	1	19	10	233.32876950512542	3580.603281333686
200820	8	Nano 29	1	19	11	233.61183030511654	3611.7891396155255
200820	8	Nano 29	2	14	7	232.92372884460264	3383.159529749112
200820	8	Nano 29	2	14	8	242.79013433246035	3416.6231216283045
200820	8	Nano 29	3	5	2	223.8999327189724	3705.7543723891863
200820	8	Nano 29	3	5	3	236.75979544318352	3722.301615584615
200820	8	Nano 29	3	5	4	218.9665901057193	3731.9679401148132
200820	8	Nano 29	3	8	2	220.03125637338425	3739.924094727049
200820	8	Nano 29	3	8	3	229.9952221886768	3744.6620777176477
200820	8	Nano 29	3	10	2	231.20617748398342	3668.520905511104
200820	8	Nano 29	3	11	3	235.03222539182445	3747.930286058811
200820	8	Nano 29	3	11	4	225.50352626971542	3779.0663326144872
200820	8	Nano 29	3	11	5	229.53293456788842	3827.310134914865
200820	8	Nano 29	3	16	3	221.8781249361625	3793.140218403576
200820	8	Nano 29	3	18	6	232.86822900361219	3883.3679190993066
200820	8	Nano 29	3	19	5	233.44650559456127	3771.732285625221
200820	8	Nano 29	3	19	6	242.90478166755435	3791.028593362258
200821	9	Nano 39	1	1	5	200.7222832683945	3640.226355691059
200821	9	Nano 39	1	2	4	193.00206470239388	3732.562659556507
200821	9	Nano 39	1	2	5	189.39941516857388	3727.3584594734734
200821	9	Nano 39	1	2	6	189.7985808629372	3734.0065028150148
200821	9	Nano 39	1	2	7	184.02856631332585	3727.6361809548243
200821	9	Nano 39	1	2	8	188.4616394664897	3736.8048239927534
200821	9	Nano 39	1	2	9	183.57470132900173	3774.3922132738503
200821	9	Nano 39	1	3	8	193.1237677322295	3761.610970948832
200821	9	Nano 39	1	3	9	195.9270153958107	3748.721957139898
200821	9	Nano 39	1	3	10	188.23687931831046	3715.210539105564
200821	9	Nano 39	1	3	11	193.21119691475812	3735.9009996296004
200821	9	Nano 39	1	4	8	203.58822956980396	3748.099646099585
200821	9	Nano 39	1	4	9	200.37361914072483	3768.3891686771785
200821	9	Nano 39	1	4	10	201.48331241278754	3765.6619088154707
200821	9	Nano 39	1	5	2	188.9978746352481	3780.1697538417407
200821	9	Nano 39	1	5	3	208.6778386926437	3743.395587160117
200821	9	Nano 39	1	5	4	203.8226204131373	3729.8030027457344
200821	9	Nano 39	1	8	3	191.84217202415408	3758.1387978128932
200821	9	Nano 39	1	8	4	206.9643897222636	3762.1360017979937
200821	9	Nano 39	1	8	5	209.3582030432508	3754.485720526202
200821	9	Nano 39	1	8	6	199.98580767251067	3756.8519329233977
200821	9	Nano 39	1	9	2	194.00126862429957	3794.0643434616463
200821	9	Nano 39	1	9	3	191.41709122685643	3815.0486325097772
200821	9	Nano 39	1	13	2	202.3034012786604	3613.2723159754164
200821	9	Nano 39	1	13	3	204.1331590579088	3608.9252179799323
200821	9	Nano 39	1	13	4	207.81796724883225	3628.16461356661
200821	9	Nano 39	1	14	2	209.3372473715541	3697.964947645023
200821	9	Nano 39	1	14	3	192.06855226929645	3666.045661947949
200821	9	Nano 29	1	2	7	218.4367140082037	3728.443700154174
200821	9	Nano 29	1	4	7	244.06688879902845	3726.900488367693
200821	9	Nano 29	1	11	6	226.8086755844624	3767.566164494263
200821	9	Nano 29	1	12	6	249.12230052109265	3791.148872145924
200821	9	Nano 29	1	13	2	223.91652765972717	3610.5959426617987
200821	9	Nano 29	1	13	3	241.366208634673	3620.3157833956666
200821	9	Nano 29	1	13	4	234.6198922131414	3645.207481921968
200821	9	Nano 29	1	13	5	246.7085268847403	3661.953577205448
200821	9	Nano 39	2	1	4	199.21989089199315	3729.02243291368
200821	9	Nano 39	2	1	5	205.5458822574771	3727.48590784927
200821	9	Nano 39	2	1	6	192.94143563648817	3737.2831293172526
200821	9	Nano 39	2	1	7	185.39864377492992	3730.889642723756
200821	9	Nano 39	2	1	8	193.11994323446098	3740.3803438135865
200821	9	Nano 39	2	1	9	173.0721201901719	3780.900780074665
200821	9	Nano 39	2	3	3	202.93761822439342	3735.991599669851
200821	9	Nano 39	2	7	3	185.9848054166507	3745.192960391735
200821	9	Nano 39	2	7	4	201.7505547776973	3738.1557149312384
200821	9	Nano 39	2	7	5	206.02533381780688	3746.225892611712
200821	9	Nano 39	2	7	6	204.7829031336525	3764.043507946221
200821	9	Nano 39	2	7	7	193.11387770972766	3758.770919769551
200821	9	Nano 39	2	9	2	206.05391988024638	3681.7184809246196
200821	9	Nano 39	2	12	2	200.5193901136556	3768.202731156394
200821	9	Nano 39	2	14	5	213.31905249846145	3664.610387126587
200821	9	Nano 39	2	15	2	191.31365137162624	3665.650390761228
200821	9	Nano 29	2	7	5	236.52946169318628	3760.030193459914
200821	9	Nano 29	2	7	6	234.44268660087917	3770.567428725813
200821	9	Nano 29	2	7	7	233.3353952373193	3771.085966044897
200821	9	Nano 29	2	14	3	248.12751393798385	3613.832892652518
200821	9	Nano 29	2	14	4	235.6740805330645	3643.7921028646174
200821	9	Nano 29	2	15	2	232.59702909244442	3666.3334297402544
200821	14	Nano 42	1	3	6	177.7390815184293	3580.85027847016
200821	14	Nano 42	1	3	7	190.7388185900203	3576.472474443443
200821	14	Nano 42	1	3	8	180.86809969632068	3550.647267314
200821	14	Nano 42	1	3	9	183.4534377632042	3543.1834451149384
200821	14	Nano 42	1	3	10	183.3385554790129	3542.92351266994
200821	14	Nano 42	1	3	11	190.85947637400352	3547.013041048828
200821	14	Nano 42	1	3	12	185.1302944322123	3540.3760128026006
200821	14	Nano 42	1	3	13	194.26673050953133	3522.1946124565306
200821	14	Nano 42	1	3	14	181.0662727071088	3550.2168167434747
200821	14	Nano 42	1	3	15	190.21388210959236	3556.8528897614283
200821	14	Nano 42	1	4	9	180.972510411913	3616.319682237294
200821	14	Nano 42	1	4	10	175.4268526605867	3583.1886021996315
200821	14	Nano 42	1	4	11	185.85890622254112	3561.9119037945675
200821	14	Nano 42	1	4	12	172.34416621455296	3547.666273596849
200821	14	Nano 42	1	7	6	176.9795449326972	3555.8378830961883
200821	14	Nano 42	1	7	7	191.23675395227247	3568.1863585558003
200821	14	Nano 42	1	7	8	179.96715366167564	3537.304868996509
200821	14	Nano 42	1	10	15	168.5826887251079	3526.1371112954266
200821	14	Nano 42	1	10	16	202.19832276394808	3529.0598367284038
200821	14	Nano 42	1	11	12	188.5415215301458	3503.1700744930213
200821	14	Nano 42	1	12	11	193.56774411603	3569.1530759581233
200821	14	Nano 42	1	12	12	189.60376675602103	3555.9391254015973
200821	14	Nano 42	1	12	13	186.56909746464692	3546.5642534846725
200821	14	Nano 42	1	12	14	176.79475143980142	3539.123616560636
200821	14	Nano 42	1	19	2	195.35788431247497	3547.5145789208755
200821	14	Nano 42	1	19	3	181.0993685773677	3556.2642346214293
200821	14	Nano 42	1	19	4	180.16576664219542	3535.038712819379
200821	14	Nano 42	1	19	5	171.33656329237184	3517.196030857557
200821	14	Nano 42	1	19	6	184.81555586150702	3518.8380749265275
200821	14	Nano 42	1	19	7	173.62468842087426	3529.673083555973
200821	14	Nano 30	1	1	5	165.32058401634785	3507.2707534224687
200821	14	Nano 30	1	2	6	164.36492867329804	3545.7035305882764
200821	14	Nano 30	1	2	7	179.21934570523658	3550.5453764875483
200821	14	Nano 30	1	2	8	162.10313353869338	3528.466802877355
200821	14	Nano 30	1	2	9	150.36134755029622	3516.575020134125
200821	14	Nano 30	1	2	10	161.3720995472477	3527.9618722122414
200821	14	Nano 30	1	2	11	157.73062863278994	3514.701034907279
200821	14	Nano 30	1	2	12	160.86580050036102	3530.2191619477508
200821	14	Nano 30	1	2	13	161.548724475291	3538.3988312262645
200821	14	Nano 30	1	3	7	165.87715342080003	3580.661773547949
200821	14	Nano 30	1	3	8	164.2689103716262	3558.954722543224
200821	14	Nano 30	1	3	9	169.7362914005805	3546.418911666729
200821	14	Nano 30	1	3	10	159.80224555972256	3542.3831024313845
200821	14	Nano 30	1	3	11	175.67192682375438	3546.1873473000132
200821	14	Nano 30	1	3	12	173.92795031924152	3547.296844108194
200821	14	Nano 30	1	4	10	166.49537294758002	3584.5470803621693
200821	14	Nano 30	1	4	11	173.23773093170414	3564.335267724131
200821	14	Nano 30	1	4	12	183.40130679778267	3559.2683590367187
200821	14	Nano 30	1	4	13	164.0013549220737	3575.5471536169957
200821	14	Nano 30	1	4	14	174.21366775058289	3592.0393421718572
200821	14	Nano 30	1	5	6	172.43706419193813	3548.5744756126146
200821	14	Nano 30	1	5	7	168.51976025806806	3567.4121311205745
200821	14	Nano 30	1	6	4	164.89754285311022	3537.2196777692384
200821	14	Nano 30	1	6	5	168.09027757350947	3571.9768082728033
200821	14	Nano 30	1	6	6	161.54099964942844	3599.049708218157
200821	14	Nano 30	1	6	7	164.5057909030666	3583.2585615512844
200821	14	Nano 30	1	6	8	173.2336579763097	3546.1790838052266
200821	14	Nano 30	1	6	9	162.8645626615884	3528.0745040388397
200821	14	Nano 30	1	6	10	184.14268228674305	3562.763162292193
200821	14	Nano 30	1	6	11	171.25193190029336	3561.391662200246
200821	14	Nano 30	1	6	12	182.489872883528	3530.308337099527
200821	14	Nano 30	1	6	13	174.0921807319944	3573.911317349142
200821	14	Nano 30	1	6	14	156.06892429482514	3607.626754639977
200821	14	Nano 30	1	6	15	176.17818920381637	3600.6640429423524
200821	14	Nano 30	1	7	6	171.29846291148257	3560.222898158885
200821	14	Nano 30	1	7	7	172.29325359546348	3562.553964047583
200821	14	Nano 30	1	7	8	159.8580715937149	3540.204837265011
200821	14	Nano 30	1	7	9	160.25503673981405	3554.2942575125594
200821	14	Nano 30	1	7	10	158.94398015888072	3556.0344906452165
200821	14	Nano 30	1	7	11	181.07649537239013	3533.0043358701705
200821	14	Nano 30	1	7	12	174.88196828362675	3570.477306554816
200821	14	Nano 30	1	7	13	171.67995502457813	3584.8463099263
200821	14	Nano 30	1	8	2	169.82913767678195	3601.97200562562
200821	14	Nano 30	1	8	3	163.5160805108487	3571.686808404881
200821	14	Nano 30	1	8	4	169.31216131960994	3558.629638571683
200821	14	Nano 30	1	8	5	161.73197042647732	3581.797263122882
200821	14	Nano 30	1	8	6	160.12755553347804	3582.116065494413
200821	14	Nano 30	1	8	7	173.90607195372212	3573.531761914704
200821	14	Nano 30	1	9	2	165.02796197851964	3586.632063011828
200821	14	Nano 30	1	9	3	161.7674963787436	3577.9994516635584
200821	14	Nano 30	1	16	9	167.25262302730528	3612.387466877727
200821	14	Nano 30	1	16	10	183.886998211924	3620.897893352312
200821	14	Nano 30	1	17	4	175.59035427266124	3518.6038546319523
200821	14	Nano 30	1	17	5	159.36225412061972	3494.1401497328075
200821	14	Nano 30	1	17	6	158.20519653950925	3501.8870312166723
200821	14	Nano 30	1	17	7	162.8574560798393	3508.4994982015874
200821	14	Nano 30	1	19	4	174.338524821072	3539.343722518304
200821	14	Nano 30	1	19	5	161.2078742807023	3523.4986727811915
200821	14	Nano 30	1	19	6	156.17159920926497	3515.0884894108613
200821	14	Nano 30	1	19	7	182.68322974701215	3533.6672397066063
200821	14	Nano 30	1	21	2	179.8019379932174	3499.7716163769533
200821	14	Nano 30	1	21	3	178.8128168749392	3501.5194301869483
200821	14	Nano 30	1	21	4	203.03387920279079	3589.768255965666
200821	14	Nano 30	1	21	5	184.45765401911243	3598.484004538215
200821	14	Nano 42	2	3	5	221.67124345771683	3715.476184921031
200821	14	Nano 42	2	3	6	209.07823448802617	3703.8926171508588
200821	14	Nano 42	2	5	7	216.9222943417117	3598.7702224289783
200821	14	Nano 42	2	7	5	208.61916928269463	3624.364631385536
200821	14	Nano 42	2	8	5	199.55869294150799	3554.108802435821
200821	14	Nano 42	2	8	6	211.77309165620784	3556.0409182324584
200821	14	Nano 42	2	8	7	218.6927921883941	3543.788848235604
200821	14	Nano 42	2	13	4	192.43757815251985	3709.646840842615
200821	14	Nano 42	2	13	5	203.1626229843043	3701.7402102498736
200821	14	Nano 42	2	15	4	202.97704336759185	3645.53246141017
200821	14	Nano 42	2	18	3	209.4135238274144	3616.289921910327
200821	14	Nano 42	2	21	4	214.99409796153896	3542.5164677642188
200821	14	Nano 30	2	2	4	185.87896451539348	3704.832420311497
200821	14	Nano 30	2	3	4	195.20913071992027	3695.6468239710093
200821	14	Nano 30	2	4	3	179.83264923602638	3610.3725899941137
200821	14	Nano 30	2	5	3	200.44699485107373	3604.011423901331
200821	14	Nano 30	2	5	4	197.92780353509613	3577.8786028194386
200821	14	Nano 30	2	5	5	193.36381893239792	3581.5994102043896
200821	14	Nano 30	2	6	2	187.5894420951897	3679.0503178492095
200821	14	Nano 30	2	6	3	179.33447136686078	3654.4231700545092
200821	14	Nano 30	2	6	4	182.93185924921443	3652.862095240268
200821	14	Nano 30	2	7	2	186.30920958186283	3647.335960202127
200821	14	Nano 30	2	7	3	208.1719346013607	3658.9072547001288
200821	14	Nano 30	2	7	4	172.76887953555075	3634.3536060199876
200821	14	Nano 30	2	7	5	193.23680187702323	3619.253083326233
200821	14	Nano 30	2	8	2	191.53410848921013	3564.698701796397
200821	14	Nano 30	2	8	3	201.1476334326636	3546.42547844525
200821	14	Nano 30	2	8	4	169.95513778998742	3535.318370815713
200821	14	Nano 30	2	9	2	193.21869249140843	3489.812746345832
200821	14	Nano 30	2	10	2	187.24350291729615	3555.6653877640297
200821	14	Nano 30	2	10	3	181.784317198692	3538.403112204504
200821	14	Nano 30	2	10	4	190.59375270027715	3558.9366154129984
200821	14	Nano 30	2	10	5	195.8082819059708	3548.8474668573012
200821	14	Nano 30	2	11	2	206.84195516263938	3586.472486367194
200821	14	Nano 30	2	12	2	199.0318793760489	3667.8048163361045
200821	14	Nano 30	2	12	3	197.06553424849946	3708.629749911947
200821	14	Nano 30	2	13	2	181.78566511664602	3716.3256075973122
200821	14	Nano 30	2	14	2	196.76647032022785	3630.3928521129387
200821	14	Nano 30	2	14	3	178.36485795699943	3637.7942915604303
200821	14	Nano 30	2	14	4	186.2457865668861	3644.907696620145
200821	14	Nano 30	2	14	5	198.43360687326023	3663.2897857316193
200821	14	Nano 30	2	14	6	186.04285372651245	3653.7611412461615
200821	14	Nano 30	2	14	7	185.2716017968746	3619.4442379460193
200821	14	Nano 30	2	14	8	176.06216910960285	3610.755087526277
200821	14	Nano 30	2	15	2	186.9734154038004	3608.0897134840025
200821	14	Nano 30	2	15	3	185.15505131727815	3638.1625959582757
200821	14	Nano 30	2	15	4	180.89014589198285	3651.3236502575487
200821	14	Nano 30	2	16	2	150.2475925949419	3608.608474792076
200821	14	Nano 30	2	16	3	204.6835419814592	3604.6945258203364
200821	14	Nano 30	2	16	4	193.05338992983903	3579.5186043531703
200821	14	Nano 30	2	17	6	193.22254550258842	3484.8784815232066
200821	14	Nano 30	2	17	7	182.79981347256359	3499.8348107035276
200821	14	Nano 30	2	17	8	187.98862831566086	3492.022839552213
200821	14	Nano 30	2	18	2	182.17058208893872	3608.3564515003145
200821	14	Nano 30	2	18	3	188.45604875952455	3614.504454686552
200821	14	Nano 30	2	18	4	222.87875719942008	3585.9626992200087
200821	14	Nano 30	2	18	5	207.4620852529715	3606.326087833827
200821	14	Nano 30	2	18	6	200.47365260855457	3618.748398572026
200821	14	Nano 30	2	19	2	187.7626391401805	3614.828948428995
200821	14	Nano 30	2	19	3	196.34375129041928	3614.2395793600654
200821	14	Nano 30	2	20	2	179.44085932601104	3528.4816303313014
200821	14	Nano 30	2	20	3	182.68715566279675	3518.770347895035
200821	14	Nano 30	2	20	4	211.02159398236282	3517.761939923277
200821	14	Nano 30	2	20	5	201.1822360630696	3563.410642889898
200821	14	Nano 30	2	21	3	197.52631856560527	3540.1422336693786
200821	14	Nano 30	2	21	4	206.12283792072915	3540.0390510270295
200821	14	Nano 30	3	1	2	205.23725978947118	3726.459718052009
200821	14	Nano 30	3	1	3	210.58300923005226	3697.4585840228387
200821	14	Nano 30	3	2	3	186.57508864418102	3518.2878835648908
200821	14	Nano 30	3	2	4	224.6304401194385	3509.9109087389265
200821	14	Nano 30	3	2	5	195.88840324307012	3516.5965358917183
200821	14	Nano 30	3	2	6	189.76725183023945	3497.728415194989
200821	14	Nano 30	3	2	7	188.44939625712158	3484.29003710546
200821	14	Nano 30	3	3	7	186.6131969130816	3441.5535783227497
200821	14	Nano 30	3	3	8	192.30565090129886	3444.7728076726503
200821	14	Nano 30	3	3	9	215.02011819070447	3459.123036014343
200821	14	Nano 30	3	4	8	196.55785600201543	3540.429389924226
200821	14	Nano 30	3	4	9	198.4833347389349	3575.4437041297865
200821	14	Nano 30	3	5	3	195.2701580197964	3482.1451036863264
200821	14	Nano 30	3	5	4	194.4591332286933	3512.279403986145
200821	14	Nano 30	3	5	5	191.8616308452465	3515.282240181882
200821	14	Nano 30	3	5	6	196.0828724281356	3565.0512899241085
200821	14	Nano 30	3	7	2	194.80426637629745	3472.4636573838275
200821	14	Nano 30	3	7	3	175.78636192060858	3439.469451617769
200821	14	Nano 30	3	7	4	186.3443545785385	3432.0272038345674
200821	14	Nano 30	3	8	10	187.75489354699602	3510.736309129943
200821	14	Nano 30	3	9	11	172.26121846366826	3500.8528871712706
200821	14	Nano 30	3	9	12	205.5125430101464	3512.6110179092784
200821	14	Nano 30	3	10	2	206.87676364619912	3529.9108715651173
200821	14	Nano 30	3	10	3	237.2734111795025	3561.0597553795005
200821	14	Nano 30	3	11	12	193.03031635244446	3433.359525773856
200821	14	Nano 30	3	12	2	214.82439159176928	3487.399170886289
200821	14	Nano 30	3	13	2	192.69383726649195	3506.813721360552
200821	14	Nano 30	3	14	7	211.80486823136025	3444.0716130976066
200821	14	Nano 30	3	14	8	192.89162047136813	3452.710114883511
200821	14	Nano 30	3	14	9	194.14189264797216	3422.1215678384983
200821	14	Nano 30	3	14	10	191.4886592822549	3421.866921910219
200821	14	Nano 30	3	14	11	193.6428529691688	3425.913834467847
200821	14	Nano 30	3	15	5	197.87212403821144	3433.965250076669
200821	14	Nano 30	3	15	6	202.841139940181	3427.1218617876957
200821	14	Nano 30	3	15	7	192.63273684932528	3445.799065904643
200821	14	Nano 30	3	15	8	203.22751176915432	3443.971030072801
200821	14b	Nano 30	2	3	2	171.89358783660214	3347.1746491702547
200821	14b	Nano 30	2	3	3	166.76048400724483	3360.867412417832
200821	14b	Nano 30	2	3	4	159.08368570828316	3377.332075652819
200821	14b	Nano 30	2	3	5	176.1702871588392	3352.338981445953
200821	14b	Nano 30	2	3	6	160.34002430163554	3342.843667468236
200821	14b	Nano 30	2	4	4	162.24593002549753	3309.5912654013982
200821	14b	Nano 30	2	4	5	165.35349128864794	3340.886319573975
200821	14b	Nano 30	2	5	3	163.00991555095698	3353.876841037477
200821	14b	Nano 30	2	5	4	175.31876357516708	3355.036277404739
200821	14b	Nano 30	2	5	5	169.47553401659363	3348.7712075150016
200821	14b	Nano 30	2	5	6	168.14390753406087	3357.470973927469
200821	14b	Nano 30	2	6	2	181.44858425435828	3299.3899547783003
200821	14b	Nano 30	2	6	3	173.07409459188045	3320.459279600058
200821	14b	Nano 30	2	6	4	178.49712385899156	3339.2638697836696
200821	14b	Nano 30	2	6	5	174.09821833077908	3324.5101092668665
200821	14b	Nano 30	2	6	6	178.88422420617587	3328.829883262049
200821	14b	Nano 30	2	6	7	173.30970405463663	3341.966901004569
200821	14b	Nano 30	2	6	8	181.26345929012072	3354.9371243194273
200821	14b	Nano 30	2	6	9	178.1620444073957	3361.133130405929
200821	14b	Nano 30	2	6	10	184.18626296269886	3380.998131759841
200821	14b	Nano 30	2	6	11	164.80510692562575	3376.1471644845024
200821	14b	Nano 30	2	6	12	168.7386243427767	3355.006268726829
200821	14b	Nano 30	2	6	13	174.3129768311718	3335.87889447916
200821	14b	Nano 30	2	6	14	175.01610440456832	3360.5392218970787
200821	14b	Nano 30	2	6	15	174.65724536755772	3380.506414995563
200821	14b	Nano 30	2	6	16	186.338678258274	3361.3252113397552
200821	14b	Nano 30	2	6	17	162.1303898862692	3351.7627028850475
200821	14b	Nano 30	2	6	18	180.28382351177586	3370.297296492071
200821	14b	Nano 30	2	6	19	164.27772868274246	3387.3259271847355
200821	14b	Nano 30	2	7	3	187.72627002552508	3362.4788850592518
200821	14b	Nano 30	2	7	4	175.88771871926724	3361.2540054303668
200821	14b	Nano 30	2	7	5	178.989829460552	3353.998682609998
200821	14b	Nano 30	2	7	6	174.62781545509137	3342.721652168097
200821	14b	Nano 30	2	7	7	171.7050191477941	3361.658855187579
200821	14b	Nano 30	2	7	8	176.476848880435	3375.6401708406993
200821	14b	Nano 30	2	7	9	177.60905366615677	3384.5538699639674
200821	14b	Nano 30	2	7	10	171.310658435294	3425.95893745414
200821	14b	Nano 30	2	7	11	170.49031277658568	3425.846574327354
200821	14b	Nano 30	2	10	2	179.01713222874267	3290.4503239059823
200821	14b	Nano 30	2	11	7	184.1724469654514	3348.229991729805
200821	14b	Nano 30	2	11	8	172.7474245331297	3347.7088753837706
200821	14b	Nano 30	2	12	7	182.02021496723947	3503.5514211300074
200821	14b	Nano 30	2	12	8	173.17013146068885	3505.445678750288
200821	14b	Nano 30	2	13	5	177.9715366058633	3395.718100025031
200821	14b	Nano 30	2	13	6	189.3032948064294	3418.983076001896
200821	14b	Nano 30	2	13	7	177.4819668972939	3436.594035719225
200821	14b	Nano 30	2	13	8	179.0952902680701	3438.161184014826
200821	14b	Nano 30	2	13	9	180.7230472924201	3420.9861545906206
200821	14b	Nano 30	2	15	7	189.61987561360104	3506.0138337165276
200821	14b	Nano 30	2	15	8	164.23907175647685	3513.3567250314773
200821	14b	Nano 30	2	15	9	179.26091237650868	3496.4035990389257
200821	14b	Nano 30	2	15	10	174.08814903262657	3497.0806827122988
200821	14b	Nano 30	2	15	11	184.7598955922075	3491.585588689789
200821	14b	Nano 30	2	15	12	173.7537389260024	3476.0169390594633
200821	14b	Nano 30	2	15	13	180.79568363992507	3497.260861000376
200821	14b	Nano 30	2	17	9	189.31157296508502	3440.518611848197
200821	14b	Nano 30	2	17	10	181.03370299960685	3472.088971261466
200821	14b	Nano 30	2	17	11	185.24730116137792	3472.213937261261
200821	14b	Nano 30	2	17	12	175.17656087232467	3430.0053446800657
200821	14b	Nano 30	2	17	13	189.482385200746	3403.8687782822212
200821	14b	Nano 30	2	17	14	185.0553497500676	3432.433260769985
200821	14b	Nano 30	2	17	15	190.9766982401345	3459.968179312017
200821	14b	Nano 30	2	20	9	212.52940470984043	3625.853399418351
200821	14b	Nano 30	2	20	10	186.20266148947564	3614.350384389011
200821	14b	Nano 30	2	20	11	189.9265896259556	3617.0738663922502							number of animals
200821	14b	Nano 30	2	20	12	190.07626593479472	3605.423007449671
200821	14b	Nano 30	2	21	2	207.7090943097926	3537.289728562862
200821	14b	Nano 30	2	21	3	208.6234582949756	3536.812882299878
200821	14b	Nano 30	2	21	4	209.14301912840745	3511.013690768911
200821	14b	Nano 30	2	21	5	194.85106904557753	3528.0414529184886
200821	14b	Nano 30	2	21	6	212.1594957472936	3516.481318400471
200821	14b	Nano 30	2	21	7	198.01299764134853	3501.187136868005
200821	14b	Nano 30	2	21	8	218.61627853482585	3530.309285039953
200821	14b	Nano 30	2	21	9	200.95497066070772	3534.7344596617027
200821	14b	Nano 30	2	21	10	204.217849625135	3510.9847682645595
200821	14b	Nano 30	2	21	11	192.7471198616331	3501.4355881201172
200821	14b	Nano 30	2	21	12	195.76495315637885	3494.8772552201012
200821	14b	Nano 30	2	21	13	184.8433308934921	3524.294556085036
200821	14b	Nano 30	2	22	10	199.3670143273468	3523.688596051992
200821	14b	Nano 30	2	22	11	190.80902324204544	3540.5735173709513
200821	14b	Nano 30	2	23	3	197.58819303840056	3502.5344454248493
191029	5	Nano 2	1	1	4	115.50659049305452	3288.191548923837
191029	5	Nano 35	1	1	4	749.4305091965448	3296.138635313677
191029	5	Nano 2	1	1	5	108.5865387144574	3282.064899071499
191029	5	Nano 35	1	1	5	695.1617782272807	3277.922661670539
191029	5	Nano 2	1	1	6	110.05885802343272	3297.2311473698574
191029	5	Nano 35	1	1	6	726.6842410687027	3289.7976493888905
191029	5	Nano 2	1	1	7	126.68553142508812	3304.809734433183
191029	5	Nano 35	1	1	7	772.5365092890936	3309.6083375659277
191029	5	Nano 2	1	2	2	100.56664412835943	3411.781718070904
191029	5	Nano 35	1	2	2	743.7892314145394	3412.343227883934
191029	5	Nano 2	1	2	3	134.57002687939578	3421.336007033045
191029	5	Nano 35	1	2	3	739.1047175257986	3419.566733822269
191029	5	Nano 2	1	4	2	121.30616165713914	3404.6720596837517
191029	5	Nano 35	1	4	2	731.4160339581102	3403.824816661277
191029	5	Nano 2	1	4	3	121.61262947162008	3418.992915435603
191029	5	Nano 35	1	4	3	736.236873919401	3411.045141871479
191029	5	Nano 2	1	5	2	129.94505641942638	3376.1570361274016
191029	5	Nano 35	1	5	2	741.7836847432575	3379.673332982151
191029	5	Nano 2	1	5	3	122.17067441643186	3383.098798650449
191029	5	Nano 35	1	5	3	730.4725312018447	3384.094183766325
191029	5	Nano 2	1	10	2	105.83921619238843	3530.2450990653865
191029	5	Nano 35	1	10	2	762.3831050641272	3533.607518666073
191029	5	Nano 2	1	10	3	122.92299717505271	3560.288121055253
191029	5	Nano 35	1	10	3	754.512188944011	3560.5563178746565
191029	5	Nano 2	1	10	4	116.1602561720278	3537.7249149475533
191029	5	Nano 35	1	10	4	739.3214930160549	3530.0403484545386
191029	5	Nano 2	1	10	5	110.28487866483287	3491.1527742772937
191029	5	Nano 35	1	10	5	708.160390079348	3504.2227183452724
191029	5	Nano 2	1	10	6	102.40019954900588	3496.4248023119094
191029	5	Nano 35	1	10	6	737.0245656072908	3503.011037989917
191029	5	Nano 2	1	10	7	123.14889935993135	3503.479277635441
191029	5	Nano 35	1	10	7	739.9224728278481	3495.9387721758644
191029	5	Nano 2	1	10	8	107.50990741341894	3502.4012802906486
191029	5	Nano 35	1	10	8	658.06943519448	3500.5797600265278
191029	5	Nano 2	1	10	9	120.699324740456	3524.580723073061
191029	5	Nano 35	1	10	9	754.9341291459042	3530.1607507218573
191029	5	Nano 2	1	10	10	117.85672697798019	3518.9926420161564
191029	5	Nano 35	1	10	10	772.3686890241548	3518.672502828227
191029	5	Nano 2	1	10	11	137.31140850716145	3487.969519769264
191029	5	Nano 35	1	10	11	759.0449898731339	3489.9094757855128
191029	5	Nano 2	1	10	12	123.23128731507325	3493.7547365680266
191029	5	Nano 35	1	10	12	732.4088116370883	3498.528514482334
191029	5	Nano 2	1	10	13	131.28759021190945	3520.1641584791405
191029	5	Nano 35	1	10	13	784.6830322893242	3518.0783489728747
191029	5	Nano 2	1	10	14	91.71198159323522	3514.6509351030486
191029	5	Nano 35	1	10	14	760.0052509724417	3510.4738309313484
191029	5	Nano 2	1	10	15	118.00330978182842	3500.52997623162
191029	5	Nano 35	1	10	15	748.7739650295622	3497.7446805069285
191029	5	Nano 2	1	10	16	113.10796095777279	3477.807881481509
191029	5	Nano 35	1	10	16	721.4492869891161	3472.09479031574
191029	5	Nano 2	1	11	3	124.59483758155883	3445.162180065097
191029	5	Nano 35	1	11	3	729.3517158980045	3448.5964851789204
191029	5	Nano 2	1	11	4	112.65317217558632	3414.402312662808
191029	5	Nano 35	1	11	4	770.9254169317854	3418.203396040355
191029	5	Nano 2	1	11	5	121.00224375684704	3403.507617539869
191029	5	Nano 35	1	11	5	759.1612000804291	3408.6222279746503
191029	5	Nano 2	1	11	6	119.70323243924723	3432.7707799890277
191029	5	Nano 35	1	11	6	669.5873607764909	3427.216194061776
191029	5	Nano 2	1	13	2	123.56337730316484	3436.861397864545
191029	5	Nano 35	1	13	2	755.3497336316592	3436.624566079224
191029	5	Nano 2	1	13	3	120.59496370133472	3409.4775907654016
191029	5	Nano 35	1	13	3	720.6841038496509	3409.997003169571
191029	5	Nano 2	1	13	4	107.3970627475738	3471.066646431028
191029	5	Nano 35	1	13	4	709.1793380425959	3472.5744331022875
191029	5	Nano 2	1	13	5	134.2906954660127	3483.688784272968
191029	5	Nano 35	1	13	5	772.3584130000926	3480.6786923346235
191029	5	Nano 2	1	13	6	122.83194102286328	3407.791521231871
191029	5	Nano 35	1	13	6	769.6803151920682	3404.4901801095807
191029	5	Nano 2	1	13	7	123.460739141033	3383.446406340221
191029	5	Nano 35	1	13	7	698.5498252351215	3391.2349403587496
191029	5	Nano 2	1	13	8	104.18476473780287	3401.5241716521473
191029	5	Nano 35	1	13	8	717.5751700118577	3403.268327300721
191029	5	Nano 2	1	13	9	108.2942385362992	3437.3295016279053
191029	5	Nano 35	1	13	9	745.1614256709728	3433.710955078957
191029	5	Nano 2	1	13	10	134.51940483616966	3440.492106860175
191029	5	Nano 35	1	13	10	758.0826610048233	3444.0083373949433
191029	5	Nano 2	1	16	12	123.35101719550948	3576.865978357495
191029	5	Nano 35	1	16	12	742.8357962320946	3578.2266445006835
191030	4	Nano 2	1	5	8	98.07525360788642	3530.809500296016
191030	4	Nano 33	1	5	8	694.0251978178966	3539.2615110935412
191030	4	Nano 2	1	5	9	82.3141541569754	3574.6899450305004
191030	4	Nano 33	1	5	9	709.9286406159242	3570.5887730051036
191030	4	Nano 2	2	1	2	106.70405658647377	3789.900763819879
191030	4	Nano 33	2	1	2	867.6841172737696	3789.1881296593824
191030	4	Nano 2	2	2	2	70.6545237042478	3648.802513314193
191030	4	Nano 33	2	2	2	712.928398570954	3656.6471558888484
191030	4	Nano 2	2	2	3	86.61549010866892	3651.4055090497554
191030	4	Nano 33	2	2	3	698.0342837076123	3650.114623364541
191030	4	Nano 2	2	2	4	73.3877290909517	3673.983401835491
191030	4	Nano 33	2	2	4	720.6971992950769	3661.8377997418324
191030	4	Nano 2	2	2	5	87.15503651572973	3682.657745607467
191030	4	Nano 33	2	2	5	748.6522233502161	3680.7998446778993
191030	4	Nano 2	2	4	4	96.20666862275922	3569.587489264126
191030	4	Nano 33	2	4	4	735.0168105874866	3579.3960514516602
191030	4	Nano 2	2	6	2	100.6576060213756	3611.267006657821
191030	4	Nano 33	2	6	2	774.6815954750352	3608.8645527153344
191030	4	Nano 2	2	6	3	96.65383334409569	3625.206301446109
191030	4	Nano 33	2	6	3	770.4116424577372	3619.367330072212
191030	4	Nano 2	2	8	2	96.40414897055435	3790.4373610571447
191030	4	Nano 33	2	8	2	758.3019745319383	3784.770690381228
191030	4	Nano 2	2	8	3	102.576733777355	3775.634754560745
191030	4	Nano 33	2	8	3	762.3326798380722	3779.9921882713934
191030	4	Nano 2	2	9	2	106.64923121824197	3680.1482384882647
191030	4	Nano 33	2	9	2	689.6199813311532	3677.8748844466413
191030	4	Nano 2	2	9	3	94.2901899379271	3654.5175413800985
191030	4	Nano 33	2	9	3	683.0371874881332	3654.9567957387653
191030	4	Nano 2	2	12	4	112.57776403709015	3683.4794261631014
191030	4	Nano 33	2	12	4	746.5285279790802	3682.6943501278
191030	4	Nano 2	2	13	6	108.69190113718588	3578.095162771017
191030	4	Nano 33	2	13	6	676.8806468225688	3572.6731611084265
191031	10	Nano 29	1	3	5	174.05662941181114	3392.1372275492668
191031	10	Nano 35	1	3	5	718.280483497572	3390.5387732758063
191031	10	Nano 29	1	10	2	172.86528078479895	3338.2456012103808
191031	10	Nano 35	1	10	2	687.8873857422632	3341.1561104505718
191031	10	Nano 29	1	10	3	172.67422577204115	3348.746912583463
191031	10	Nano 35	1	10	3	691.0899430992697	3350.387177937585
191101	6	Nano 2	1	10	5	99.95159030982748	3415.1995729146965
191101	6	Nano 37	1	10	5	866.1913795559477	3425.5883375721055
191101	14	Nano 30	1	4	2	148.12562768174382	3480.3567312883692
191101	14	Nano 35	1	4	2	639.7917936270385	3485.7029603129113
191101	14	Nano 30	1	8	5	175.5963784245155	3380.6989967900604
191101	14	Nano 35	1	8	5	673.9564797576297	3382.332086605188
191101	14	Nano 30	1	9	2	180.06124667466432	3572.45702520756
191101	14	Nano 35	1	9	2	707.7092388447963	3575.1255221413835
191101	14	Nano 30	1	10	2	167.38982240891204	3538.1608080989004
191101	14	Nano 35	1	10	2	658.7231900366455	3537.5890989492564
191101	14	Nano 30	1	16	2	170.79483515898858	3545.167785065575
191101	14	Nano 35	1	16	2	653.1988542869611	3546.781973064906
191101	17	Nano 39	1	9	2	195.82060844577484	3487.9241330230498
191101	17	Nano 35	1	9	2	691.7853288098703	3483.899037706553
191102	17	Nano 39	2	1	4	193.05433690262038	3427.247081157189
191102	17	Nano 35	2	1	4	689.7323236236473	3429.4293171870613
191102	17	Nano 39	2	1	5	195.516245551419	3437.518260507041
191102	17	Nano 35	2	1	5	694.3131438066486	3438.284726586201
191102	17	Nano 39	2	1	6	186.16476211005417	3416.015578061385
191102	17	Nano 35	2	1	6	691.7398229515317	3416.1660955527154
191102	17	Nano 39	2	1	7	194.1798475805496	3415.738560082634
191102	17	Nano 35	2	1	7	703.5820888361209	3419.789363530907
191102	17	Nano 39	2	2	5	191.79385281667086	3325.2500420081124
191102	17	Nano 35	2	2	5	692.156851803213	3321.943520442146
191102	17	Nano 39	2	2	6	190.8810827176029	3312.8338057405217
191102	17	Nano 35	2	2	6	676.7717890340276	3306.5702922364976
191102	17	Nano 39	2	2	7	188.80257500989416	3303.185706104923
191102	17	Nano 35	2	2	7	692.2411958201843	3313.8721113308447
191102	17	Nano 39	2	2	8	184.93000502651054	3311.335456334003
191102	17	Nano 35	2	2	8	682.2775785632751	3313.213844135809
191102	17	Nano 39	2	3	3	191.34631639216633	3368.8971685522138
191102	17	Nano 35	2	3	3	662.075586190565	3367.254239873106
191102	17	Nano 39	2	4	6	190.2119281268301	3329.272491247143
191102	17	Nano 35	2	4	6	697.7710308366667	3332.08120277959
191102	17	Nano 39	2	6	7	198.26854811880023	3467.767751351286
191102	17	Nano 35	2	6	7	706.6176997781306	3465.367265069352
191102	17	Nano 39	2	6	8	189.6316761560948	3481.2286226663714
191102	17	Nano 35	2	6	8	683.2527038975559	3474.090973056967
191102	17	Nano 39	2	8	2	192.2915694672552	3470.4576284623854
191102	17	Nano 35	2	8	2	679.0951806502673	3466.7324213111183
191102	17	Nano 39	2	8	3	194.96565419402012	3498.2996202495756
191102	17	Nano 35	2	8	3	690.1635884465808	3496.190230241393
191102	17	Nano 39	2	8	4	193.72476292430576	3514.688291728011
191102	17	Nano 35	2	8	4	684.6885189638351	3517.039489337181
191102	17	Nano 39	2	8	5	197.97699034585904	3523.0681433074506
191102	17	Nano 35	2	8	5	699.3953876231649	3523.449823317677
191102	17	Nano 39	2	9	2	194.69519390855447	3467.9050747269725
191102	17	Nano 35	2	9	2	690.0352833525093	3473.852893519232
191102	17	Nano 39	2	9	3	198.21068964968774	3451.706801782935
191102	17	Nano 35	2	9	3	691.1878826938955	3450.24926815811
191102	17	Nano 39	2	9	4	184.8227950387705	3434.5955745695005
191102	17	Nano 35	2	9	4	674.9984254107824	3426.0651148664065
191102	17	Nano 39	2	12	4	200.74814807146197	3525.402671822232
191102	17	Nano 35	2	12	4	710.8488162090973	3524.1849372616593
191102	17	Nano 39	2	12	5	199.59807134615852	3519.215415213789
191102	17	Nano 35	2	12	5	678.6146728795107	3526.662054662107
191102	17	Nano 39	2	12	6	193.29235107038784	3541.2242331739058
191102	17	Nano 35	2	12	6	685.5341695381255	3540.0617101544317
191102	17	Nano 39	2	13	3	187.1755028234597	3618.323265495573
191102	17	Nano 35	2	13	3	661.0284516901874	3619.0148993806642
191102	17	Nano 39	2	13	4	188.79333408676118	3600.4289253106126
191102	17	Nano 35	2	13	4	691.518279101633	3605.75917351493
191102	17	Nano 39	2	13	5	189.69284027901128	3589.349664384132
191102	17	Nano 35	2	13	5	699.2259809748215	3588.6891180616863
191102	17	Nano 39	2	14	4	210.87656786753982	3617.5642929993573
191102	17	Nano 35	2	14	4	692.8237100042888	3611.4364336932863
191102	17	Nano 39	2	14	5	190.17374326705811	3614.233781587333
191102	17	Nano 35	2	14	5	687.6998939344259	3614.596880100281
191102	17	Nano 39	2	17	2	197.4922169607793	3670.156652456821
191102	17	Nano 35	2	17	2	697.7077589773818	3661.7731058682953
191102	17	Nano 39	2	17	3	198.431275593163	3645.192829452543
191102	17	Nano 35	2	17	3	714.9097469839189	3647.497542419073
191102	17	Nano 39	2	17	4	202.62016236213032	3630.283457055097
191102	17	Nano 35	2	17	4	715.2898586900545	3640.404839155537
191102	17	Nano 39	2	17	5	198.39555708547195	3633.534719393919
191102	17	Nano 35	2	17	5	653.8792557364496	3633.514428312597
191103	9	Nano 29	2	3	3	168.92589790712904	3459.677303954232
191103	9	Nano 33	2	3	3	693.7437839212552	3455.842735802713
191103	9	Nano 29	2	5	4	161.01204155836314	3580.8942472445165
191103	9	Nano 33	2	5	4	665.5018323856212	3573.754940597051
191103	9	Nano 29	2	5	5	154.36647976117925	3558.745310459871
191103	9	Nano 33	2	5	5	657.8333747233846	3551.254743796367
191103	9	Nano 29	2	9	2	166.85763619798712	3484.120400979828
191103	9	Nano 33	2	9	2	669.4618835801551	3485.2211562216917
191103	9	Nano 29	2	11	2	168.29045233011342	3569.9296578150725
191103	9	Nano 33	2	11	2	641.3633617475706	3567.0828262174714
191103	9	Nano 29	2	12	2	162.0446936573157	3488.596213117224
191103	9	Nano 33	2	12	2	678.4523571020234	3487.612237840974
191103	9	Nano 29	2	12	3	176.00519400144333	3498.4106188506653
191103	9	Nano 33	2	12	3	677.5405939579766	3494.88931717084
191103	9	Nano 29	2	12	4	168.87816472207373	3495.073978277676
191103	9	Nano 33	2	12	4	664.993350755921	3491.8116416164803
191103	9	Nano 29	2	13	3	183.3369373290281	3505.627320394623
191103	9	Nano 33	2	13	3	715.5514028927147	3504.215773788262
191103	9	Nano 29	2	14	2	175.85900403130012	3576.8494344069672
191103	9	Nano 33	2	14	2	698.0745775370337	3570.004007039321
191103	9	Nano 29	2	18	2	221.49134535658527	3572.3579117464164
191103	9	Nano 33	2	18	2	742.8793567718436	3568.3878835234473
191103	11	Nano 29	2	1	2	182.1404623348313	3546.0921488391564
191103	11	Nano 37	2	1	2	694.0526211962523	3545.107009683481
191103	11	Nano 29	2	1	3	187.70393226983387	3547.696613833454
191103	11	Nano 37	2	1	3	711.3163944692293	3547.917838434932
191103	11	Nano 29	2	1	4	180.6680982332176	3553.924860914119
191103	11	Nano 37	2	1	4	687.0917626045684	3555.2819023505717
191103	11	Nano 29	2	2	3	183.13922338352899	3475.873087337588
191103	11	Nano 37	2	2	3	694.3709392850583	3474.617329141079
191103	11	Nano 29	2	2	4	177.5280239448701	3480.186116127993
191103	11	Nano 37	2	2	4	699.6288655392998	3483.810811029111
191103	11	Nano 29	2	2	5	181.3643004941736	3530.1559469027584
191103	11	Nano 37	2	2	5	711.3730109704921	3532.682490519884
191103	11	Nano 29	2	4	3	174.78338483604716	3568.1851574076927
191103	11	Nano 37	2	4	3	710.558054687063	3569.1983342863878
191103	11	Nano 29	2	4	4	184.1680953138784	3579.884444814832
191103	11	Nano 37	2	4	4	693.8646582152377	3588.2498546629017
191103	11	Nano 29	2	4	5	229.52761785764537	3618.2295793747694
191103	11	Nano 37	2	4	5	763.7748903177753	3620.6874687899626
191103	11	Nano 29	2	4	6	177.07661089162684	3601.9194857436564
191103	11	Nano 37	2	4	6	706.614474296473	3594.4017151202006
191103	11	Nano 29	2	5	5	181.9830074130321	3586.751554276706
191103	11	Nano 37	2	5	5	702.2891810935257	3587.49811915822
191103	13	Nano 30	1	2	4	175.1976922341271	3474.035361933843
191103	13	Nano 33	1	2	4	690.4710499950697	3471.306945262881
191103	13	Nano 30	1	2	5	171.5301430143127	3449.4600115861103
191103	13	Nano 33	1	2	5	666.6223277269876	3456.617460433015
191103	13	Nano 30	1	6	2	167.6651676424369	3517.2230732743433
191103	13	Nano 33	1	6	2	679.6522668535279	3519.108774724297
191103	13	Nano 30	1	12	2	182.38130555081176	3617.192069501114
191103	13	Nano 33	1	12	2	707.6760098101994	3616.06744930776
191103	13	Nano 30	1	13	3	175.0959801410593	3679.5054161739113
191103	13	Nano 33	1	13	3	661.5587335942993	3674.240723279248
191103	13	Nano 30	1	17	5	181.1508212348457	3561.0930864198554
191103	13	Nano 33	1	17	5	679.1436919389466	3559.5911002092216
191103	13	Nano 30	1	17	6	191.619051797538	3538.7204727512017
191103	13	Nano 33	1	17	6	685.4150583266482	3541.687066589904
191103	13	Nano 30	1	19	3	173.83819701062282	3595.429712369851
191103	13	Nano 33	1	19	3	670.4793024206845	3589.308220277121
191103	15	Nano 30	1	3	6	185.7946273793636	3643.631947182661
191103	15	Nano 37	1	3	6	698.7717487164169	3638.531773296223
191103	15	Nano 30	1	6	2	179.7282635827375	3599.1649452115503
191103	15	Nano 37	1	6	2	678.1622207945851	3599.7308877237074
191103	15	Nano 30	1	6	3	175.88064187765946	3588.626107337537
191103	15	Nano 37	1	6	3	678.816006926616	3593.2144770883174
191103	15	Nano 30	1	7	2	176.57461519595563	3615.1048076228026
191103	15	Nano 37	1	7	2	671.0749617332451	3618.426277494093
191103	15	Nano 30	1	8	2	201.47726703643625	3616.175848267686
191103	15	Nano 37	1	8	2	715.5776504680106	3617.1221128104808
191103	15	Nano 30	1	9	2	193.4225523222101	3728.037439973128
191103	15	Nano 37	1	9	2	705.7234529160187	3728.7396291511695
191103	15	Nano 30	1	9	3	183.72825368020287	3722.650677889637
191103	15	Nano 37	1	9	3	678.6725084385325	3728.6815011418203
191103	15	Nano 30	1	9	4	182.2260923825984	3696.875800223316
191103	15	Nano 37	1	9	4	694.9066993225447	3696.617279694288
191103	15	Nano 30	1	10	8	185.93444622967297	3675.0834856041524
191103	15	Nano 37	1	10	8	691.1325331080513	3676.704388516169
191103	15	Nano 30	1	11	4	188.75902723560986	3832.9154576182955
191103	15	Nano 37	1	11	4	693.0675019092313	3831.366381942873
