# Supplementary figures and images for: Nanobodies combined with DNA-PAINT super-resolution reveal a staggered titin nanoarchitecture in flight muscles
Source: eLife journal article supplement (doi:10.7554/elife.79344), 2022-12-13

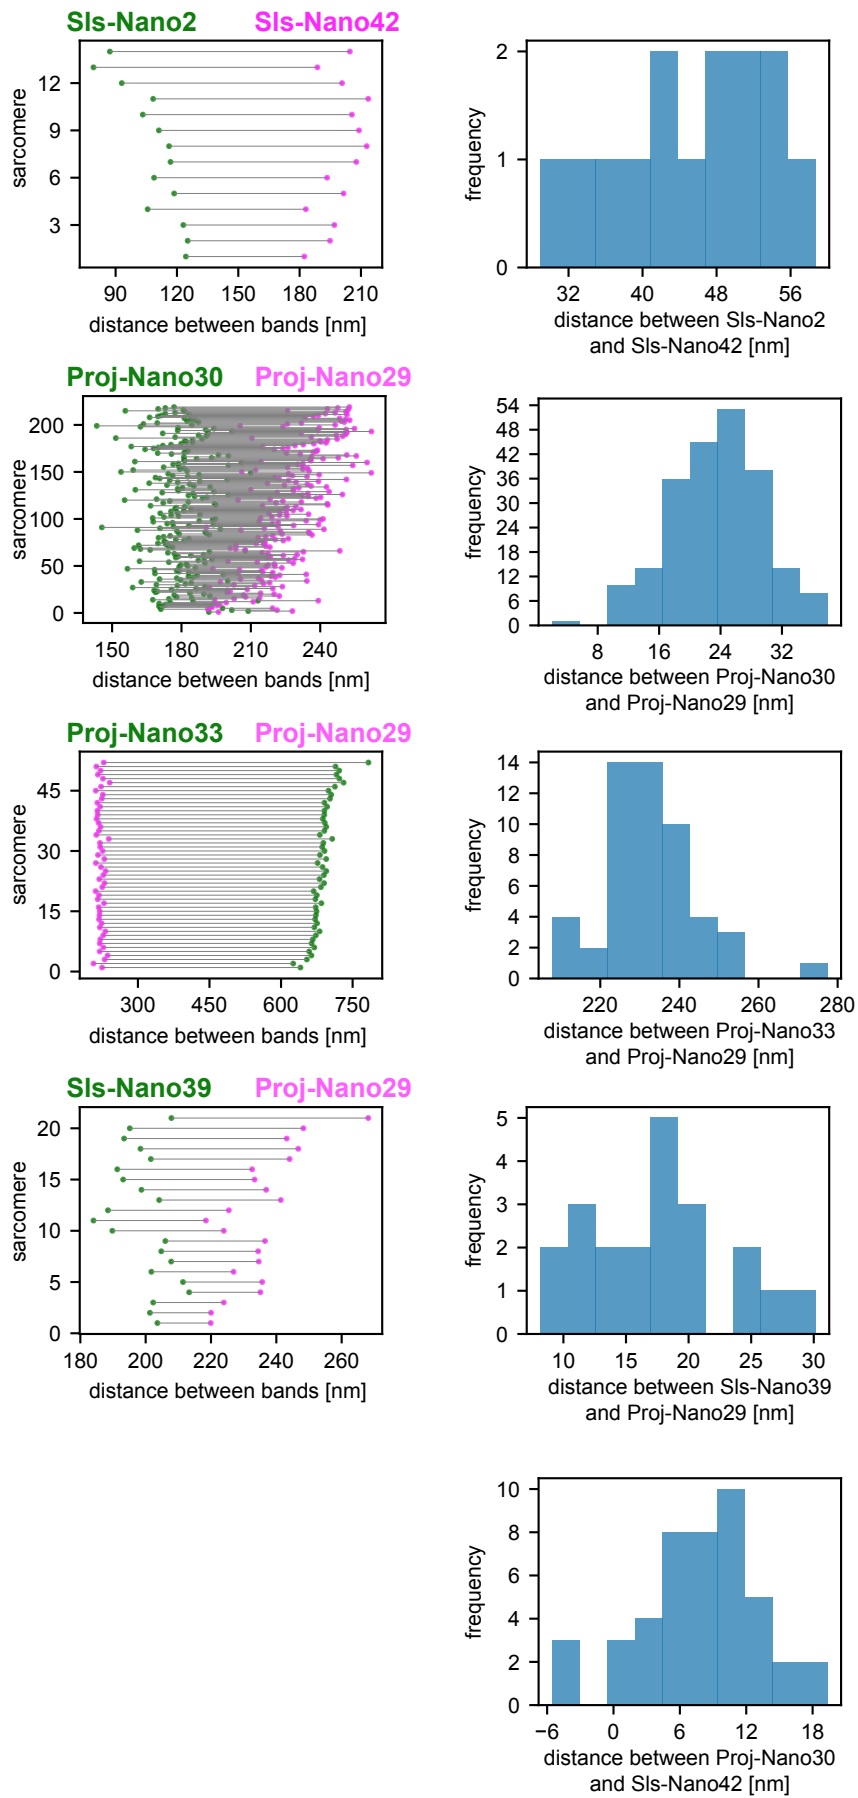

**Figure 5 - figure supplement 1**

Supplement: supp [file elife-79344-supp-v1.zip]

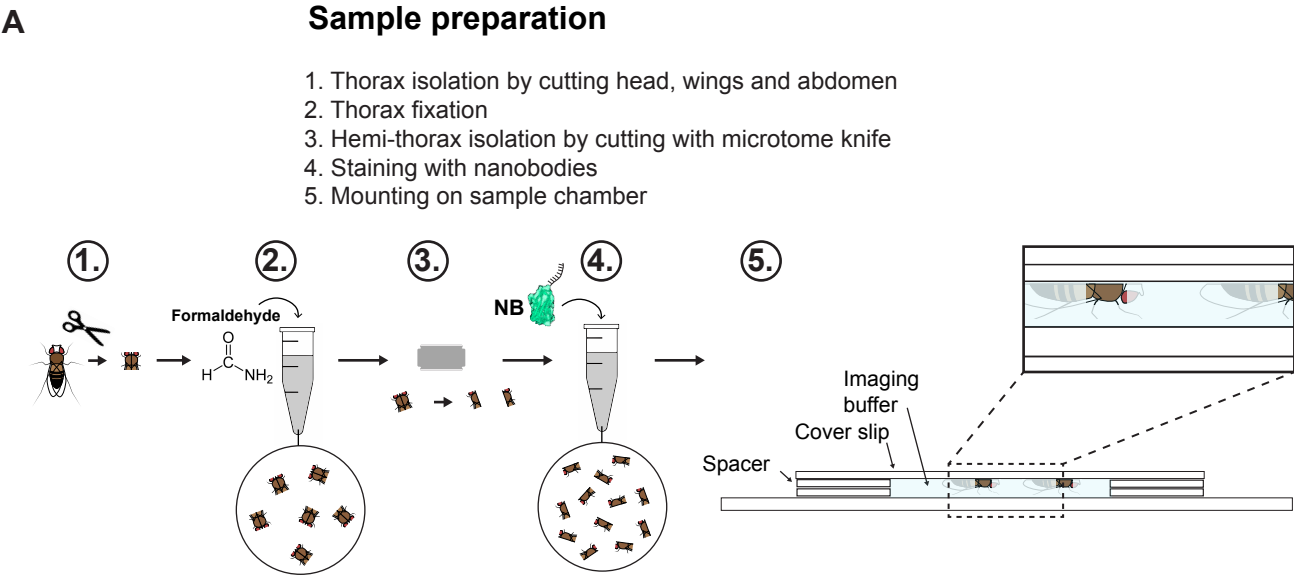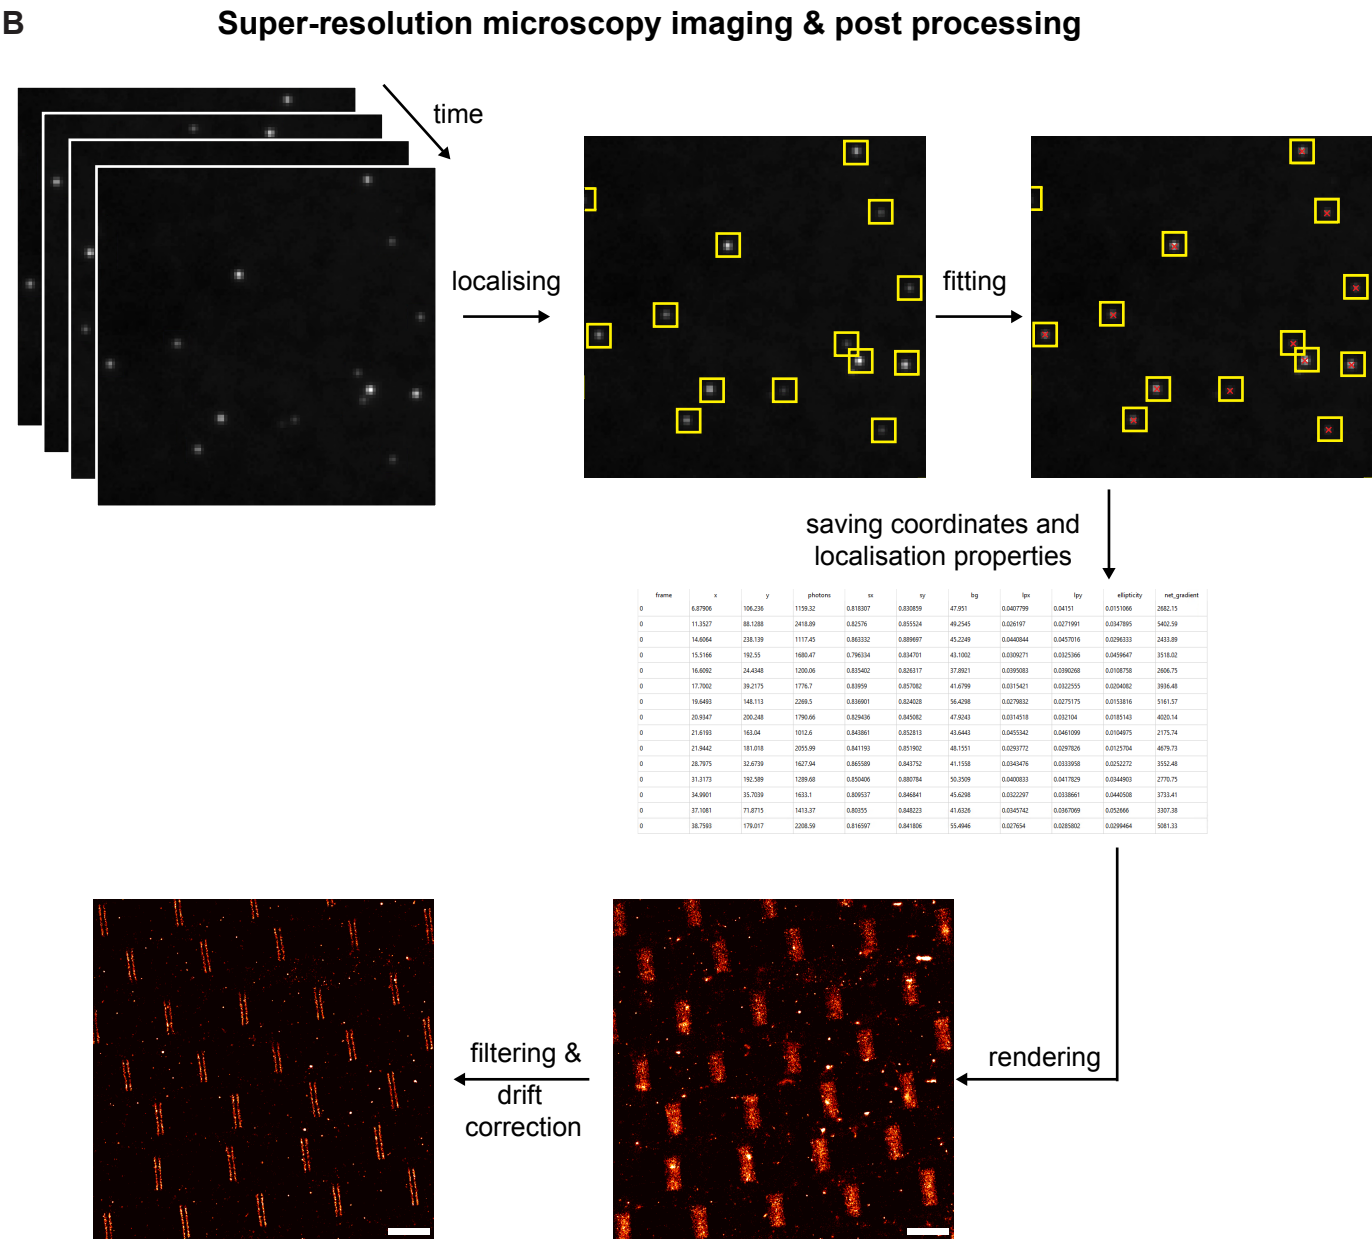

Figure 3 - figure supplement 1

Supplement: supp [file elife-79344-supp-v1.zip › elife_poa_e79344_Figure_3_figure_supplement_1.pdf]

## Data analysis workflow

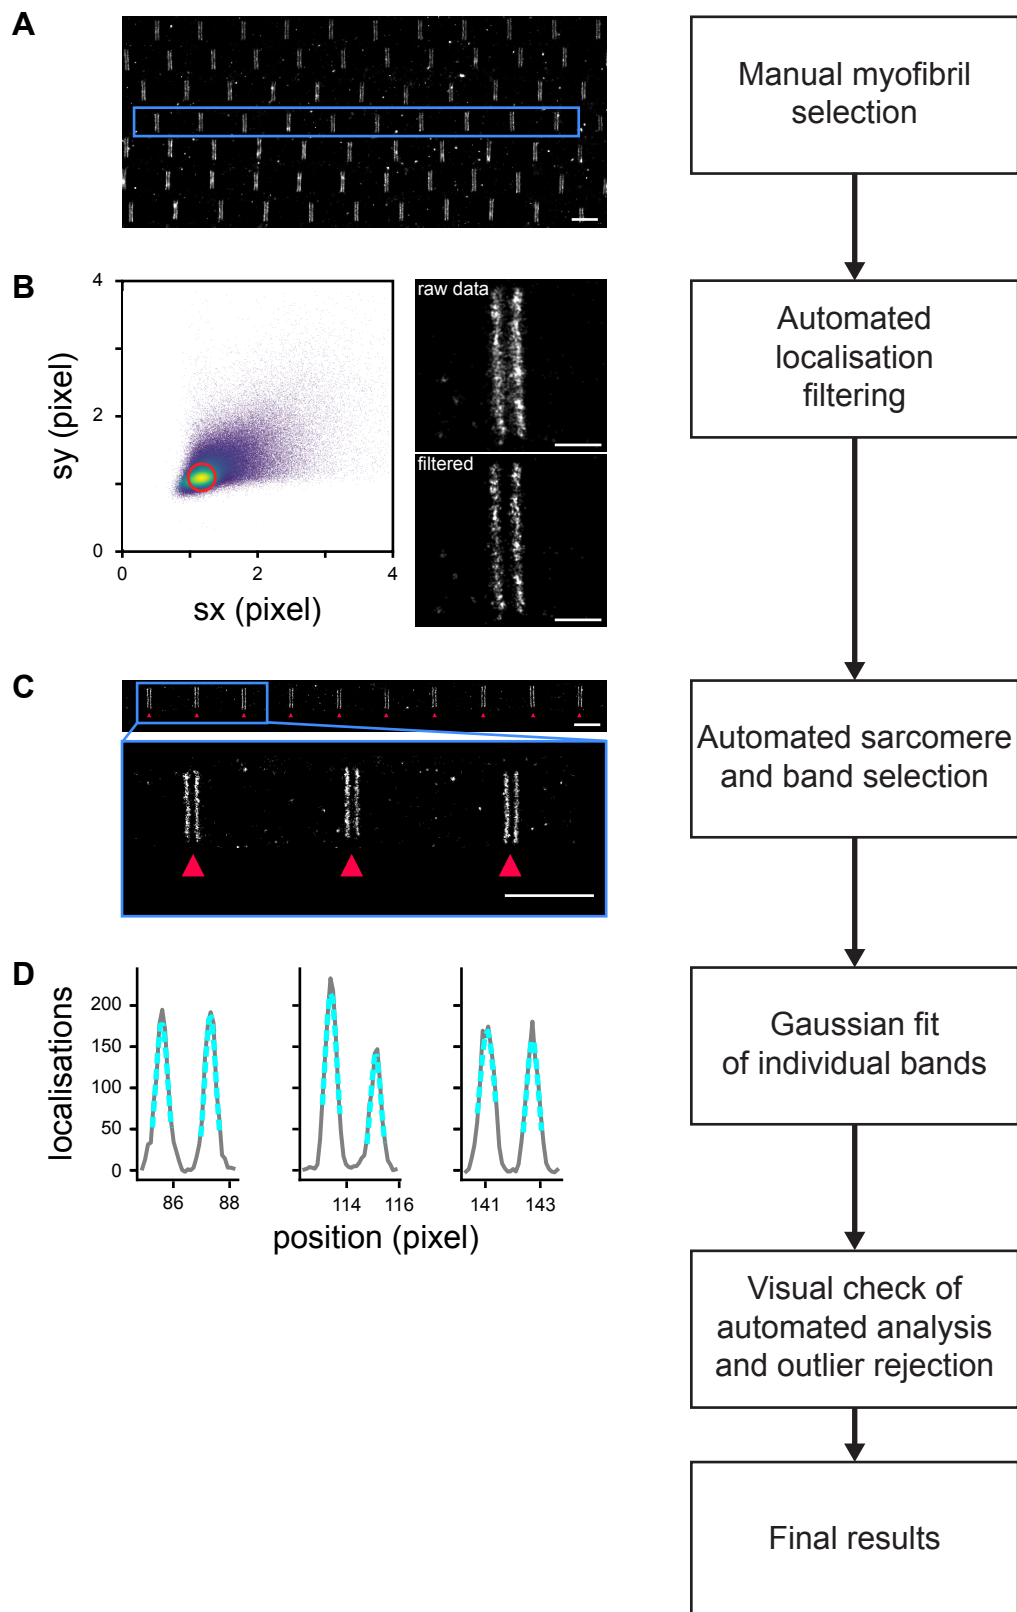

Figure 3 - figure supplement 2

Supplement: supp [file elife-79344-supp-v1.zip › elife_poa_e79344_Figure_3_figure_supplement_2.pdf]

### Distance between bands versus sarcomere length

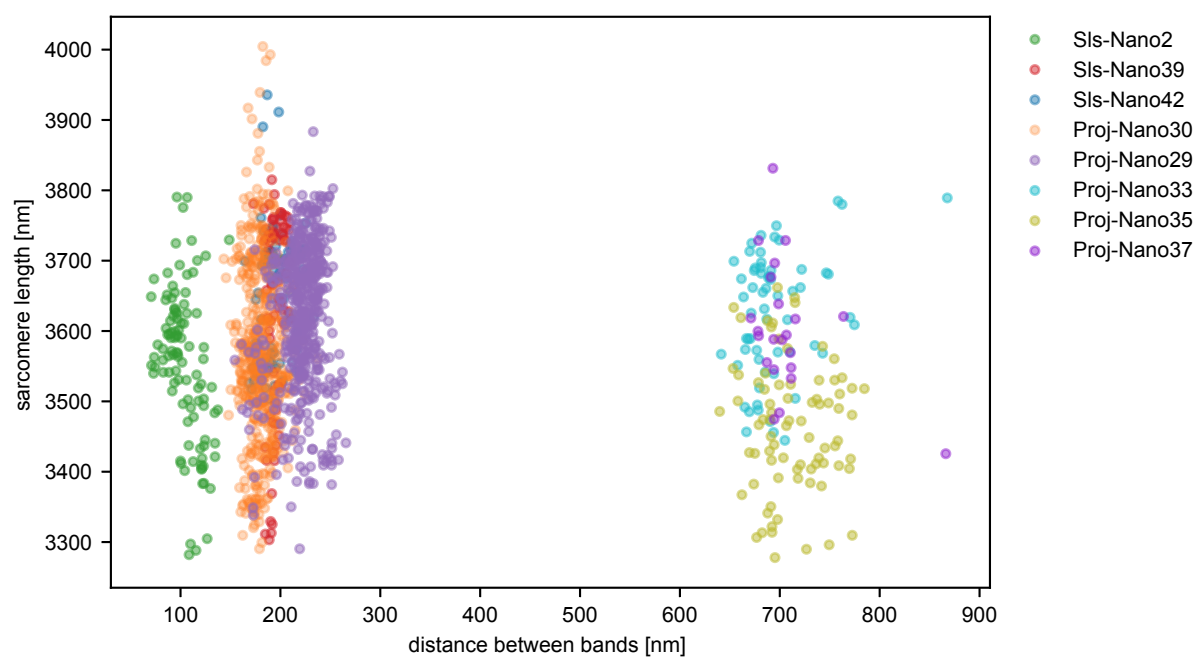

Figure 6 - figure supplement 1

Supplement: supp [file elife-79344-supp-v1.zip › elife_poa_e79344_Figure_6_figure_supplement_1.pdf]
